# Supplementary material for: Synthesis of blue-red emissive amido-substituted di(het)aryl and tri(het)aryl amine derivatives via chemoselective N-mono and N,N-diarylation of (het) aryl amino amides using benzyne/arynes
Source: Royal Society of Chemistry journal article supplement (doi:10.1039/c8nj05823g), 2019-01-01
Supplement: c8nj05823g1.pdf [file c8nj05823g1.pdf]

# Synthesis of Blue-Red Emissive Amido Substituted Di(het)aryl and Tri(het)aryl Amine Derivatives via Chemoselective *N*-Mono and *N, N*-Diarylation of (Het) Aryl Amino Amides Using Benzyne/Arynes

Ramakrishnan Suseela Meerakrishna and Ponnusamy Shanmugam\*

*Organic and Bioorganic Chemistry Division, CSIR-Central Leather Research Institute (CLRI), Adyar, Chennai-600020, India*  
Email: shanmu196@rediffmail.com

## List of Contents

## Page No.

|                                                  |     |
|--------------------------------------------------|-----|
| 1. Copies of NMR and HRMS Spectra                | S2  |
| 2. Absorption and emission data of compounds     | S54 |
| 3. UV-Vis and Emission spectra                   | S54 |
| 4. Crystallographic Data of compound <b>4a</b>   | S59 |
| 5. Solvatochromatic effect of compound <b>4j</b> | S60 |

# Copies of NMR and HRMS Spectra

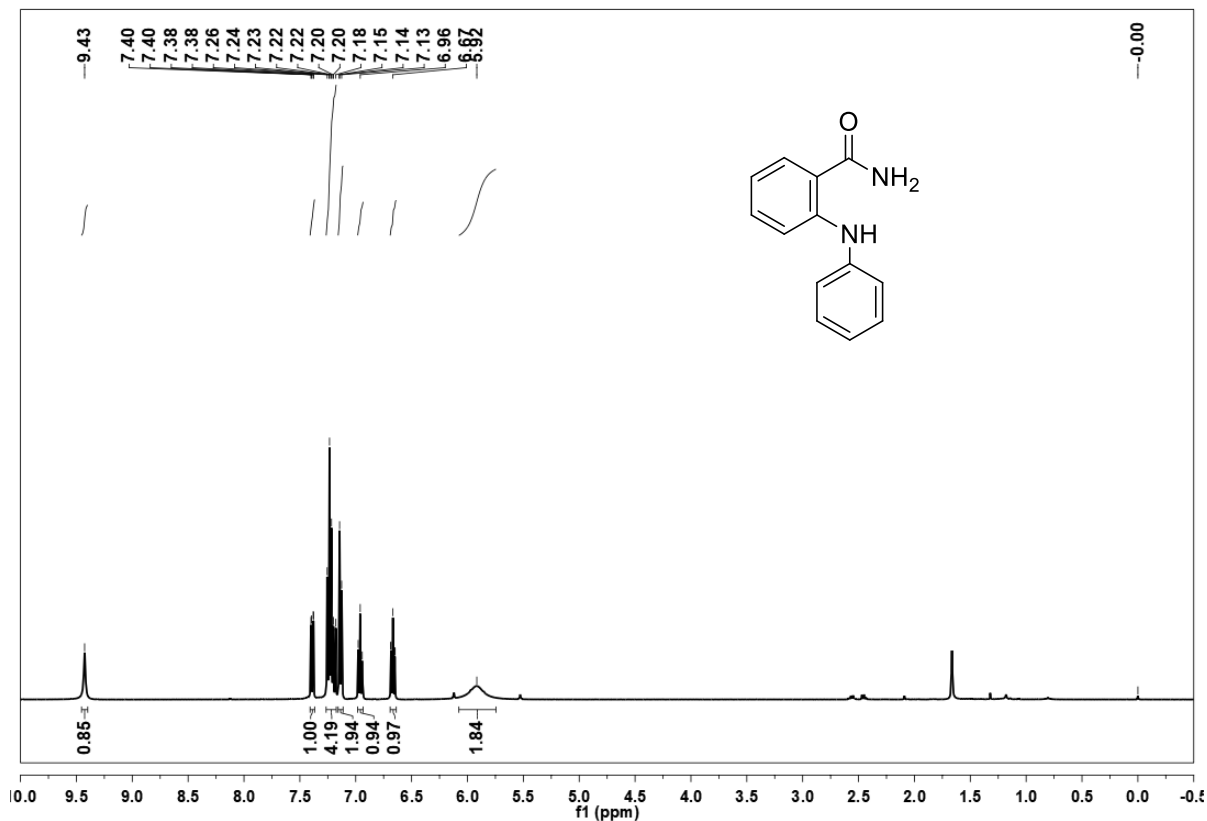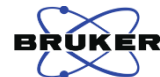

Current Data Parameters  
 NAME MKII-112F2  
 EXENO 1  
 PROCNO 1

F2 - Acquisition Parameters  
 Date\_ 20170606  
 Time 20.27  
 INSTRUM spect  
 PROBHD 5 mm PABBO BB/  
 PULPROG zg30  
 TD 65536  
 SOLVENT CDCl3  
 NS 16  
 DS 2  
 SWH 8012.820 Hz  
 FIDRES 0.122266 Hz  
 AQ 4.0894465 sec  
 RG 99.98  
 LW 62.400 usec  
 DE 6.50 usec  
 TE 297.2 K  
 D1 1.0000000 sec  
 TDO 1

===== CHANNEL f1 =====  
 SF01 400.2324716 MHz  
 NUC1 1H  
 P1 12.75 usec  
 PLW1 12.0000000 W

F2 - Processing parameters  
 SI 65536  
 SF 400.2300425 MHz  
 WDW EM  
 SSB 0  
 LB 0.30 Hz  
 GB 0  
 PC 1.00

<sup>1</sup>H NMR Spectrum of Compound 3a

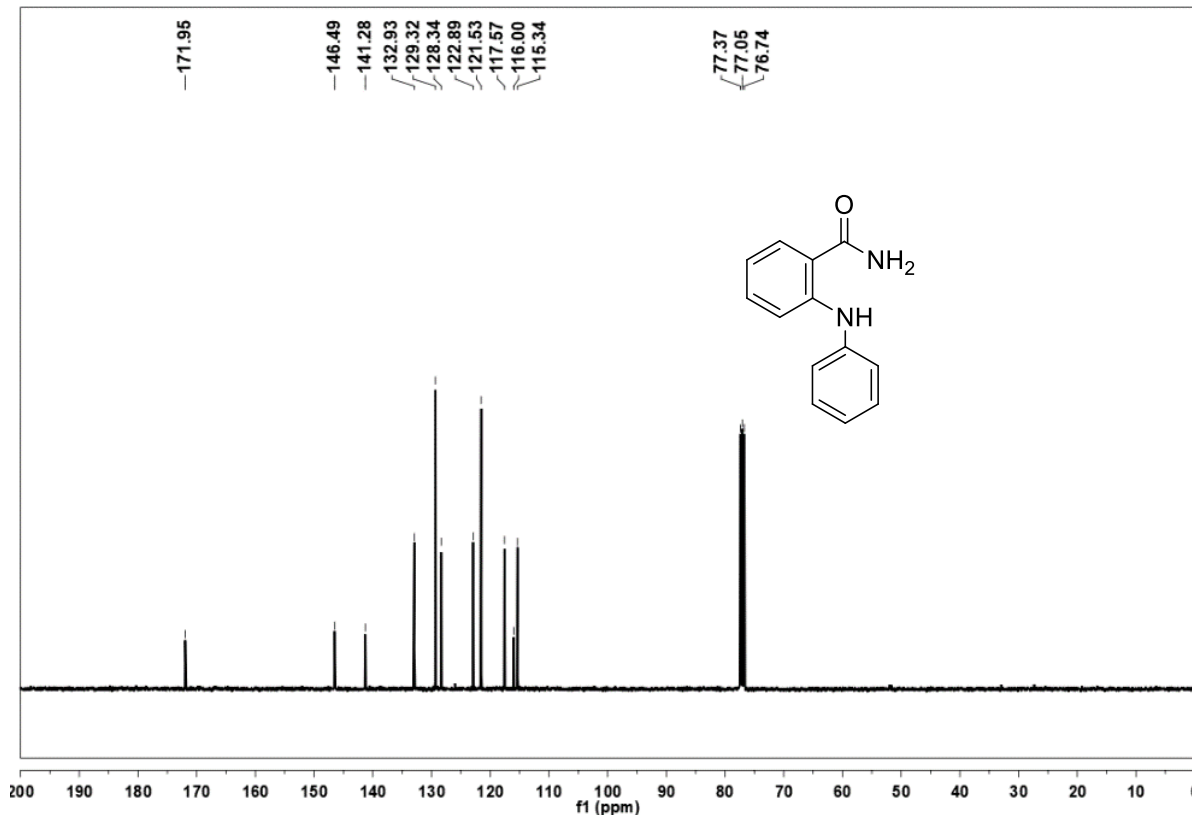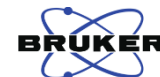

Current Data Parameters  
 NAME MKII-112F2  
 EXENO 2  
 PROCNO 1

F2 - Acquisition Parameters  
 Date\_ 20170606  
 Time 20.56  
 INSTRUM spect  
 PROBHD 5 mm PABBO BB/  
 PULPROG zgpg30  
 TD 65536  
 SOLVENT CDCl3  
 NS 512  
 DS 4  
 SWH 24038.461 Hz  
 FIDRES 0.366798 Hz  
 Aq 1.3631488 sec  
 RG 204.46  
 LW 20.800 usec  
 DE 6.50 usec  
 TE 298.2 K  
 D1 2.0000000 sec  
 D11 0.0300000 sec  
 TDO 1

===== CHANNEL F1 =====  
 SF01 100.6479769 MHz  
 NUC1 13C  
 P1 10.62 usec  
 PLW1 54.0000000 W

===== CHANNEL F2 =====  
 SF02 400.2316009 MHz  
 NUC2 1H  
 CPDPRG2 waltz16  
 PCPD2 90.00 usec  
 PLW2 12.0000000 W  
 PLW12 0.24083000 W  
 PLW13 0.19508000 W

F2 - Processing parameters  
 SI 32768  
 SF 100.6379135 MHz  
 WDW EM  
 SSB 0  
 LB 1.00 Hz  
 GB 0  
 PC 1.40

<sup>13</sup>C NMR Spectrum of Compound 3a

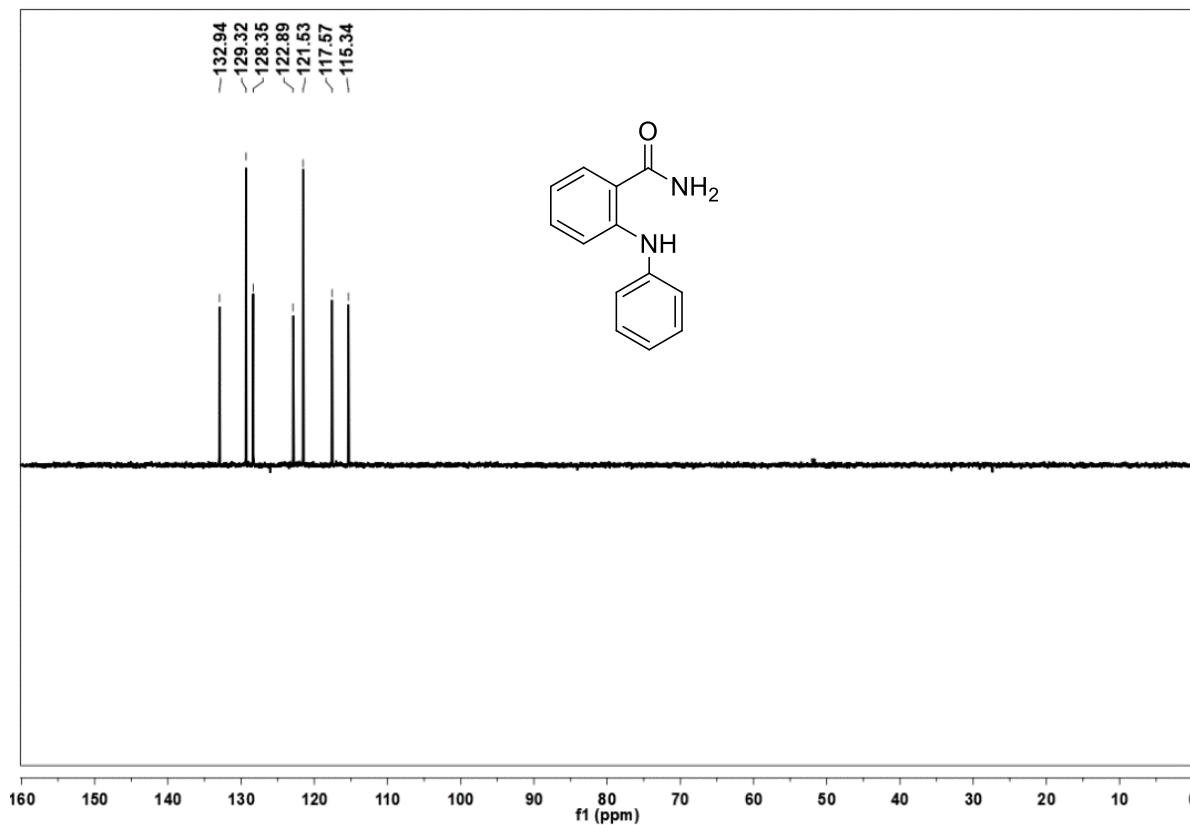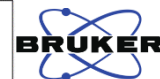

Current Data Parameters  
 Data: 20170606  
 NAME: MK11-112F2  
 EXPRNO: 3  
 PROCNO: 1

F2 - Acquisition Parameters  
 Date\_: 20170606  
 Time: 21.14  
 INSTRUM: spect  
 PROBHD: 5 mm PABBO BB/  
 PULPROG: zgpg30  
 TD: 65536  
 SOLVENT: CDCl3  
 NS: 256  
 DS: 4  
 SWH: 16129.032 Hz  
 FIDRES: 0.246110 Hz  
 AQ: 2.0316160 sec  
 RG: 204.46  
 RW: 31.000 usec  
 DE: 6.50 usec  
 TE: 297.5 K  
 CQX2: 145.000000  
 D1: 2.0000000 sec  
 D2: 0.00344828 sec  
 D12: 0.00002000 sec  
 TD0: 1

==== CHANNEL f1 =====  
 SFO1: 100.6459641 MHz  
 NUCL1: 13C  
 P1: 10.62 usec  
 PL1: 2000.00 usec  
 PCMO: 0 W  
 FLW1: 54.0000000 W  
 SFO1S5: Ccp60comp, 4  
 SFOALS: 0.500  
 SFOFES: 0 Hz  
 SFOFS: 9.30539989 W

==== CHANNEL f2 =====  
 SFO2: 400.2312800 MHz  
 NUCL2: 1H  
 CPDPRG2: waltz16  
 P3: 12.75 usec  
 P4: 25.50 usec  
 PCPD2: 90.00 usec  
 PLW2: 12.0000000 W  
 PLW12: 0.24083000 W

F2 - Processing parameters  
 SI: 32768  
 SF: 100.6379135 MHz  
 WF: EM  
 GB: 0  
 LB: 1.00 Hz  
 GB: 0  
 PC: 1.40

DEPT-135 NMR Spectrum of Compound 3a

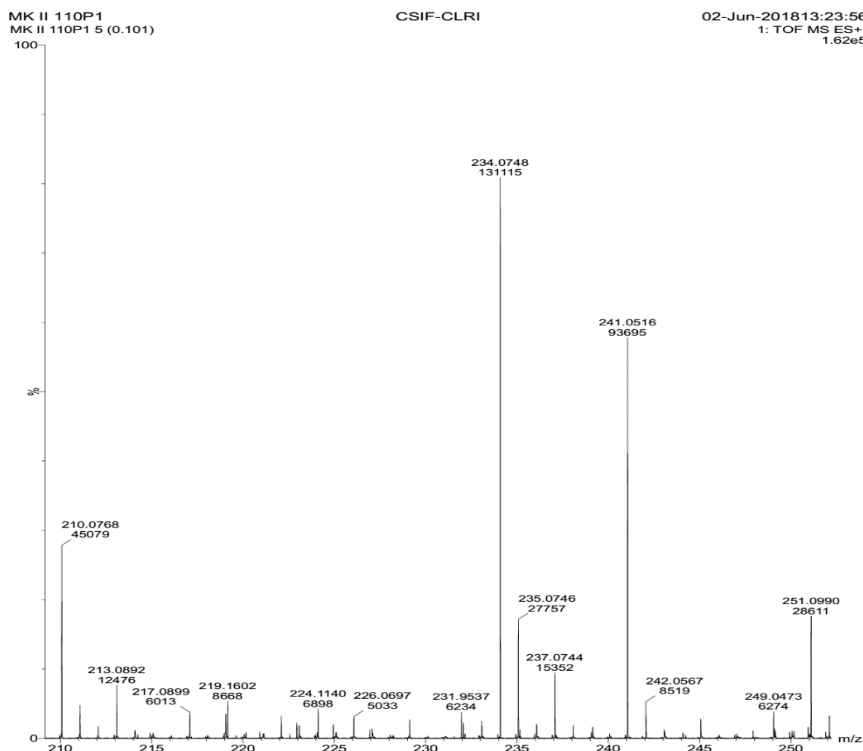

HRMS Spectrum of Compound 3a

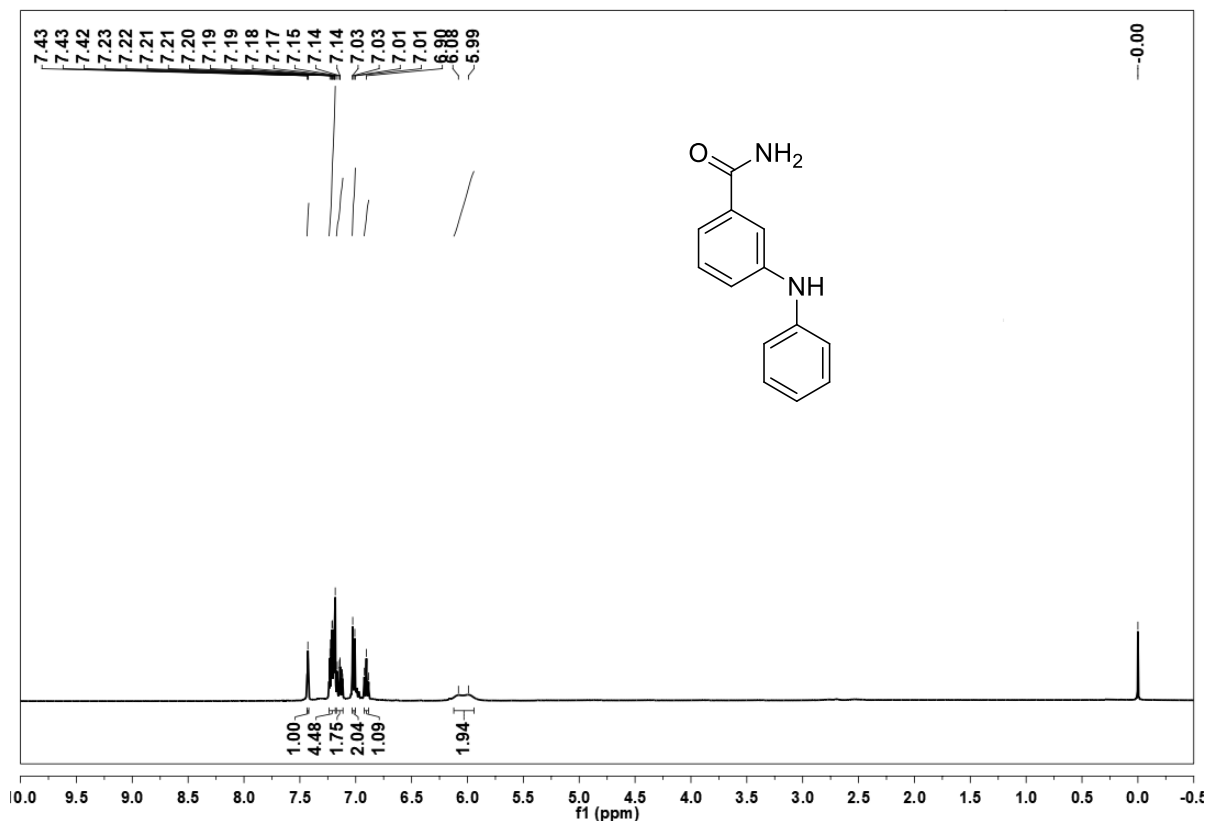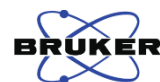

Current Data Parameters  
 NAME MKII-188 P2 High Scan  
 EXPNO 1  
 PROCNO 1

F2 - Acquisition Parameters  
 Date\_ 20180405  
 Time 21.20  
 INSTRUM spect  
 PROBRD 5 mm PABBO BB/  
 PULPROG zg30  
 TD 65536  
 SOLVENT CDCl3  
 NS 64  
 DS 2  
 SWE 8012.820 Hz  
 FIDRES 0.122266 Hz  
 AQ 4.0894465 sec  
 RG 49.2  
 DW 62.400 usec  
 DE 6.50 usec  
 TE 296.7 K  
 D1 1.0000000 sec  
 TD0 1

===== CHANNEL f1 =====  
 SFO1 400.2324716 MHz  
 NUCL1 1H  
 P1 12.75 usec  
 PLW1 12.00000000 W

F2 - Processing parameters  
 SI 65536  
 SF 400.2300405 MHz  
 WDW EM  
 SSB 0  
 LB 0.30 Hz  
 GB 0  
 PC 1.00

<sup>1</sup>H NMR Spectrum of Compound 3b

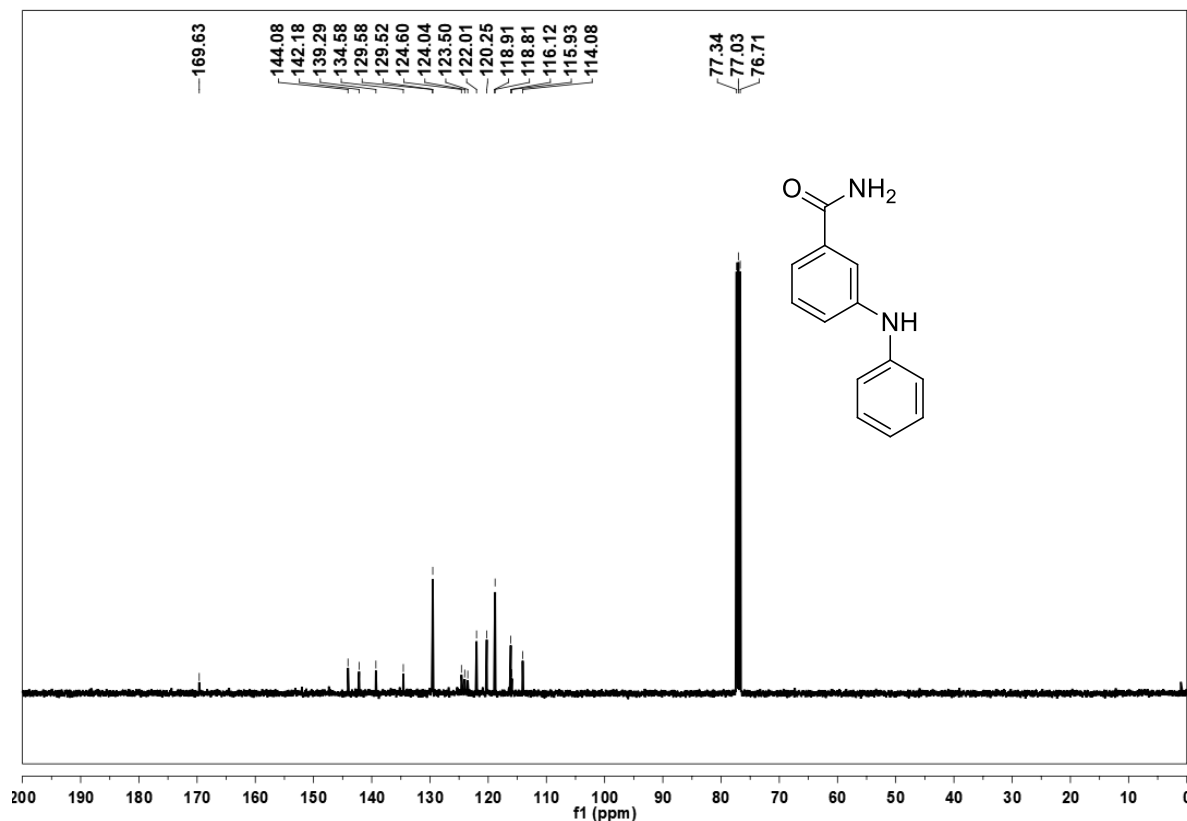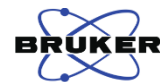

Current Data Parameters  
 NAME MKII-188 P2 High Scan  
 EXPNO 2  
 PROCNO 1

F2 - Acquisition Parameters  
 Date\_ 20180405  
 Time 23.15  
 INSTRUM spect  
 PROBRD 5 mm PABBO BB/  
 PULPROG zgpg30  
 TD 65536  
 SOLVENT CDCl3  
 NS 2000  
 DS 4  
 SWE 24038.461 Hz  
 FIDRES 0.366798 Hz  
 AQ 1.3631488 sec  
 RG 204.46  
 DW 20.800 usec  
 DE 4.50 usec  
 TE 298.0 K  
 D1 2.0000000 sec  
 D11 0.03000000 sec  
 TD0 1

===== CHANNEL f1 =====  
 SFO1 100.6479769 MHz  
 NUCL1 13C  
 P1 10.62 usec  
 PLW1 54.00000000 W

===== CHANNEL f2 =====  
 SFO2 400.2316009 MHz  
 NUCL2 1H  
 CPDPRG12 waltz16  
 PCPD2 90.00 usec  
 PLW2 12.00000000 W  
 PLW12 0.24083000 W  
 PLW13 0.19598000 W

F2 - Processing parameters  
 SI 32768  
 SF 100.6391176 MHz  
 WDW EX  
 SSB 0  
 LB 1.00 Hz  
 GB 0  
 PC 1.40

<sup>13</sup>C NMR Spectrum of Compound 3b

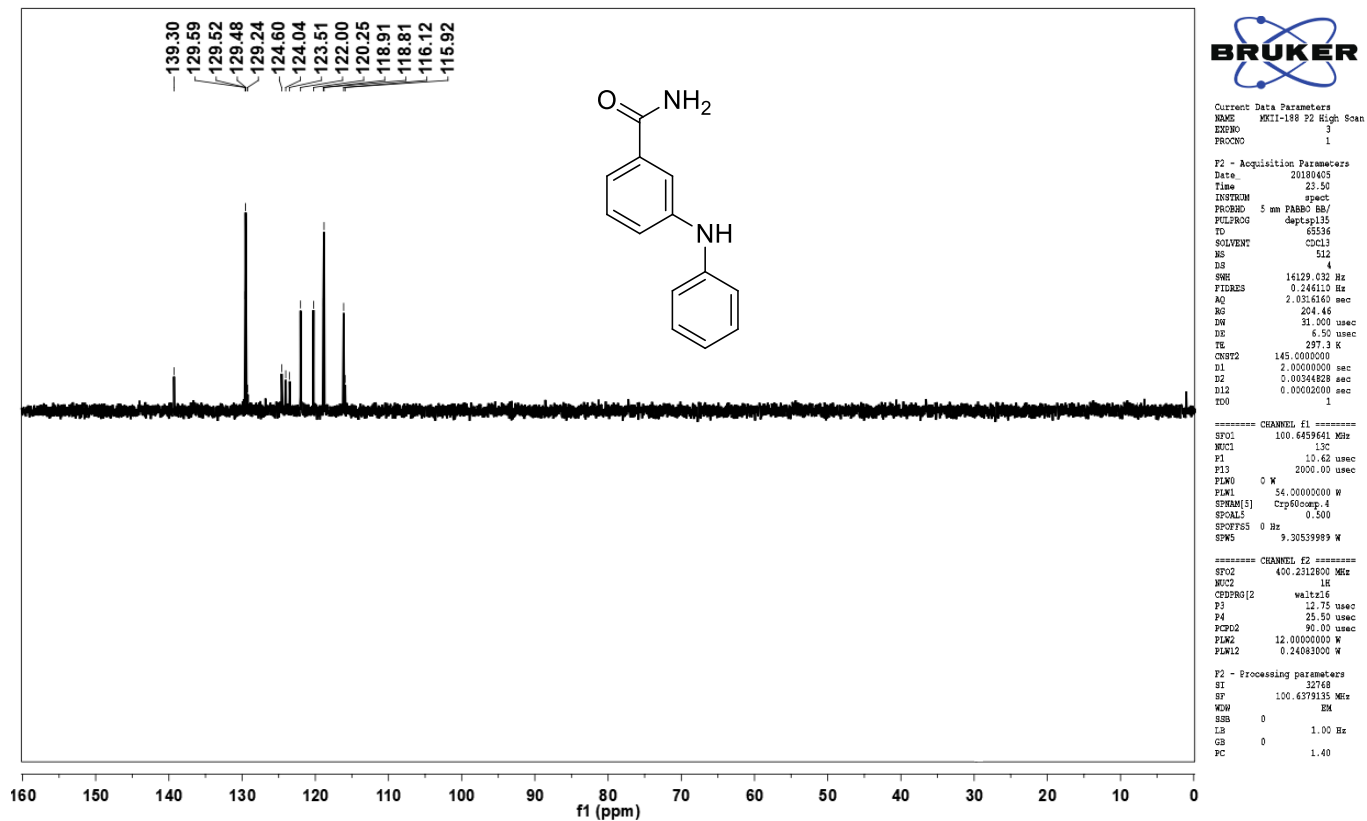

DEPT-135 NMR Spectrum of Compound **3b**

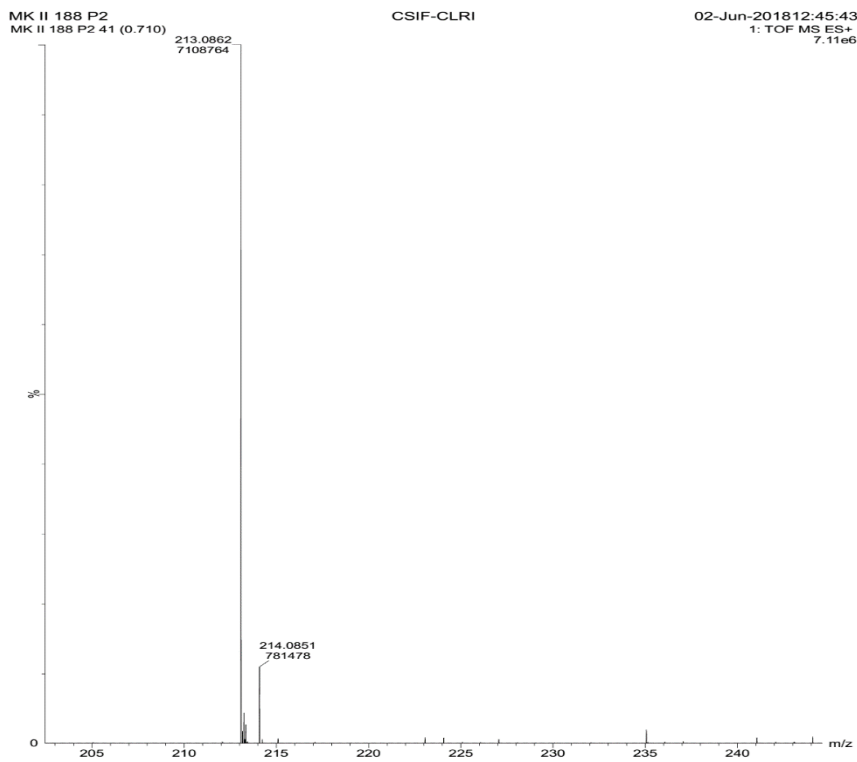

HRMS Spectrum of Compound **3b**

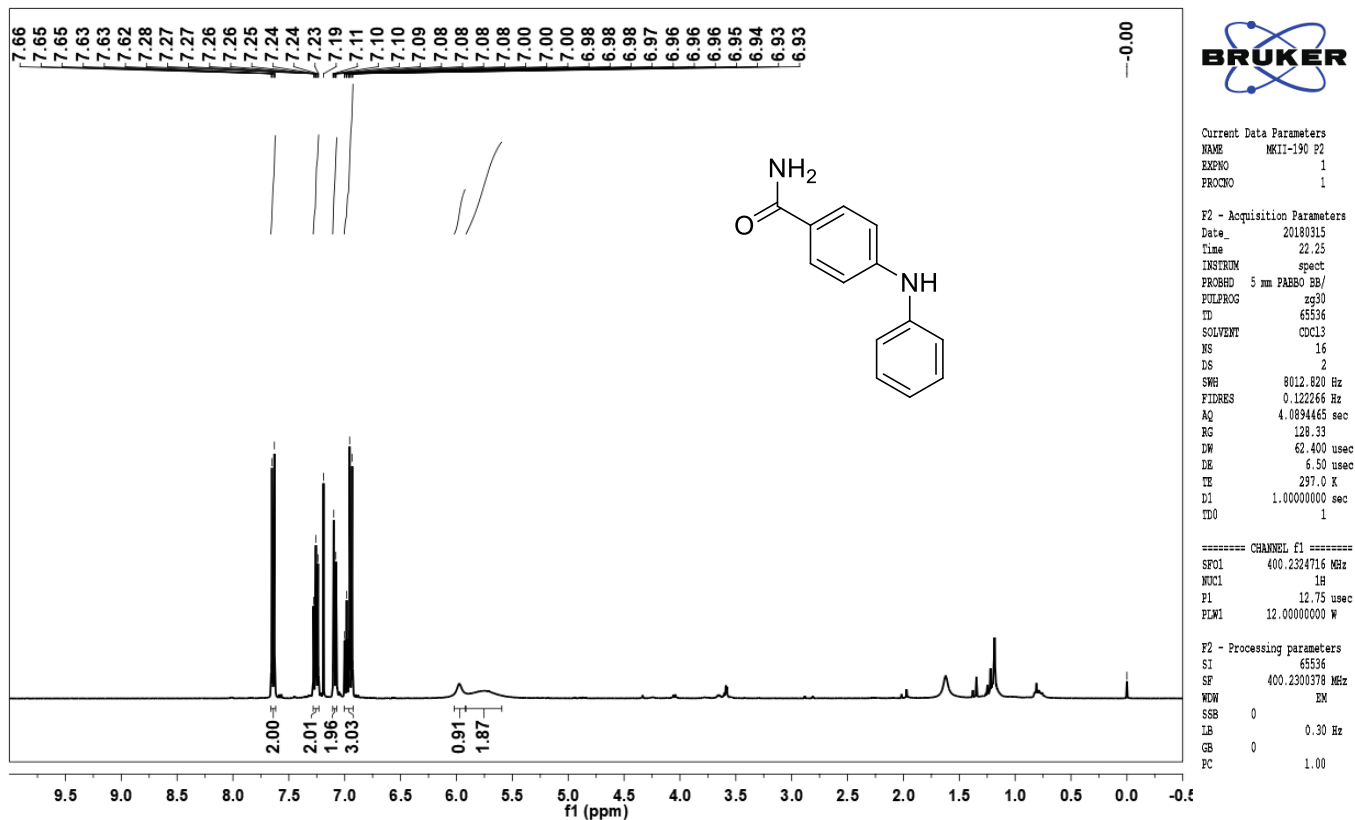

**<sup>1</sup>H NMR Spectrum of Compound 3c**

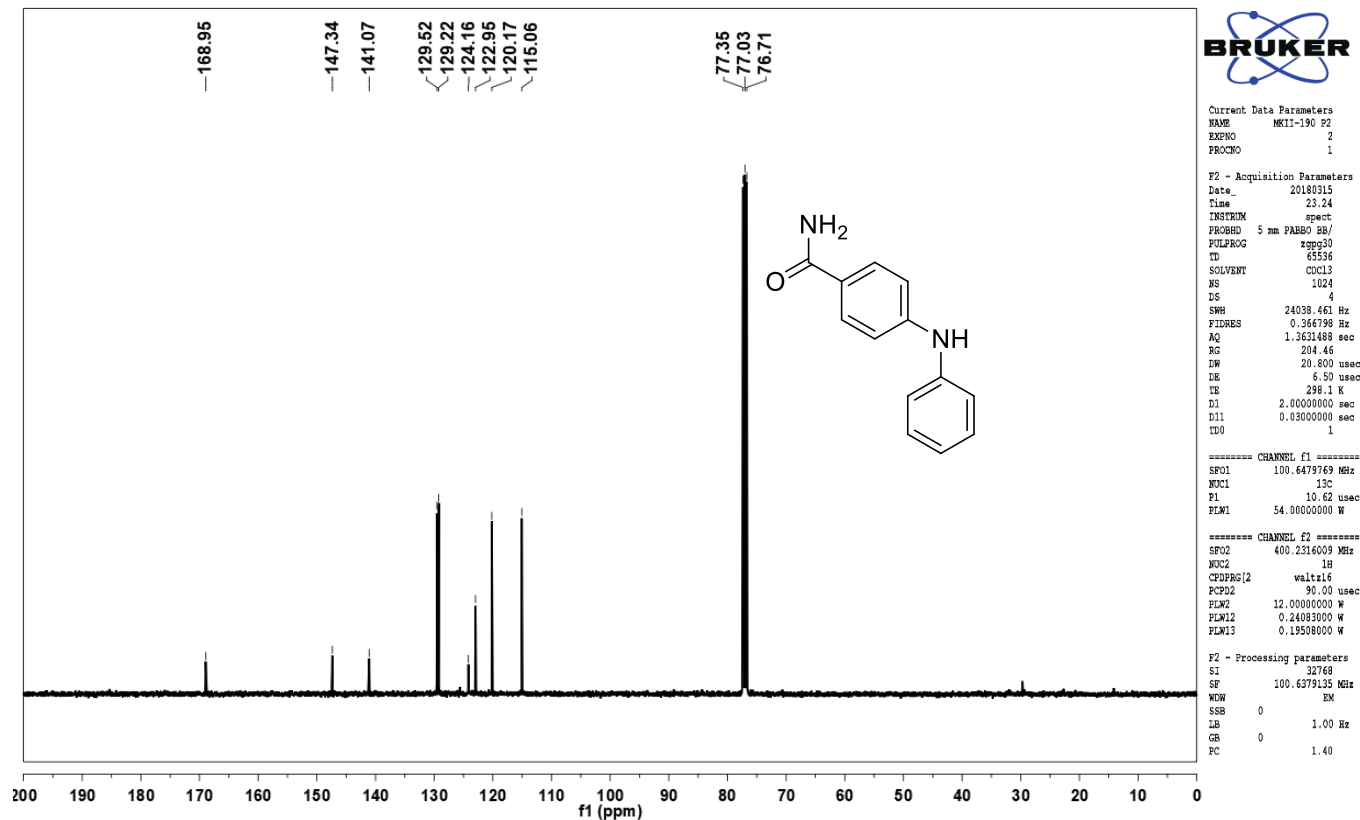

**<sup>13</sup>C NMR Spectrum of Compound 3c**

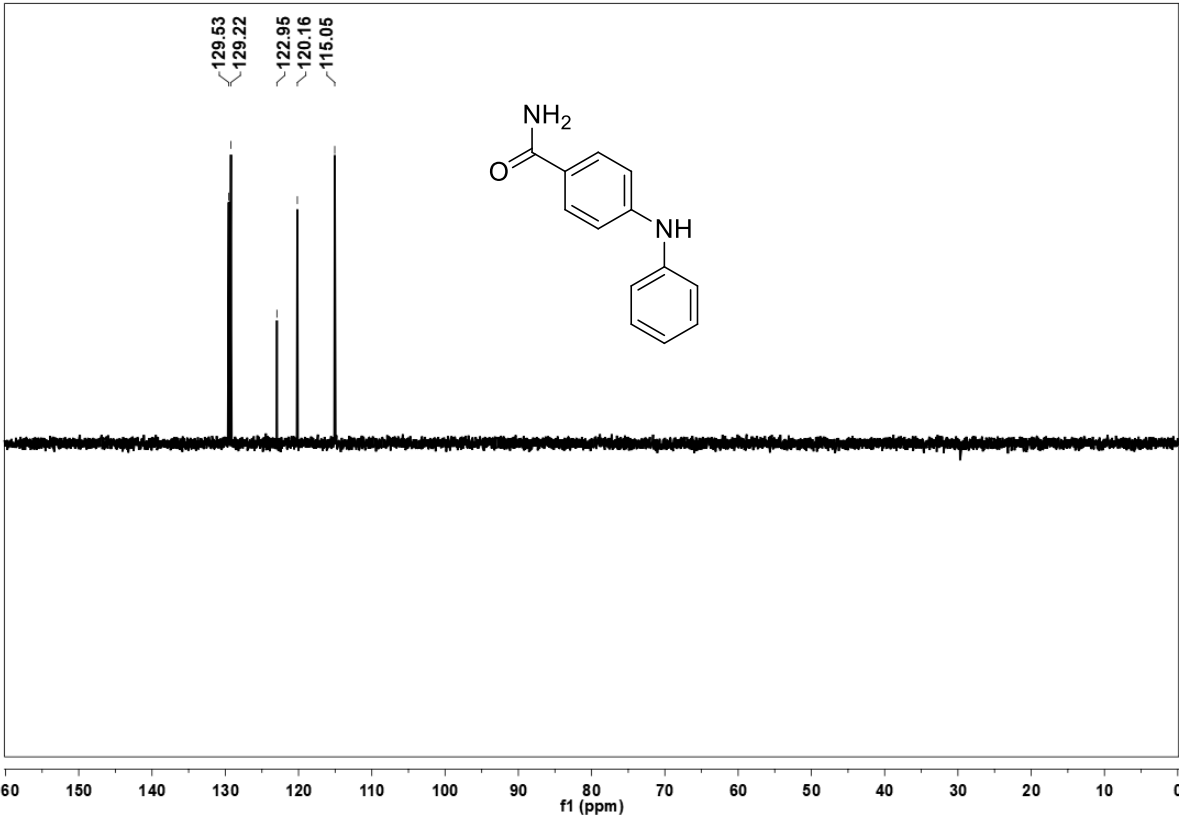

DEPT-135 NMR Spectrum of Compound 3c

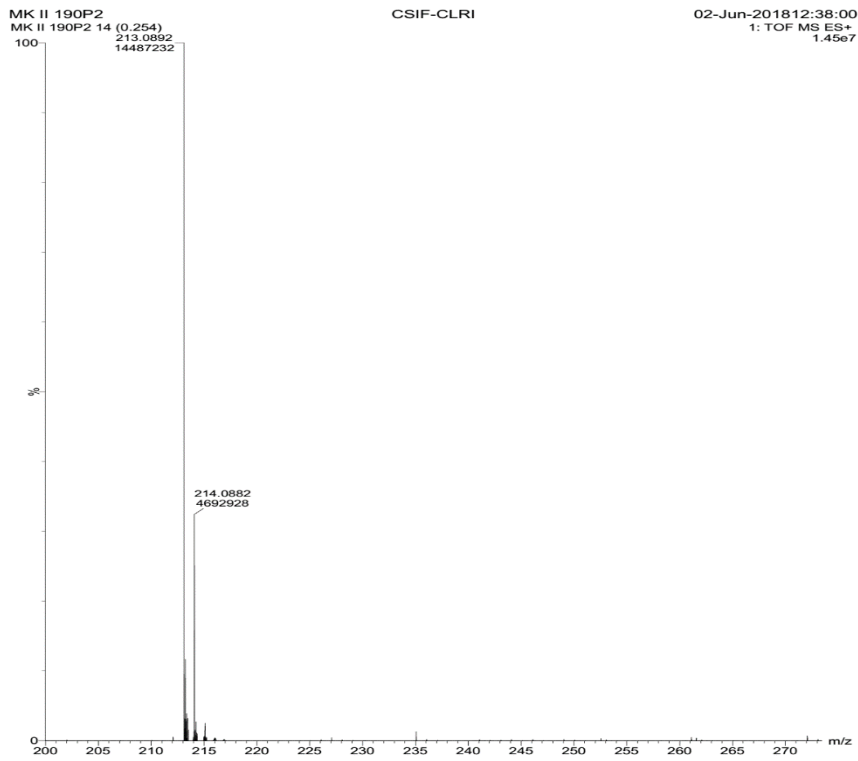

HRMS Spectrum of Compound 3c

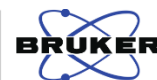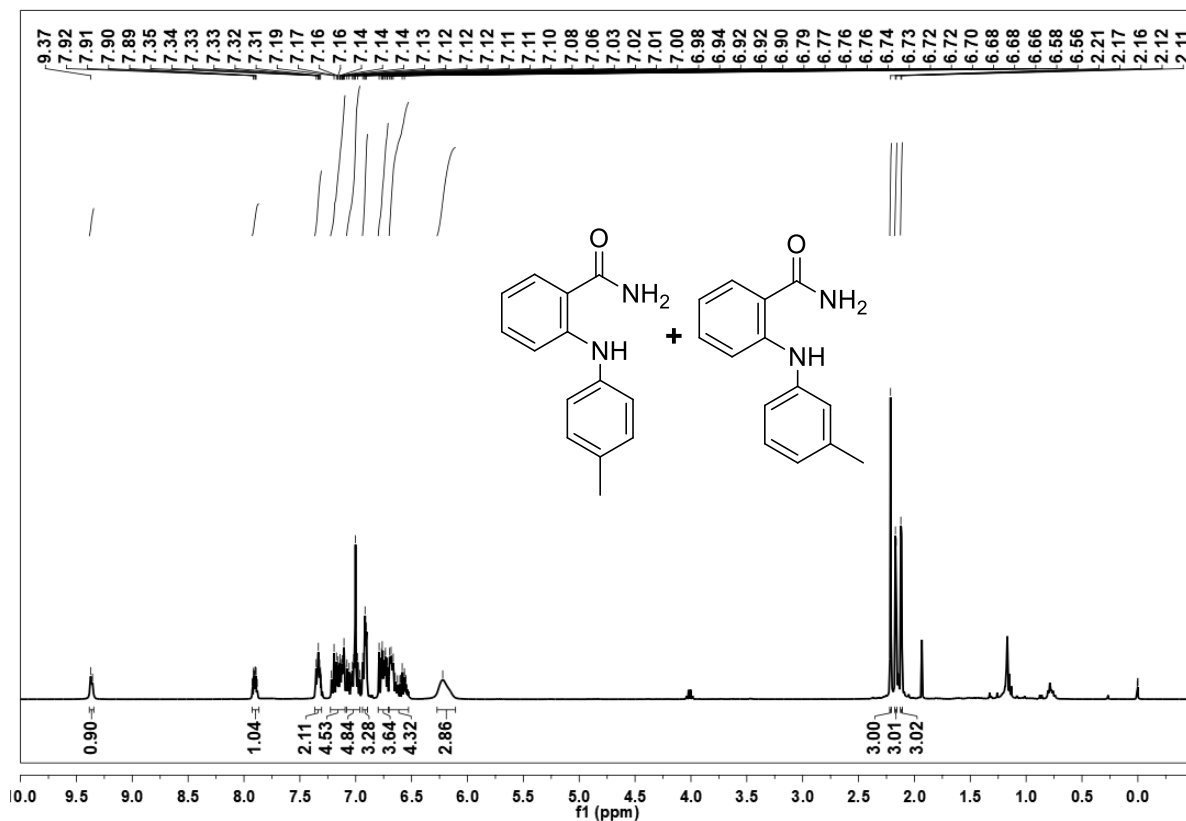

Current Data Parameters  
NAME MKII-140 P1  
EXPHO 1  
PROCNO 1

F2 - Acquisition Parameters  
Date\_ 20171205  
Time 7.45  
INSTRUM spect  
PROBHD 5 mm PABBO BB/  
PULPROG zg30  
ID 65536  
SOLVENT CDCl3  
NS 16  
DS 2  
SWH 8012.820 Hz  
FIDRES 0.122266 Hz  
AQ 4.0894465 sec  
RG 31.36  
LW 62.400 usec  
DE 6.50 usec  
TE 294.6 K  
D1 1.00000000 sec  
TD0 1

===== CHANNEL f1 =====  
SFO1 400.2324716 MHz  
NUC1 1H  
P1 12.75 usec  
PLW1 12.00000000 W

F2 - Processing parameters  
SI 65536  
SF 400.2300625 MHz  
WDW EM  
SSB 0  
LB 0.30 Hz  
GB 0  
PC 1.00

**<sup>1</sup>H NMR Spectrum of Compound 3d**

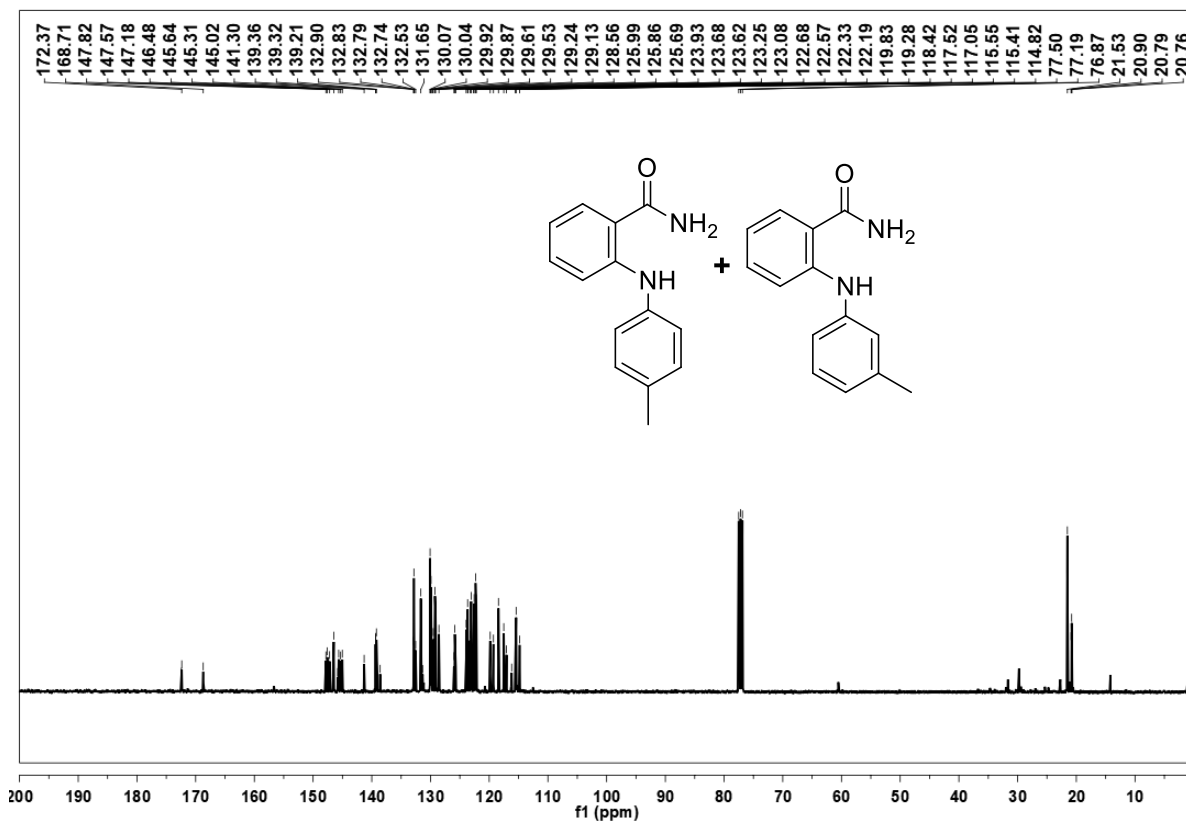

BRUKER

Current Data Parameters  
NAME MKII-140 P1  
EXPHO 2  
PROCNO 1

F2 - Acquisition Parameters  
Date\_ 20171205  
Time 8.15  
INSTRUM spect  
PROBHD 5 mm PABBO BB/  
PULPROG zgpg30  
ID 65536  
SOLVENT CDCl3  
NS 512  
DS 4  
SWH 24038.461 Hz  
FIDRES 0.366798 Hz  
AQ 1.3631488 sec  
RG 204.46  
LW 20.800 usec  
DE 6.50 usec  
TE 295.8 K  
D1 2.00000000 sec  
D11 0.83000000 sec  
TD0 1

===== CHANNEL f1 =====  
SFO1 100.6479769 MHz  
NUC1 13C  
P1 10.62 usec  
PLW1 54.00000000 W

===== CHANNEL f2 =====  
SFO2 400.2316009 MHz  
NUC2 1H  
CPCPRG2 waltz16  
PCPD2 90.00 usec  
PLW2 12.00000000 W  
PLW12 0.24083000 W  
PLW13 0.19580000 W

F2 - Processing parameters  
SI 32768  
SF 100.6379135 MHz  
WDW EM  
SSB 0  
LB 1.00 Hz  
GB 0  
PC 1.40

**<sup>13</sup>C NMR Spectrum of Compound 3d**



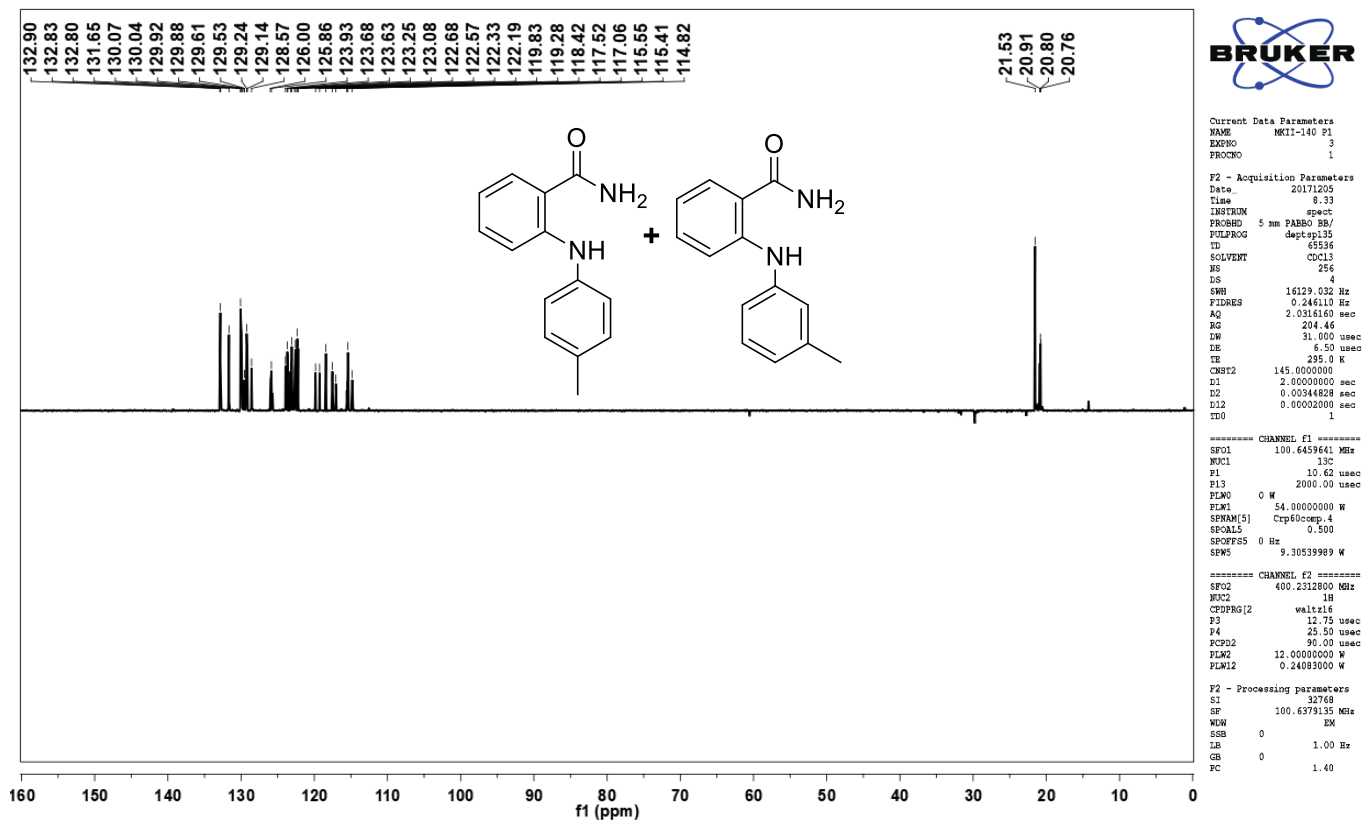

DEPT-135 NMR Spectrum of Compound 3d

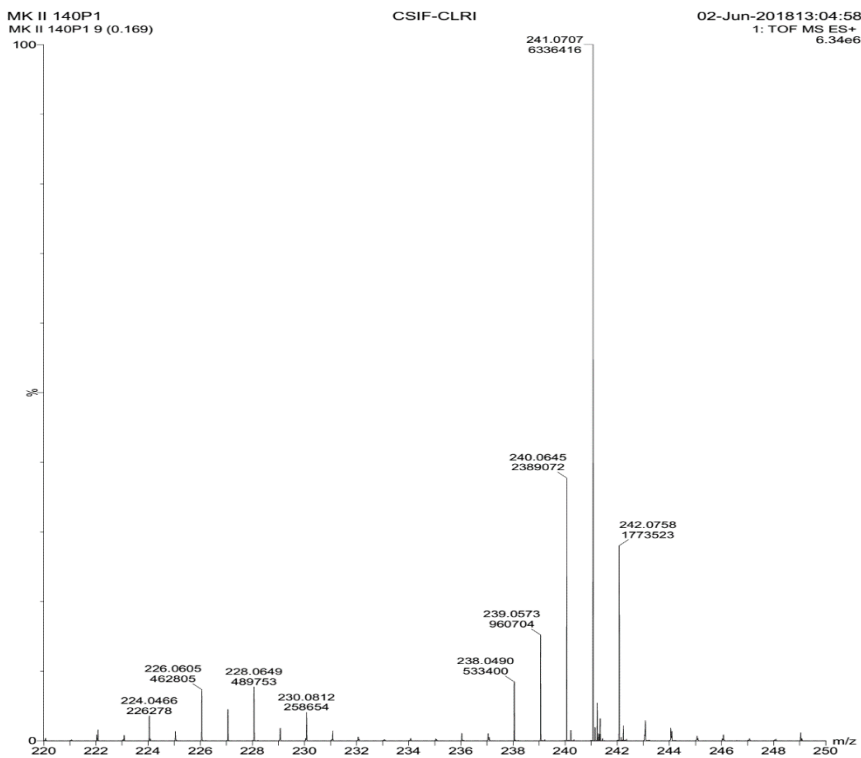

HRMS Spectrum of Compound 3d

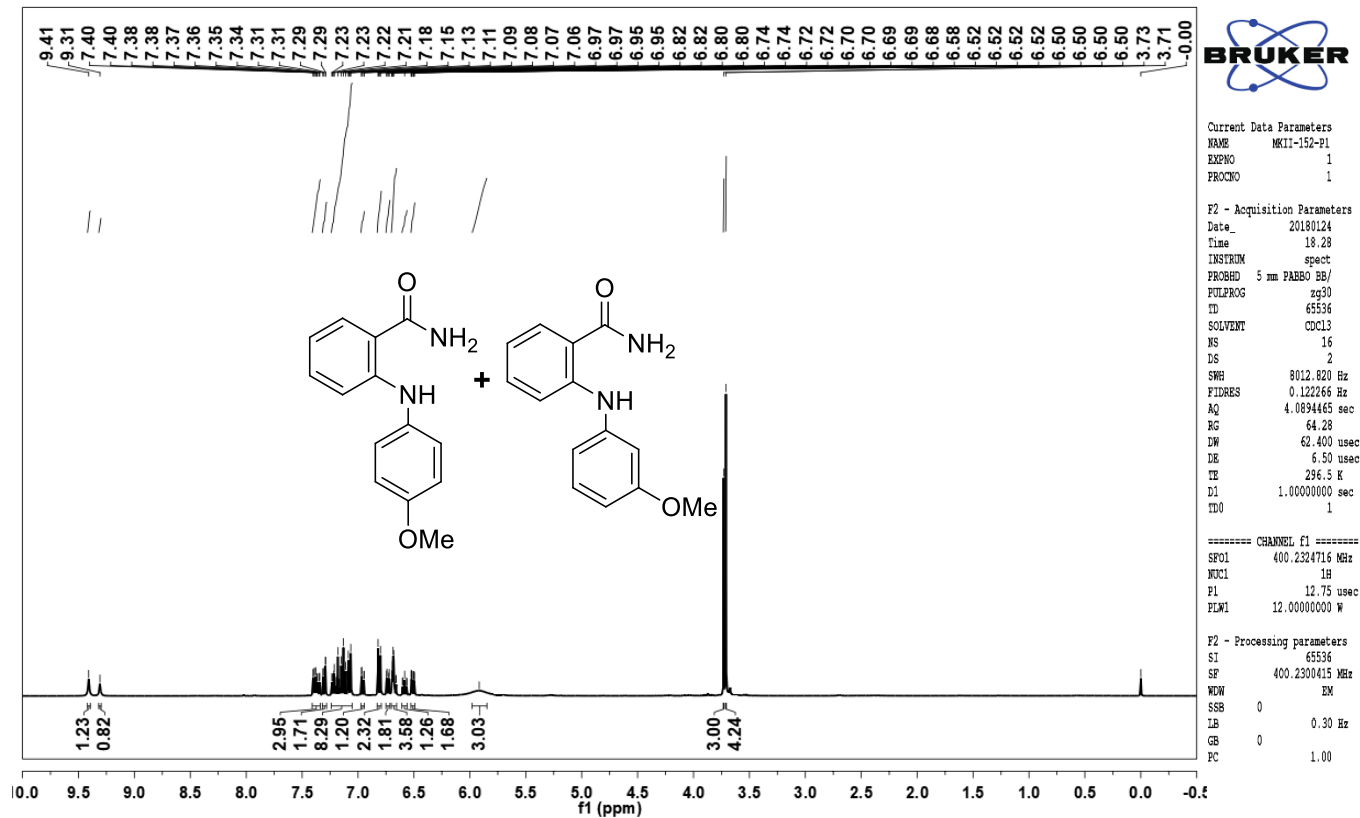

<sup>1</sup>H NMR Spectrum of Compound 3e

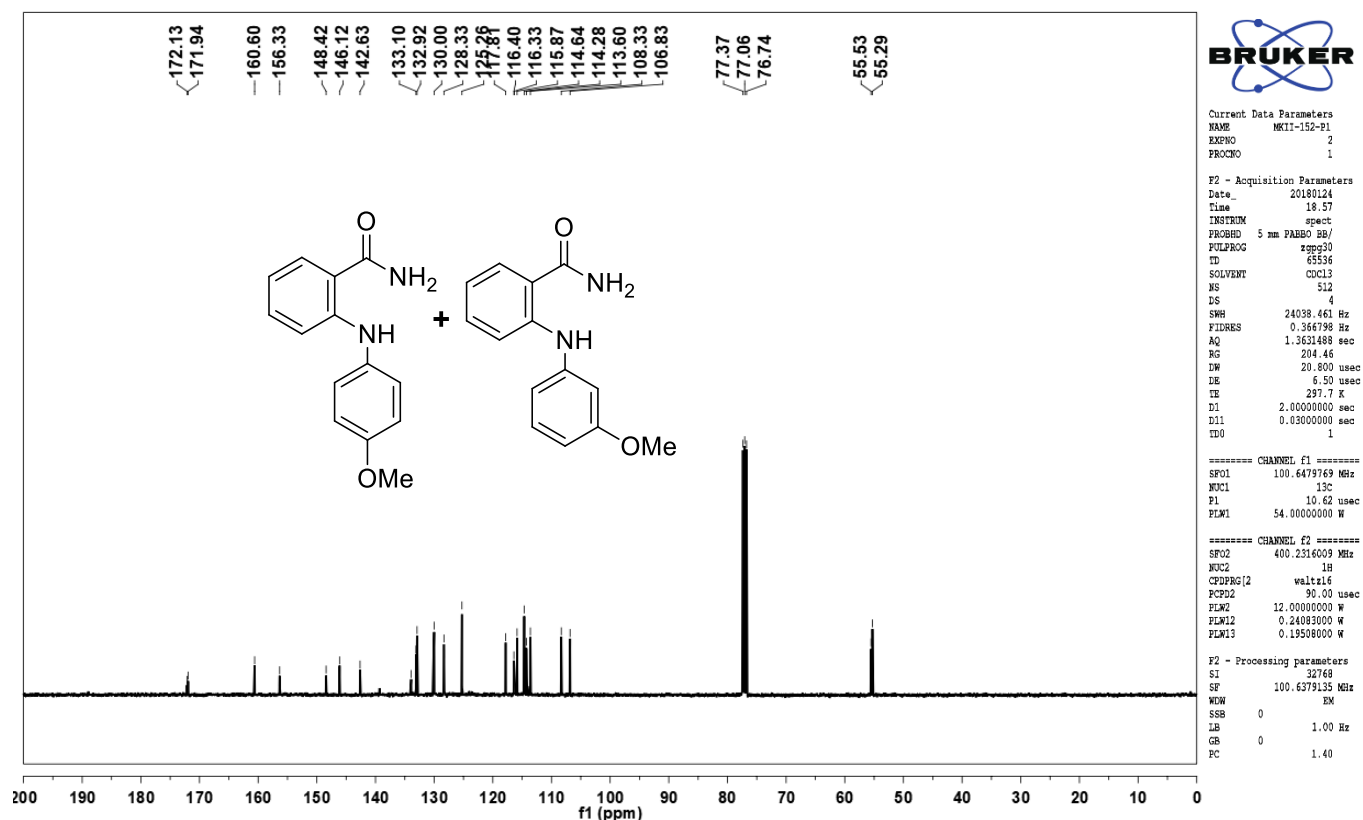

<sup>13</sup>C NMR Spectrum of Compound 3e

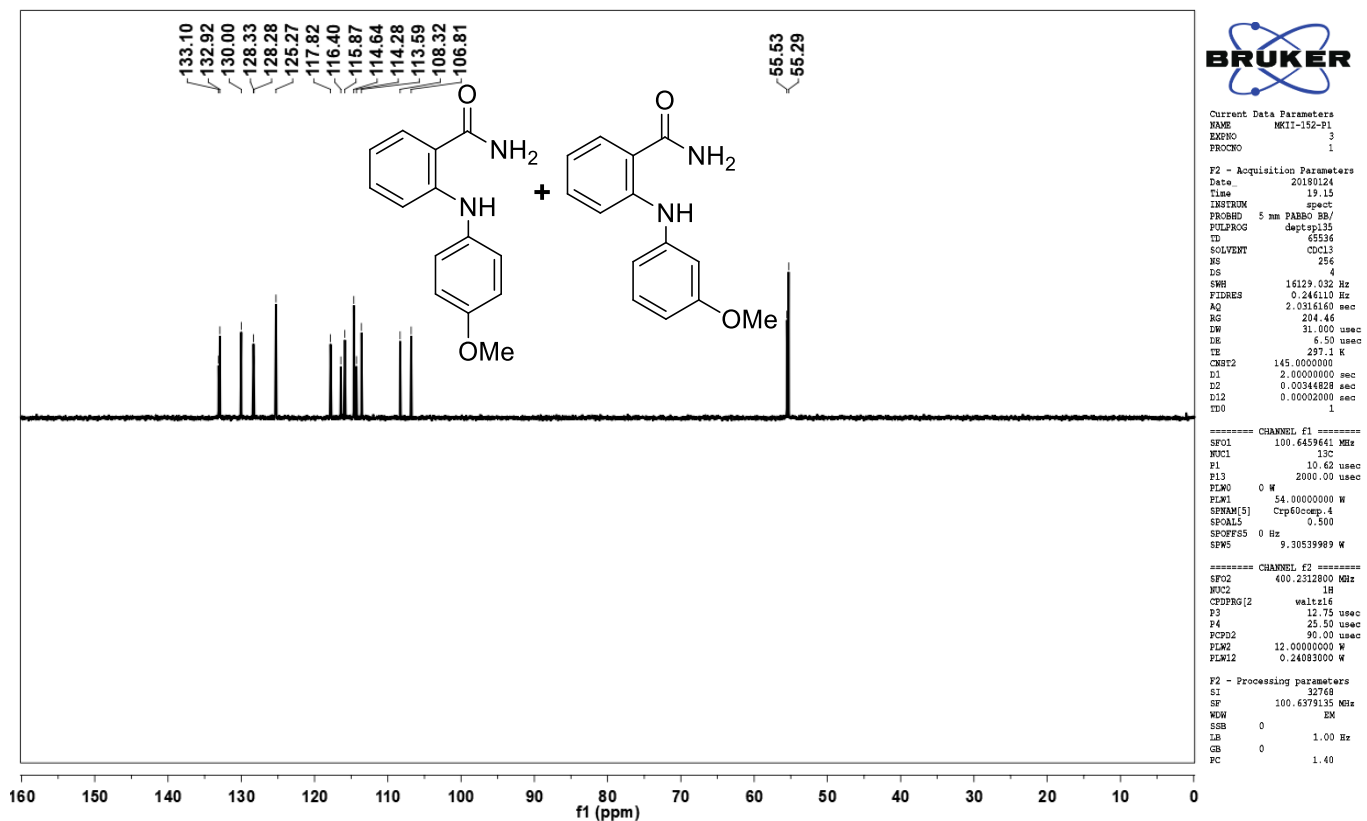

DEPT-135 NMR Spectrum of Compound 3e

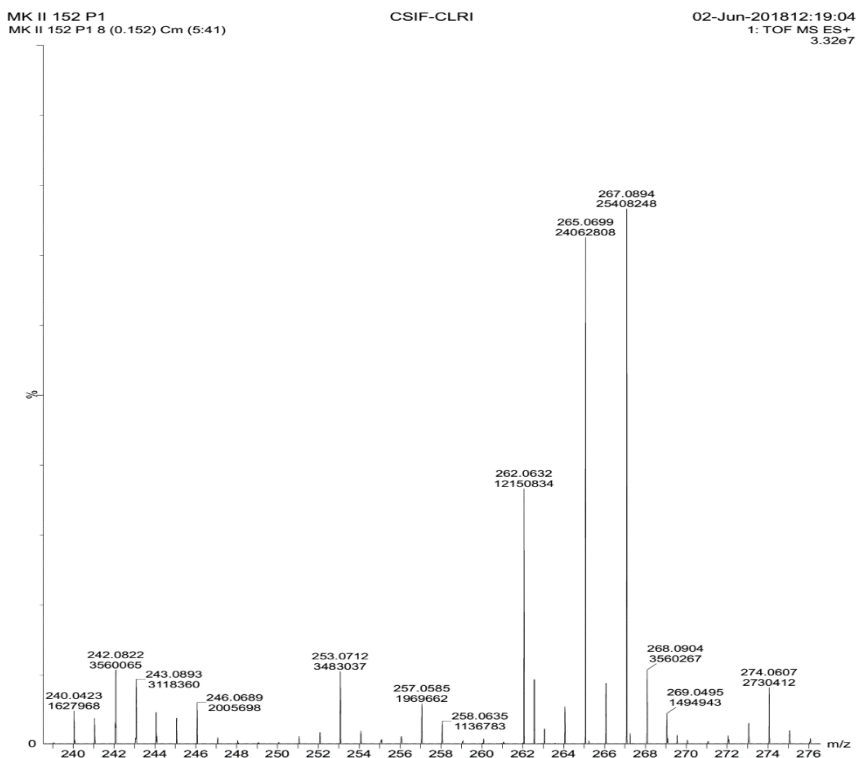

HRMS Spectrum of Compound 3e

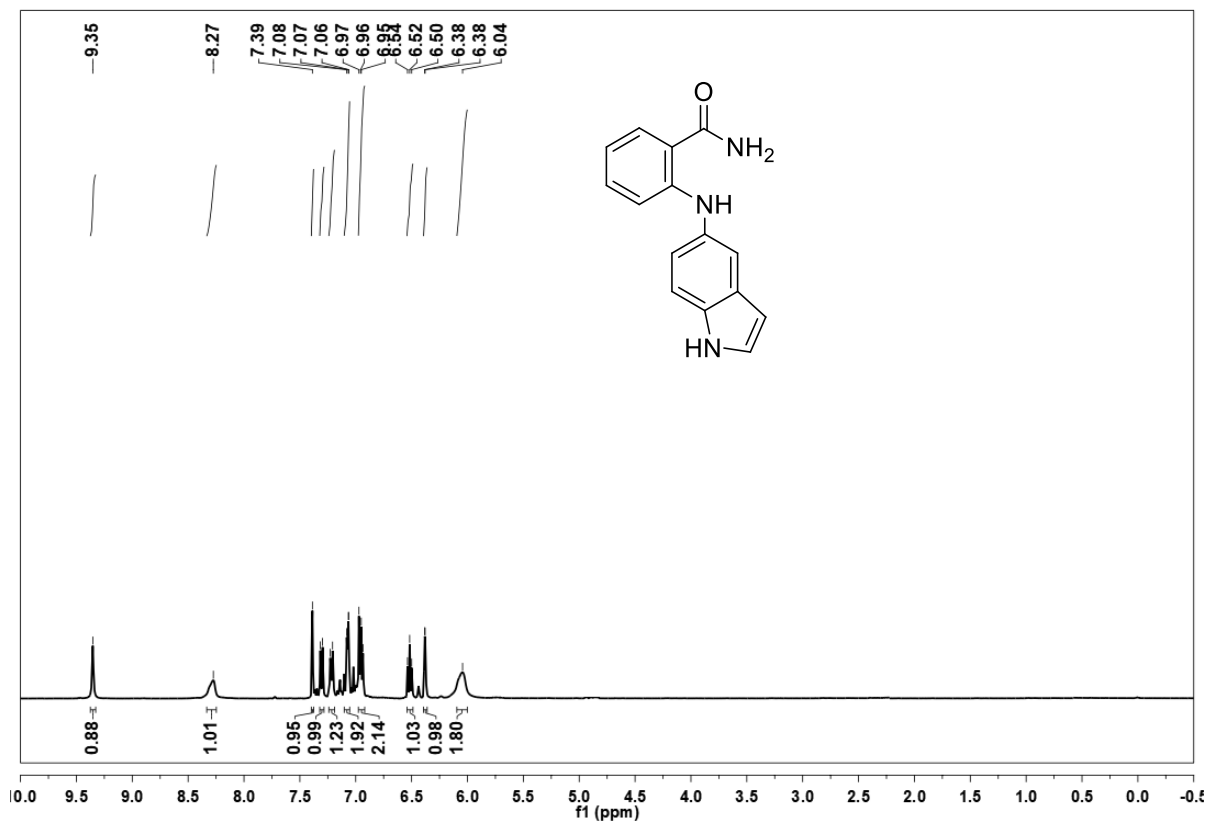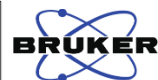

Current Data Parameters  
NAME MK11-150-P1  
EXPNO 1  
PROCNO 1

F2 - Acquisition Parameters  
Date\_ 20180101  
Time 16.24  
INSTRUM spect  
PROBHD 5 mm PABBO BB/  
PULPROG zg30  
TD 65536  
SOLVENT CDCl3  
NS 16  
DS 2  
SWH 8012.820 Hz  
FIDRES 0.122266 Hz  
AQ 4.0894465 sec  
RG 31.36  
DW 62.400 usec  
DE 6.50 usec  
TE 296.1 K  
D1 1.0000000 sec  
TD0 1

===== CHANNEL f1 =====  
SFO1 400.2324716 MHz  
NUC1 1H  
P1 12.75 usec  
PLW1 12.0000000 W

F2 - Processing parameters  
SI 65536  
SF 400.2301577 MHz  
WDW EM  
SSB 0  
LB 0.30 Hz  
GB 0  
PC 1.00

<sup>1</sup>H NMR Spectrum of Compound 3f

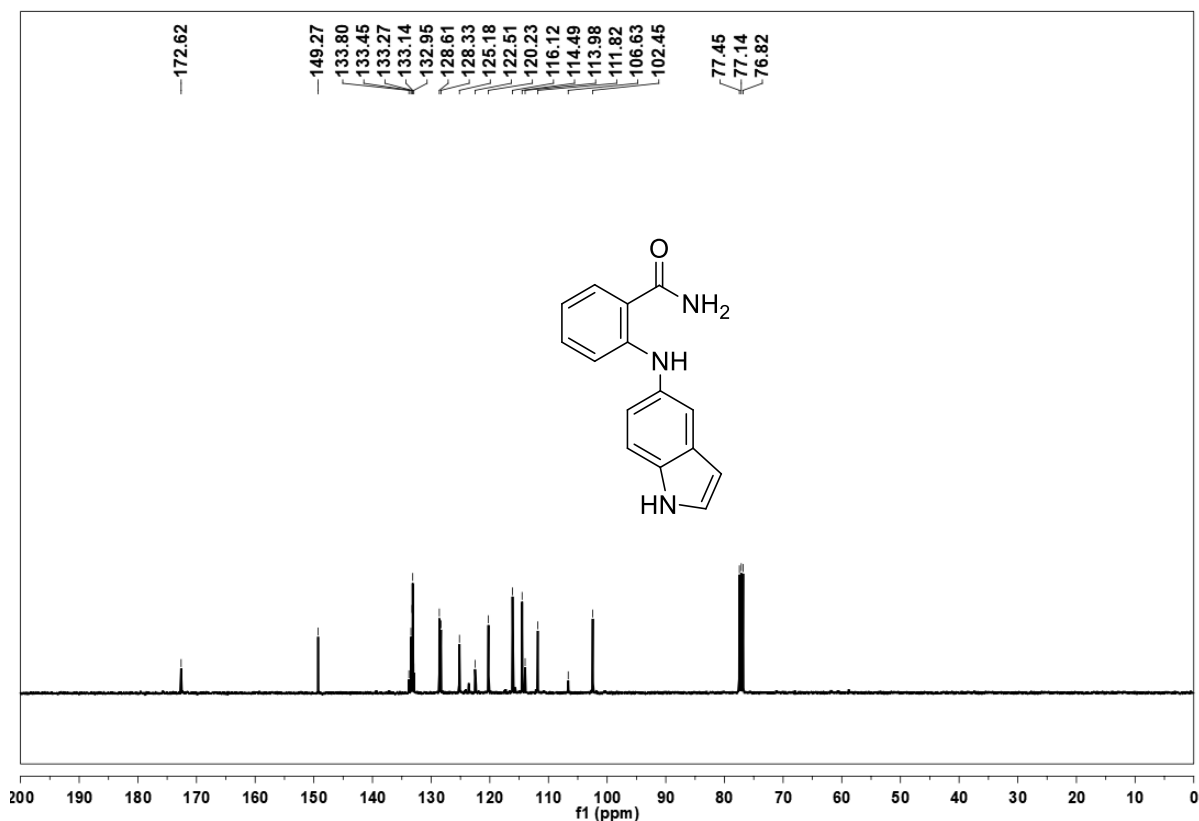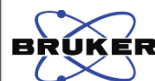

Current Data Parameters  
NAME MK11-150-P1  
EXPNO 2  
PROCNO 1

F2 - Acquisition Parameters  
Date\_ 20180101  
Time 16.54  
INSTRUM spect  
PROBHD 5 mm PABBO BB/  
PULPROG zgpg30  
TD 65536  
SOLVENT CDCl3  
NS 512  
DS 4  
SWH 24038.461 Hz  
FIDRES 0.366798 Hz  
AQ 1.3631488 sec  
RG 204.46  
LW 20.800 usec  
DE 6.50 usec  
TE 297.1 K  
D1 2.0000000 sec  
D11 0.0300000 sec  
TD0 1

===== CHANNEL f1 =====  
SFO1 100.6479769 MHz  
NUC1 13C  
P1 10.62 usec  
PLW1 54.0000000 W

===== CHANNEL f2 =====  
SFO2 400.2316009 MHz  
NUC2 1H  
CPDPRG2 waltz16  
PCPD2 90.00 usec  
PLW2 12.0000000 W  
PLW12 0.24083000 W  
PLW13 0.15508000 W

F2 - Processing parameters  
SI 32768  
SF 100.6379135 MHz  
WDW EM  
SSB 0  
LB 1.00 Hz  
GB 0  
PC 1.40

<sup>13</sup>C NMR Spectrum of Compound 3f

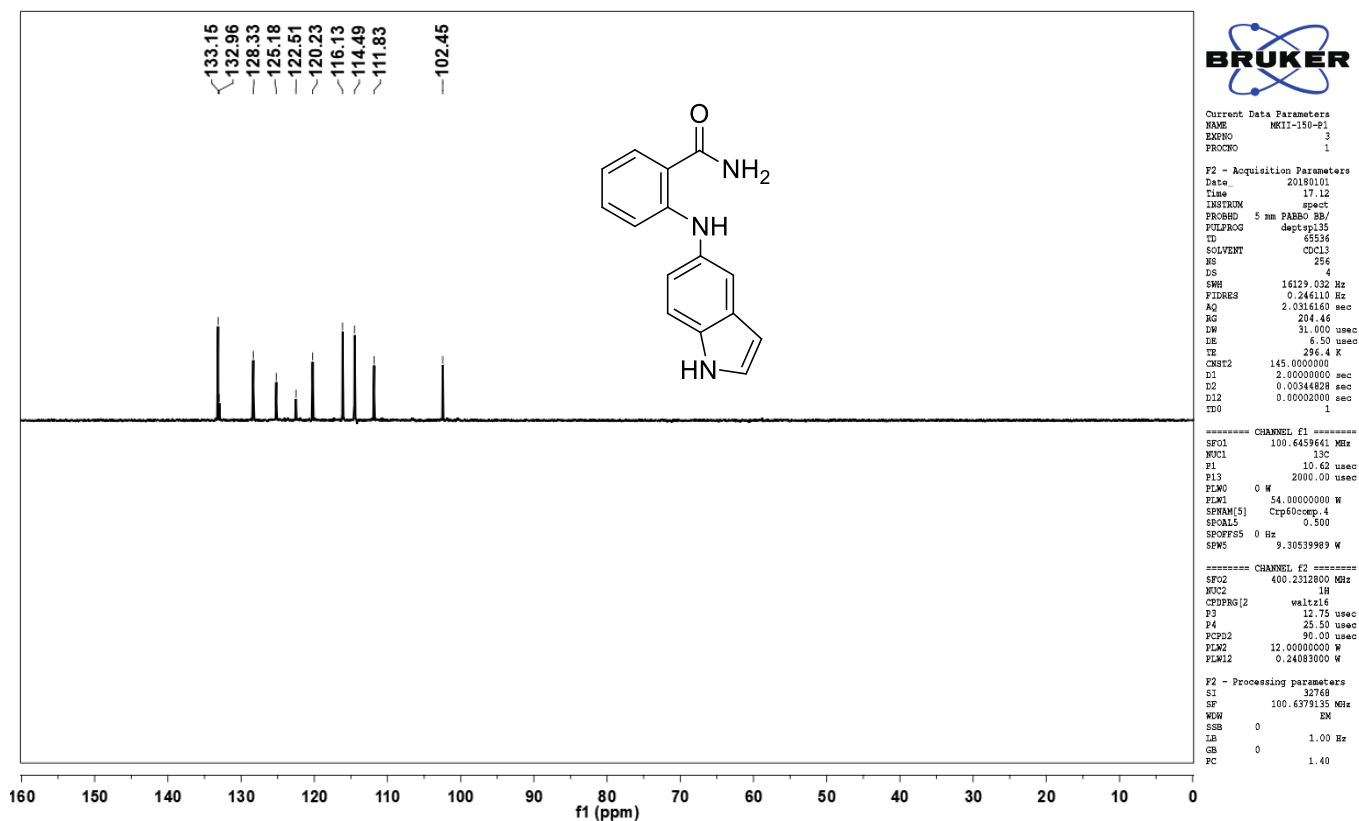

DEPT-135 NMR Spectrum of Compound 3f

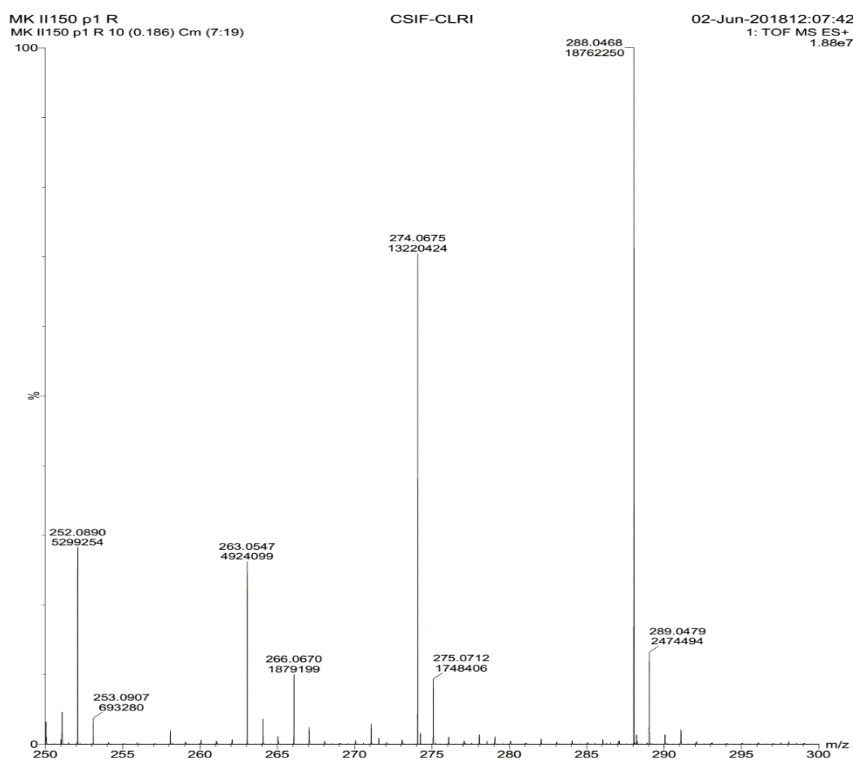

HRMS Spectrum of Compound 3f

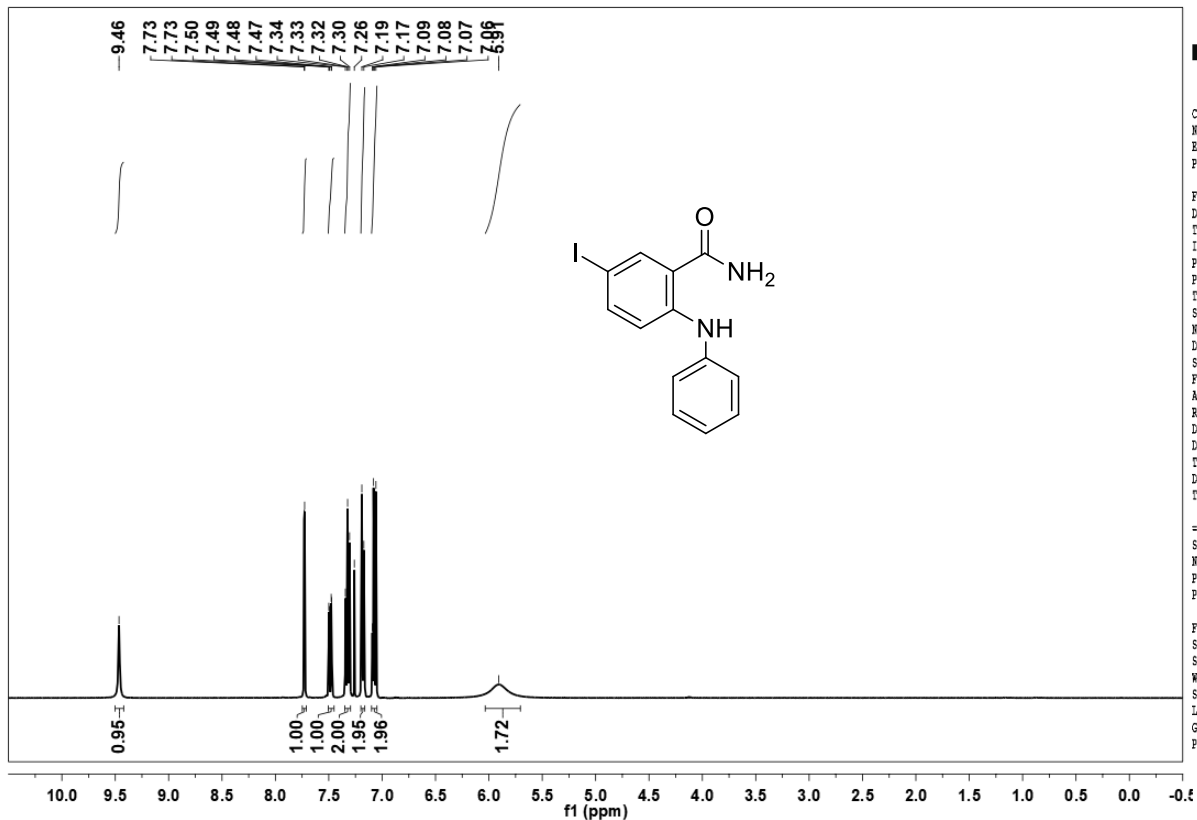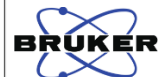

Current Data Parameters  
 NAME MKII-142-p1  
 EXPMO 1  
 PROCNO 1

F2 - Acquisition Parameters  
 Date\_ 20171207  
 Time 19.51  
 INSTRUM spect  
 PROBHD 5 mm PABBO BB/  
 PULPROG zg30  
 TD 65536  
 SOLVENT CDCl3  
 NS 16  
 DS 2  
 SWH 8012.820 Hz  
 FIDRES 0.122266 Hz  
 AQ 4.0894465 sec  
 RG 128.33  
 DW 62.400 usec  
 DE 6.50 usec  
 TE 294.9 K  
 D1 1.0000000 sec  
 TDO 1

==== CHANNEL f1 =====  
 SF01 400.2324716 MHz  
 NUC1 1H  
 P1 12.75 usec  
 PLW1 12.0000000 W

F2 - Processing parameters  
 SI 65536  
 SF 400.2300000 MHz  
 WDW EM  
 SSB 0  
 LB 0.30 Hz  
 GB 0  
 PC 1.00

**1H NMR Spectrum of Compound 3g**

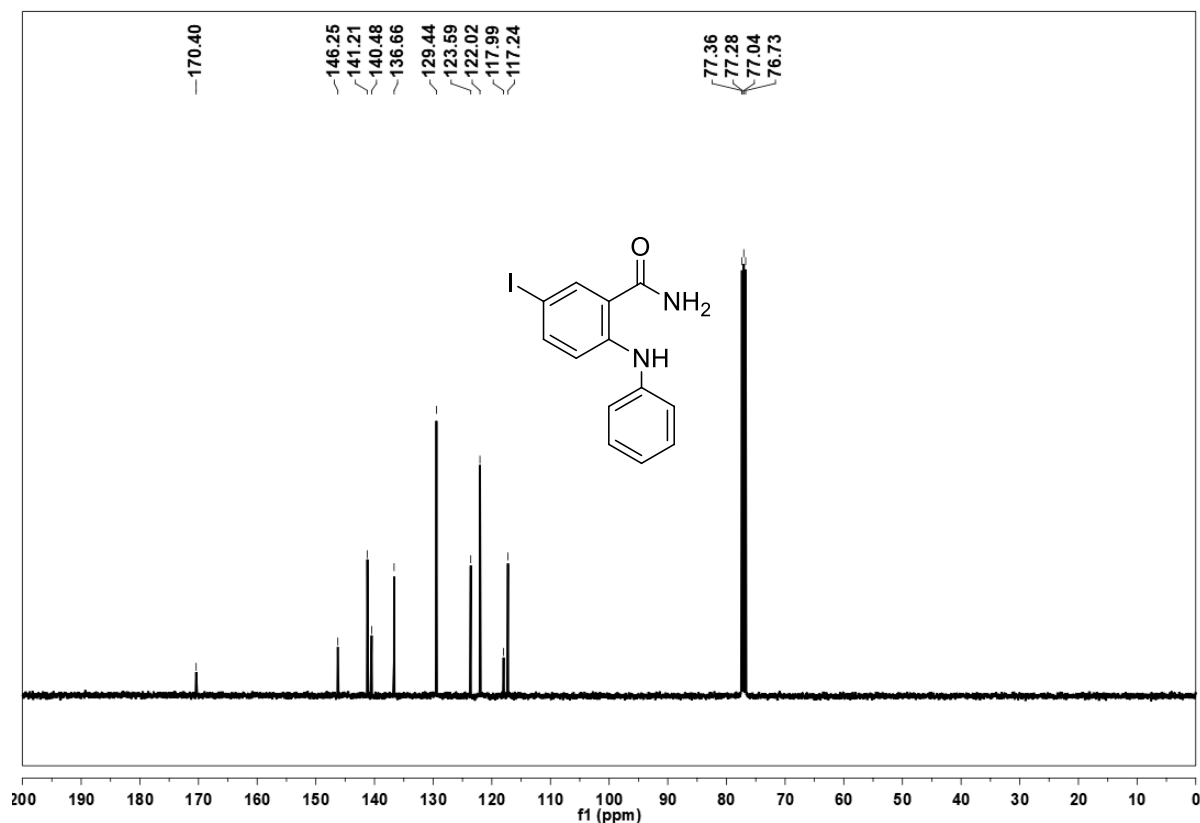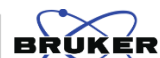

Current Data Parameters  
 NAME MKII-142-p1  
 EXPMO 2  
 PROCNO 1

F2 - Acquisition Parameters  
 Date\_ 20171207  
 Time 20.20  
 INSTRUM spect  
 PROBHD 5 mm PABBO BB/  
 PULPROG zgpg30  
 TD 65536  
 SOLVENT CDCl3  
 NS 512  
 DS 4  
 SWH 24038.461 Hz  
 FIDRES 0.366798 Hz  
 AQ 1.3631488 sec  
 RG 204.46  
 DW 20.800 usec  
 DE 6.50 usec  
 TE 296.4 K  
 D1 2.0000000 sec  
 D11 0.0300000 sec  
 TDO 1

==== CHANNEL f1 =====  
 SF01 100.6479769 MHz  
 NUC1 13C  
 P1 10.62 usec  
 PLW1 54.0000000 W

==== CHANNEL f2 =====  
 SF02 400.2316009 MHz  
 NUC2 1H  
 WALTZ16  
 PCPFG[2] waltz16  
 PLW2 12.0000000 W  
 PLW12 0.24083000 W  
 PLW13 0.19508000 W

F2 - Processing parameters  
 SI 32768  
 SF 100.6379135 MHz  
 WDW EM  
 SSB 0  
 LB 1.00 Hz  
 GB 0  
 PC 1.40

**13C NMR Spectrum of Compound 3g**

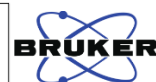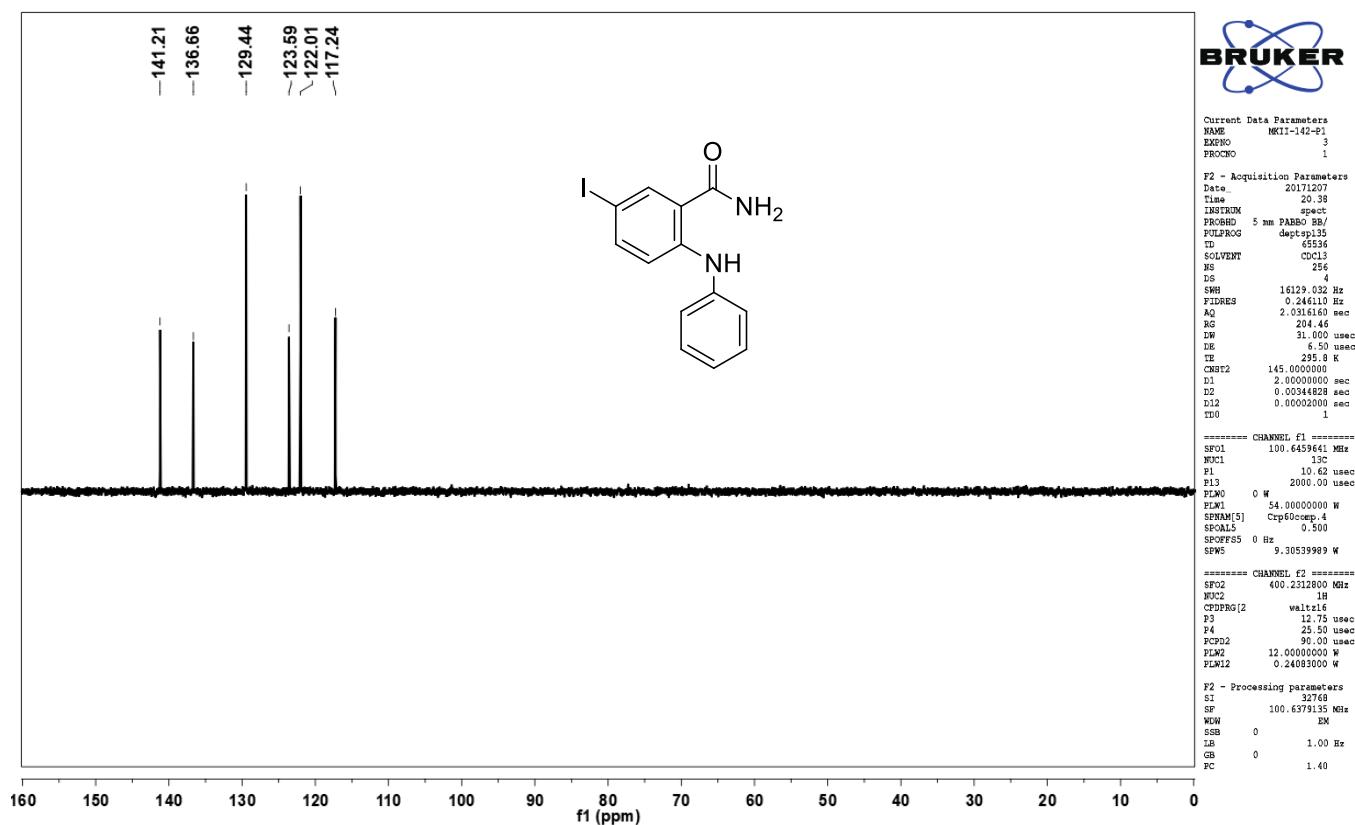

DEPT-135 NMR Spectrum of Compound 3g

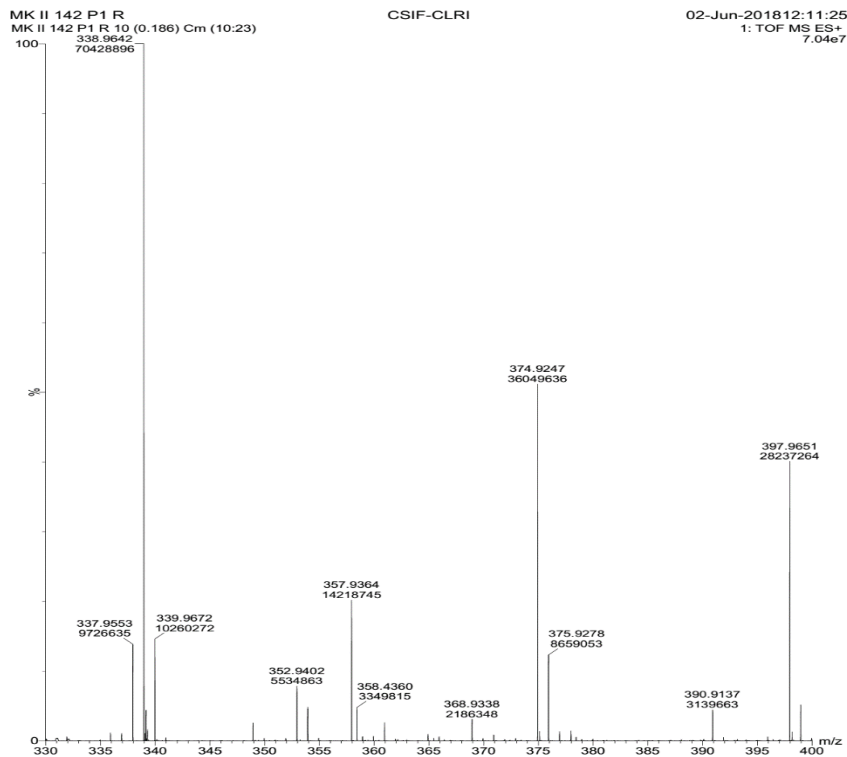

HRMS Spectrum of Compound 3g

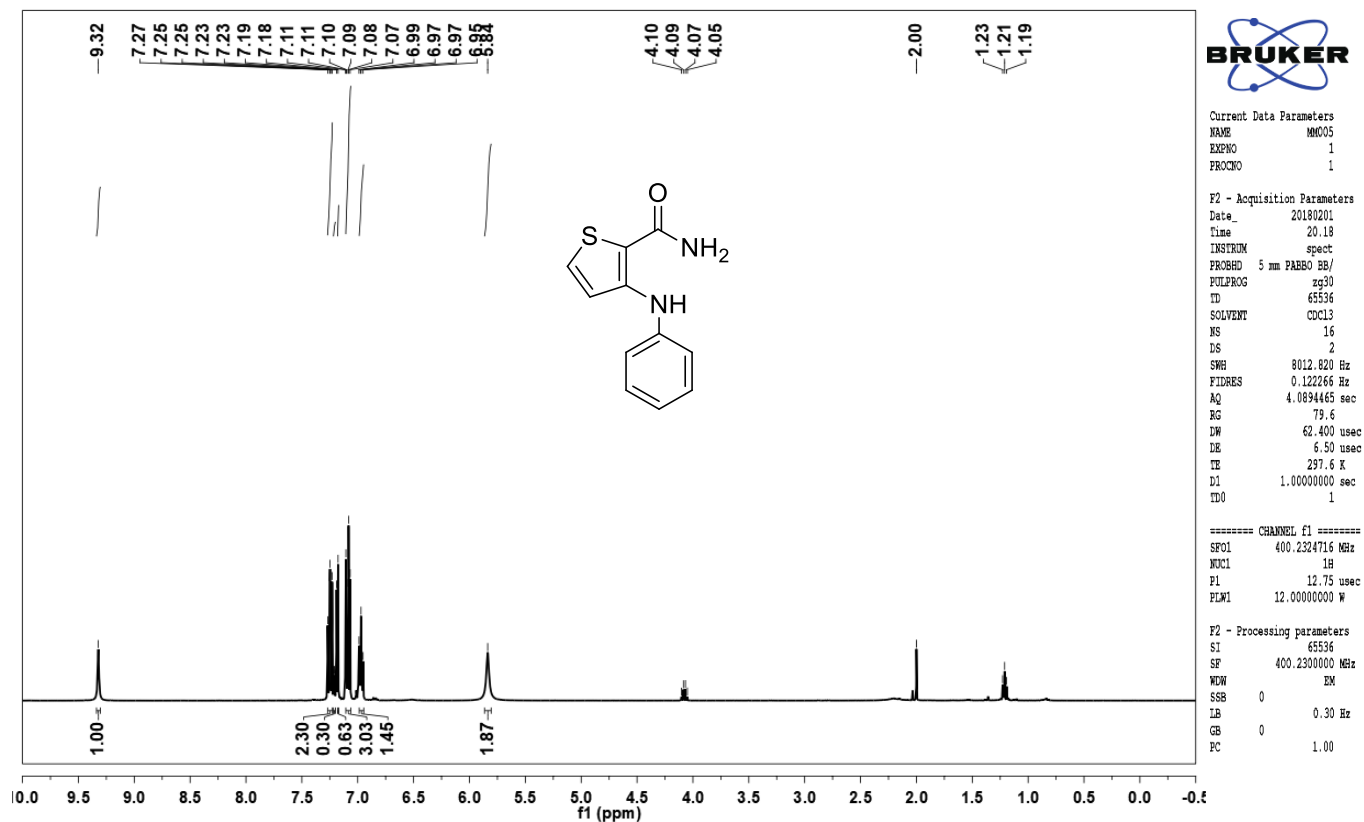

**<sup>1</sup>H NMR Spectrum of Compound 3h**

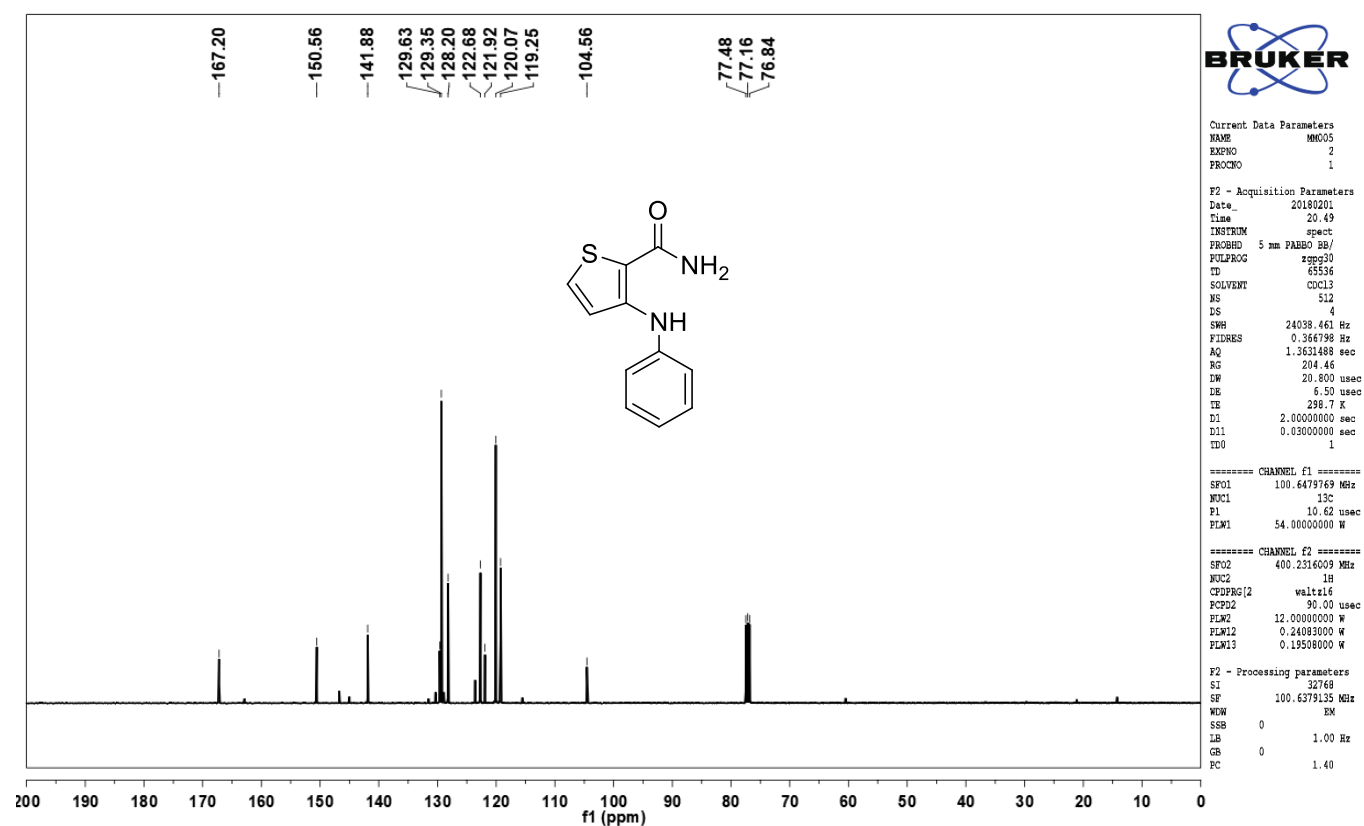

**<sup>13</sup>C NMR Spectrum of Compound 3h**



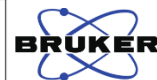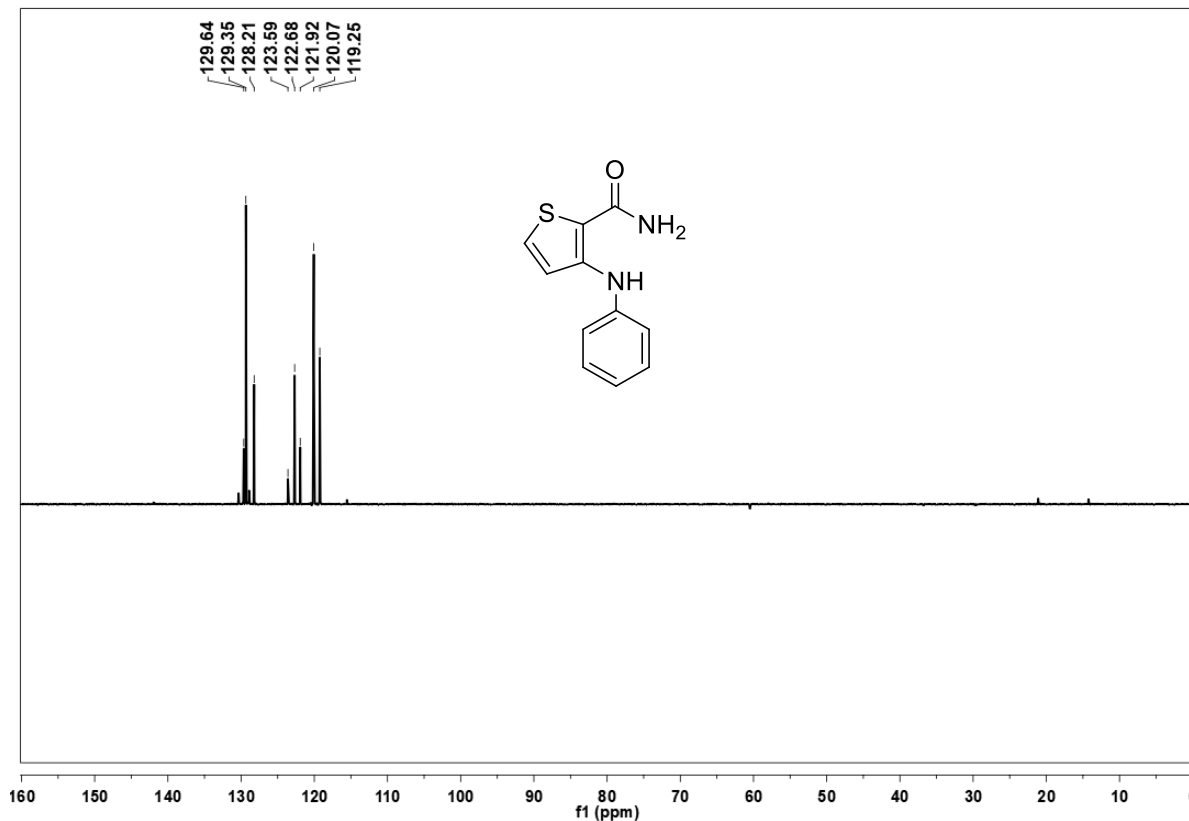

DEPT-135 NMR Spectrum of Compound **3h**

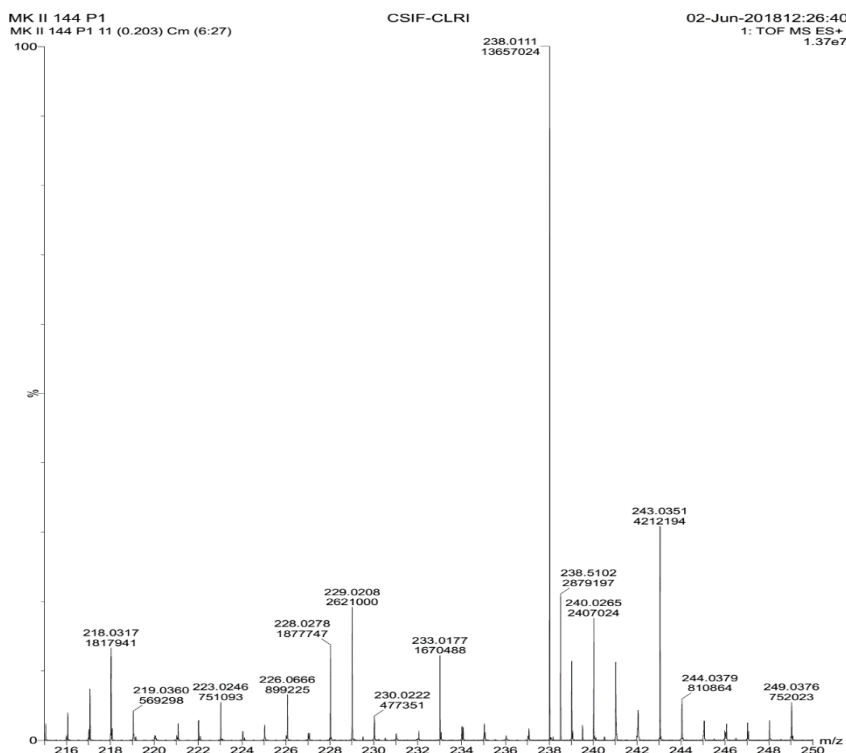

HRMS Spectrum of Compound **3h**

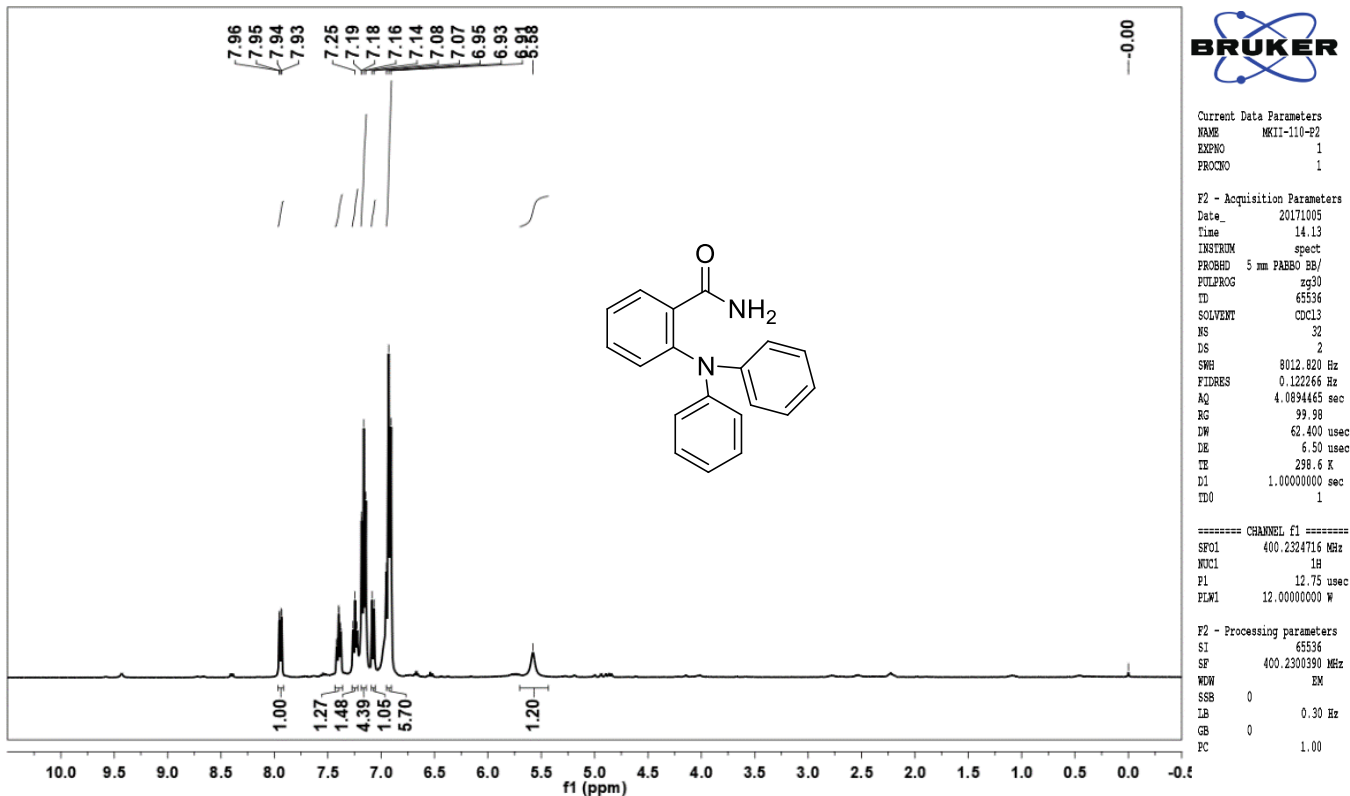

<sup>1</sup>H NMR Spectrum of Compound **4a**

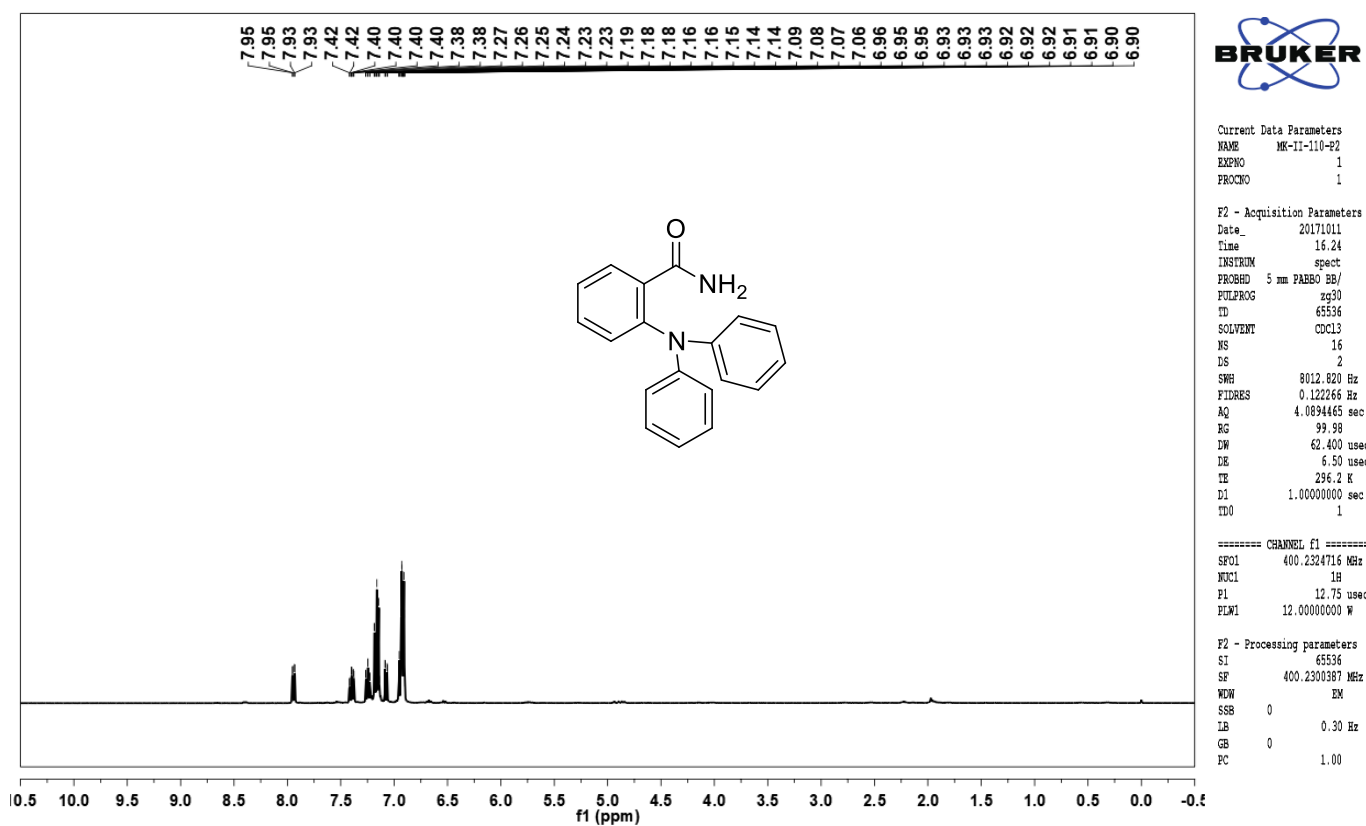

<sup>1</sup>H NMR Spectrum of Compound **4a** (D<sub>2</sub>O exchange experiment)

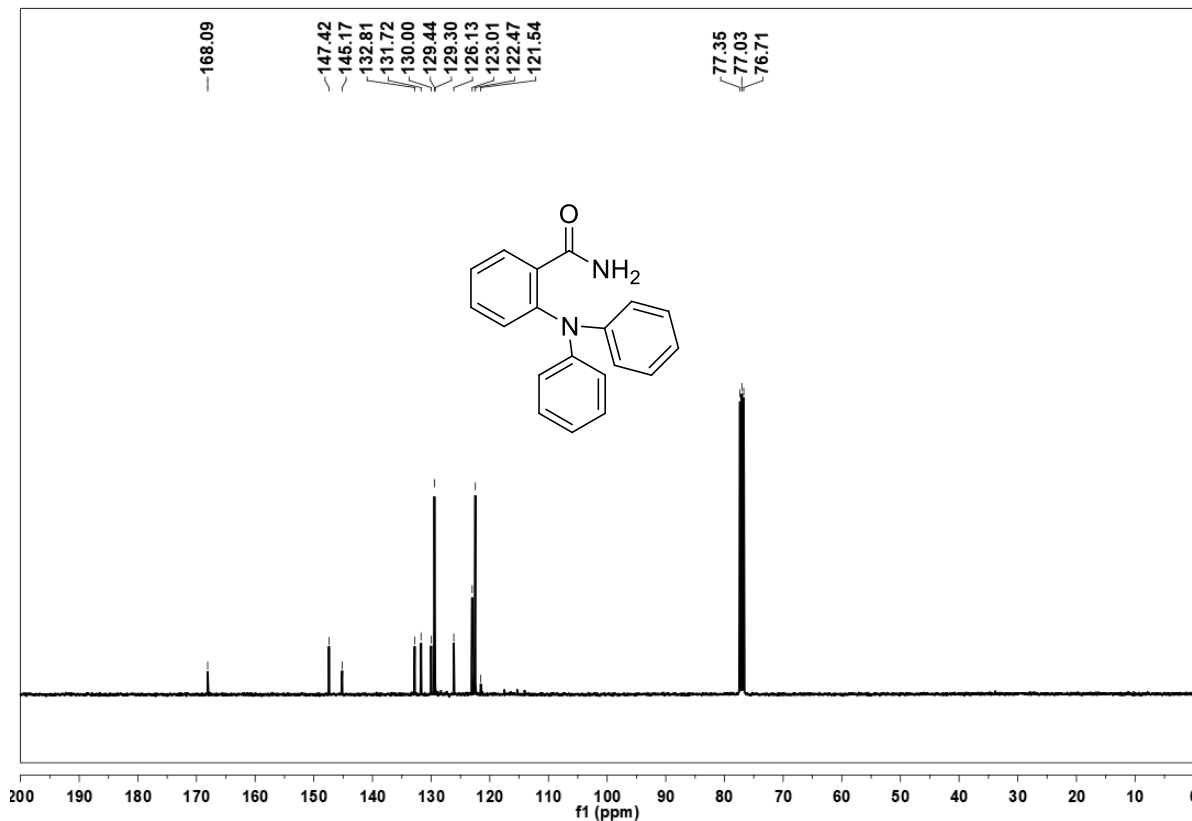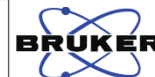

Current Data Parameters  
 NAME MKII-110-P2  
 EXPHO 2  
 PROCNO 1

F2 - Acquisition Parameters  
 Date\_ 20171005  
 Time 15.13  
 INSTRUM spect  
 PROBHD 5 mm PABBO BB/  
 PULPROG zgpg30  
 TD 65536  
 SOLVENT cdcl3  
 NS 1024  
 DS 4  
 SWH 24038.461 Hz  
 FIDRES 0.366798 Hz  
 AQ 1.3621488 sec  
 RG 204.46  
 DW 20.800 usec  
 DE 6.50 usec  
 TE 298.1 K  
 D1 2.0000000 sec  
 D11 0.0300000 sec  
 TD0 1

==== CHANNEL f1 =====  
 SF01 100.6479769 MHz  
 NUC1 13C  
 P1 10.62 usec  
 PLW1 54.0000000 W  
 ===== CHANNEL f2 =====  
 SF02 400.2316009 MHz  
 NUC2 1H  
 CPDPRG2 waltz16  
 PCPD2 90.00 usec  
 PLW2 12.0000000 W  
 PLW3 0.24083000 W  
 PLW13 0.19508000 W

F2 - Processing parameters  
 SI 32768  
 SF 100.6379135 MHz  
 WDW EM  
 SSB 0  
 LB 1.00 Hz  
 GB 0  
 FC 1.40

<sup>13</sup>C NMR Spectrum of Compound 4a

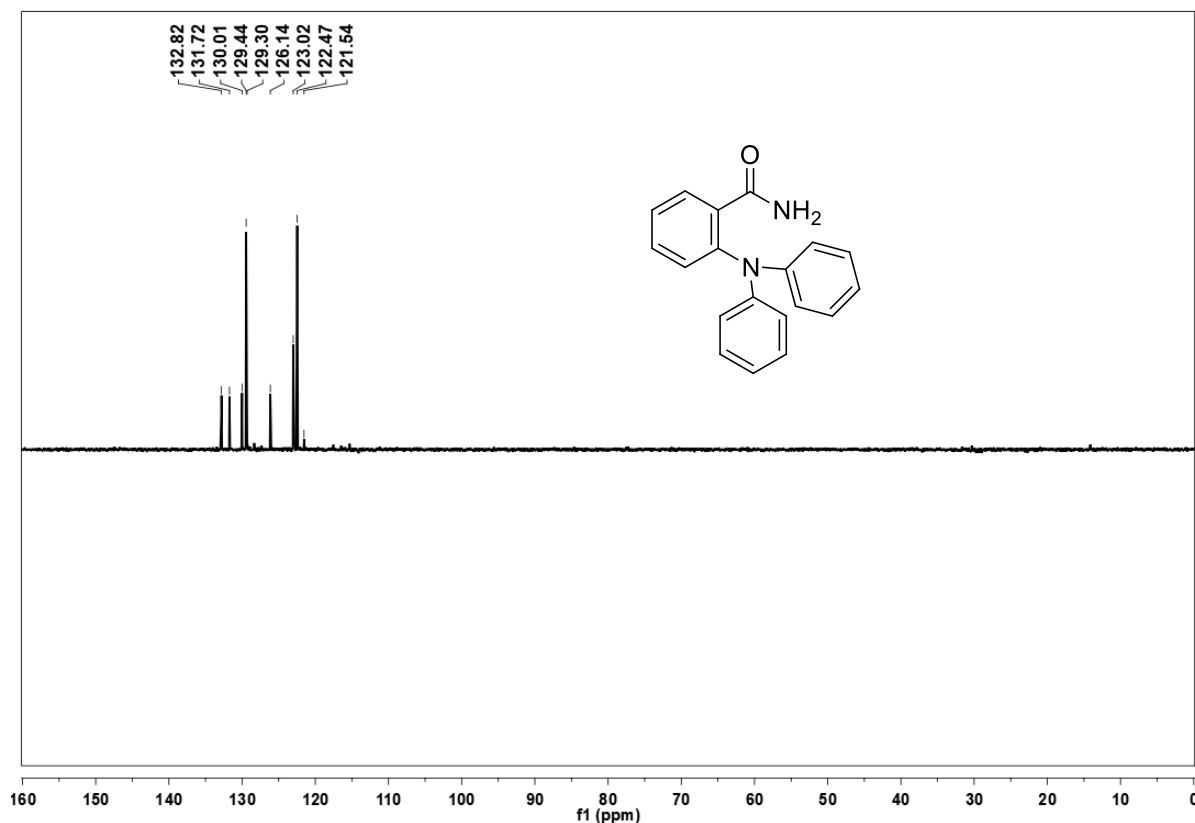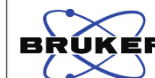

Current Data Parameters  
 NAME MKII-110-P2  
 EXPHO 3  
 PROCNO 1

F2 - Acquisition Parameters  
 Date\_ 20171005  
 Time 15.48  
 INSTRUM spect  
 PROBHD 5 mm PABBO BB/  
 PULPROG deptcp135  
 TD 65536  
 SOLVENT cdcl3  
 NS 512  
 DS 4  
 SWH 16129.032 Hz  
 FIDRES 0.246110 Hz  
 AQ 2.0316160 sec  
 RG 204.46  
 DW 31.000 usec  
 DE 6.50 usec  
 TE 297.4 K  
 CMBE2 145.000000  
 D1 2.0000000 sec  
 D2 0.03344808 sec  
 D12 0.00002000 sec  
 TD0 1

==== CHANNEL f1 =====  
 SF01 100.6459641 MHz  
 NUC1 13C  
 P1 10.62 usec  
 P13 2000.00 usec  
 PLW0 0 W  
 PLW1 54.0000000 W  
 SENAM[5] Ctp50comp.4  
 SFOALS 0.500  
 SFOFFS 0 Hz  
 SWS 9.30539989 W  
 ===== CHANNEL f2 =====  
 SF02 400.2312000 MHz  
 NUC2 1H  
 CPDPRG2 waltz16  
 P3 12.75 usec  
 P4 25.50 usec  
 PCPD2 90.00 usec  
 PLW2 12.0000000 W  
 PLW3 0.24083000 W

F2 - Processing parameters  
 SI 32768  
 SF 100.6379135 MHz  
 WDW EM  
 SSB 0  
 LB 1.00 Hz  
 GB 0  
 FC 1.40

DEPT-135 NMR Spectrum of Compound 4a

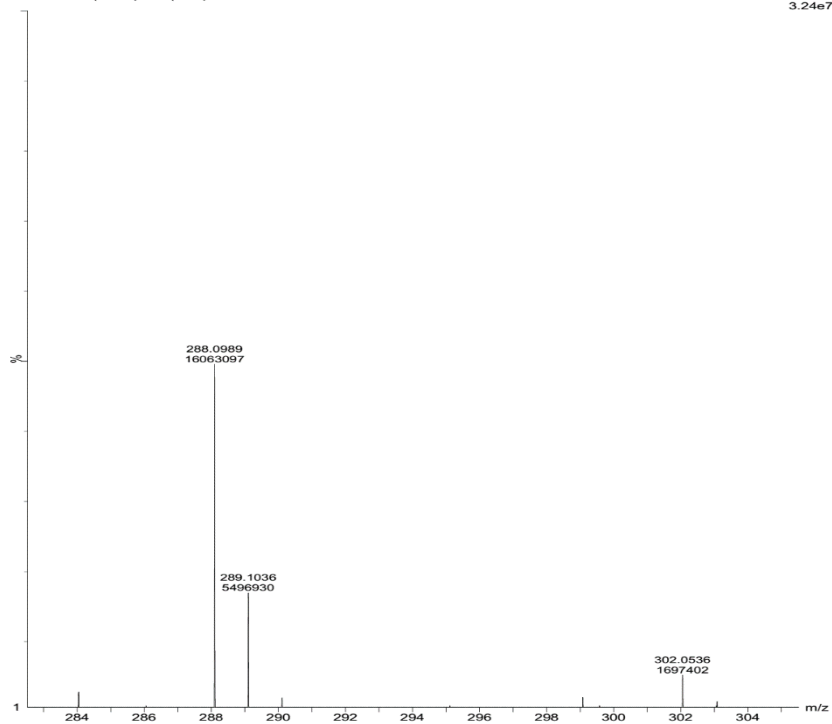

HRMS Spectrum of Compound **4a**

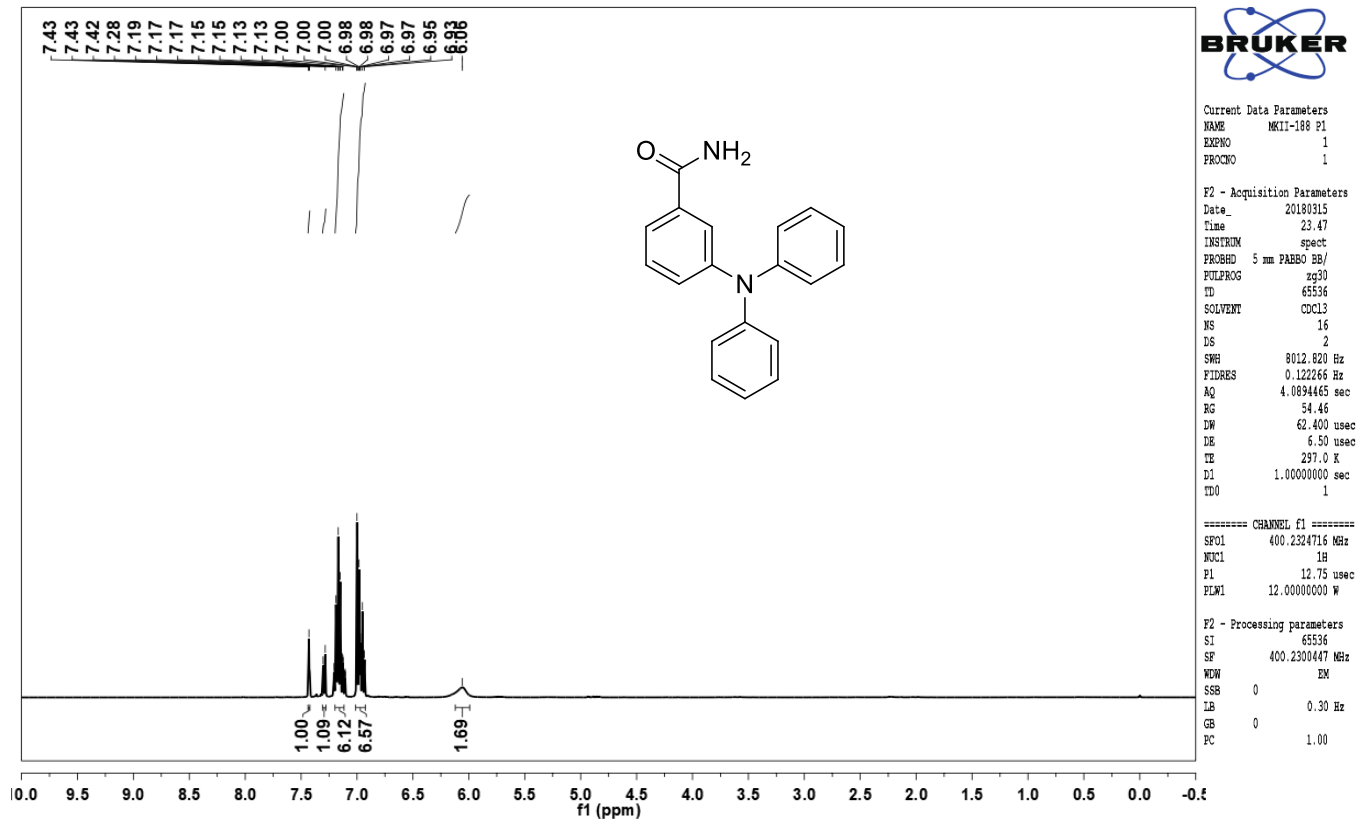

**1H NMR Spectrum of Compound 4b**

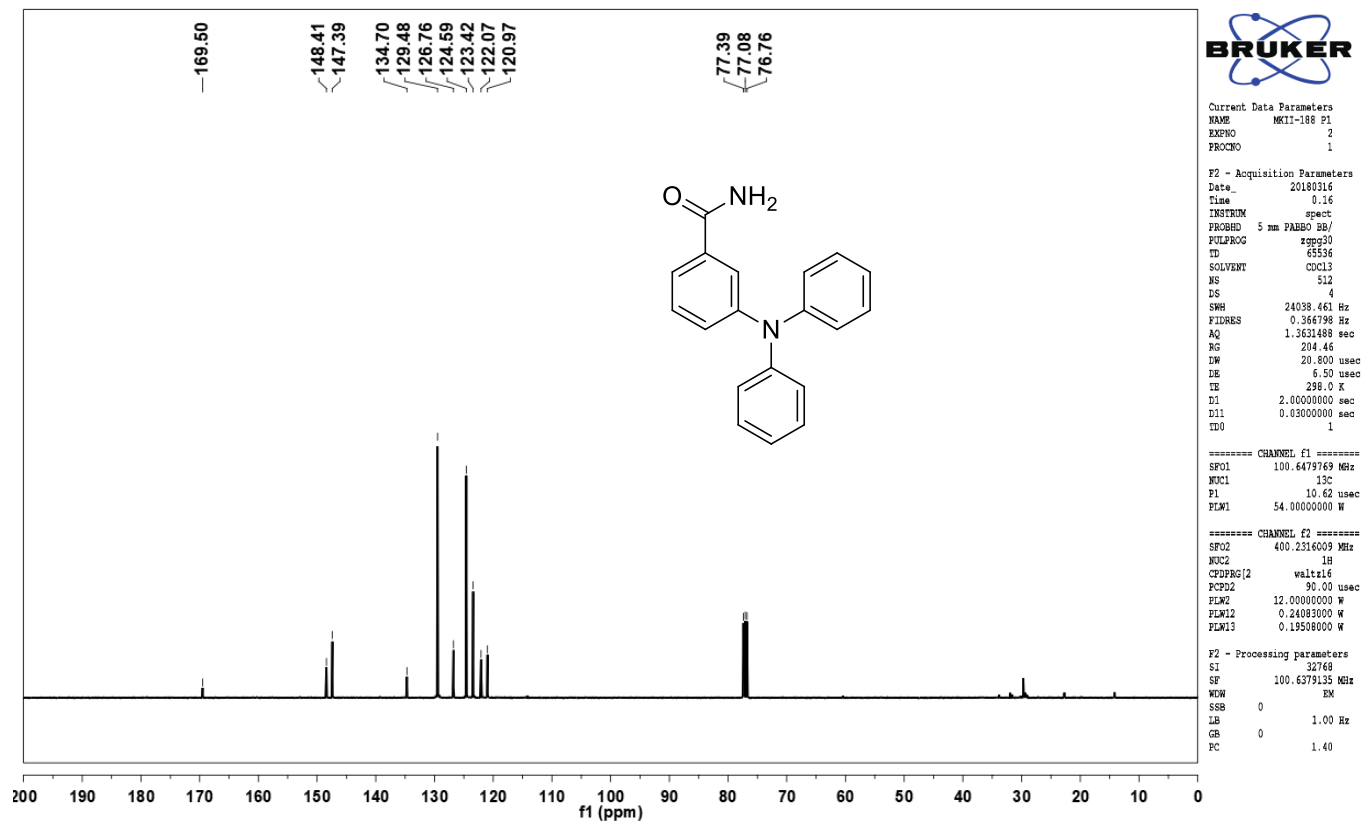

**13C NMR Spectrum of Compound 4b**

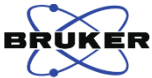

Current Data Parameters  
NAME MK11-188 P1  
EXPO 3  
PROCNO 1

F2 - Acquisition Parameters  
Date 20180316  
Time 0.34  
INSTRUM spect  
PROBHD 5 mm PABBO BB/  
PULPROG zgpg30  
TD 65536  
SOLVENT CDCl3  
NS 256  
DS 4  
SWH 16129.032 Hz  
FIDRES 0.246110 Hz  
AQ 2.0316160 sec  
RG 204.46  
DW 31.000 usec  
DE 6.50 usec  
TE 297.5 K  
CNS2 145.0000000  
D1 2.0000000 sec  
D2 0.00344828 sec  
D12 0.00002000 sec  
TD0 1

===== CHANNEL f1 =====  
SF01 100.6459641 MHz  
NUC1 13C  
P1 10.62 usec  
P13 2000.00 usec  
PLM0 0 W  
PLM1 54.00000000 W  
SPNAM[5] Crp60comp.4  
SFOA15 0.500  
SFOF55 0 Hz  
SEMS 9.30539989 W

===== CHANNEL f2 =====  
SF02 400.2312800 MHz  
NUC2 1H  
CPDPRG2 waltz16  
P3 12.75 usec  
P4 25.50 usec  
PCPD2 50.00 usec  
PLM2 12.00000000 W  
PLM12 0.24083000 W

F2 - Processing parameters  
S1 32768  
SF 100.6379135 MHz  
WDW EM  
SSB 0  
LB 1.00 Hz  
GB 0  
FC 1.40

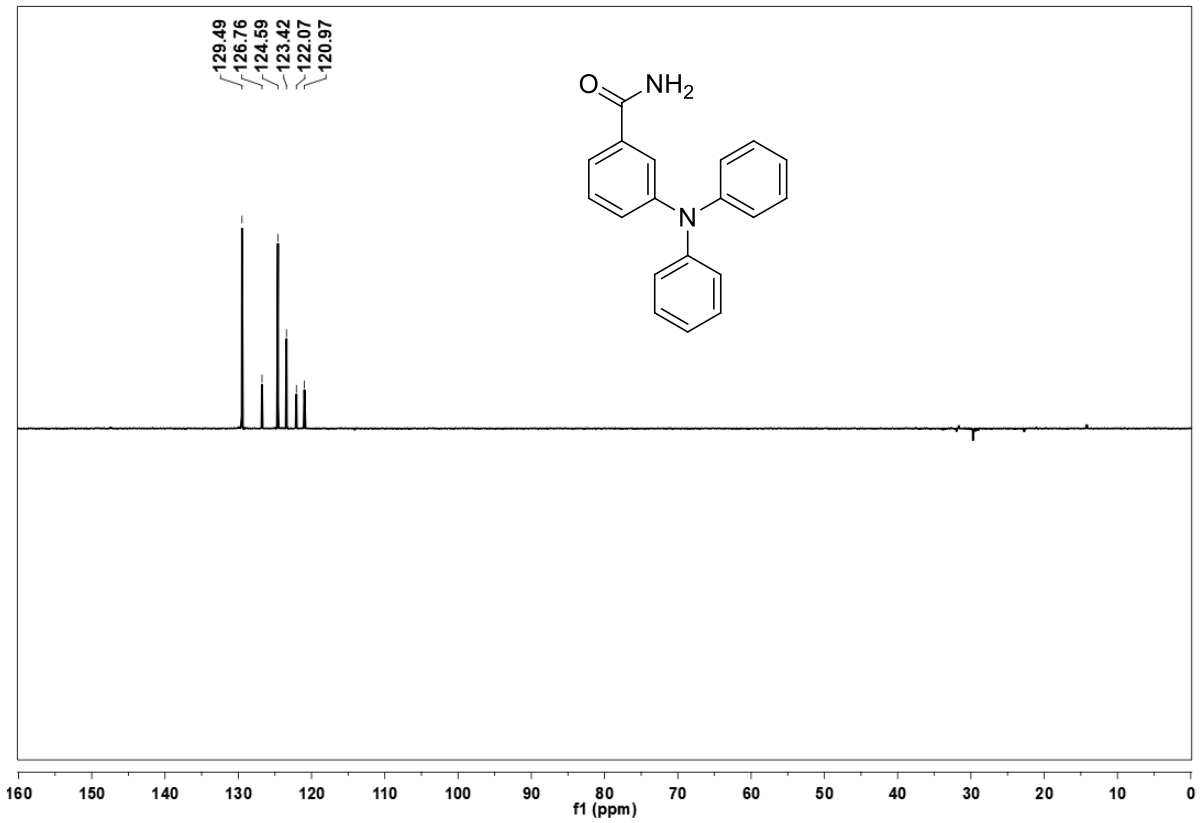

DEPT-135 NMR Spectrum of Compound 4b

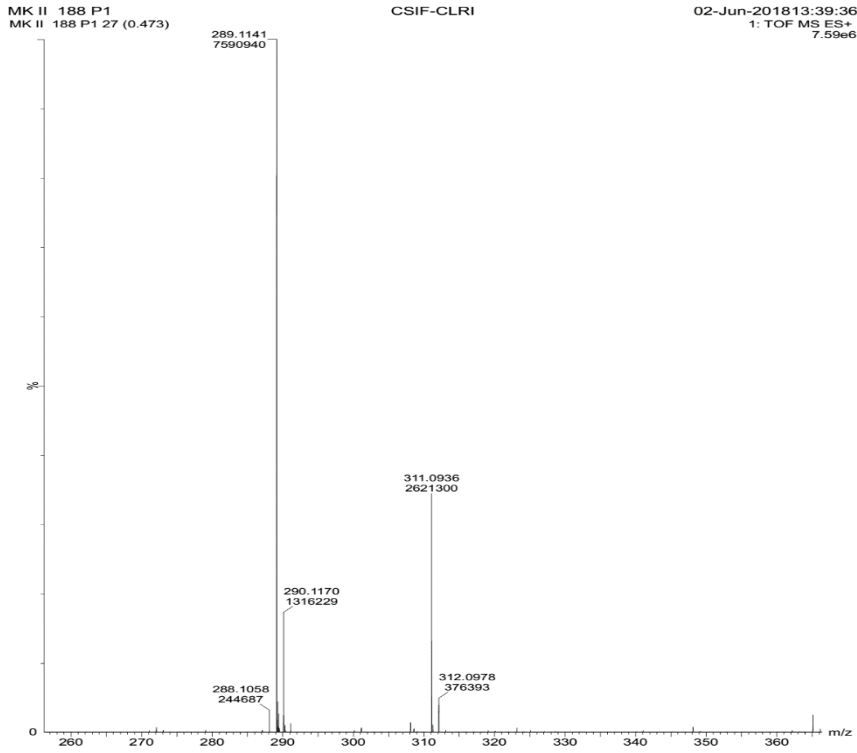

HRMS Spectrum of Compound 4b

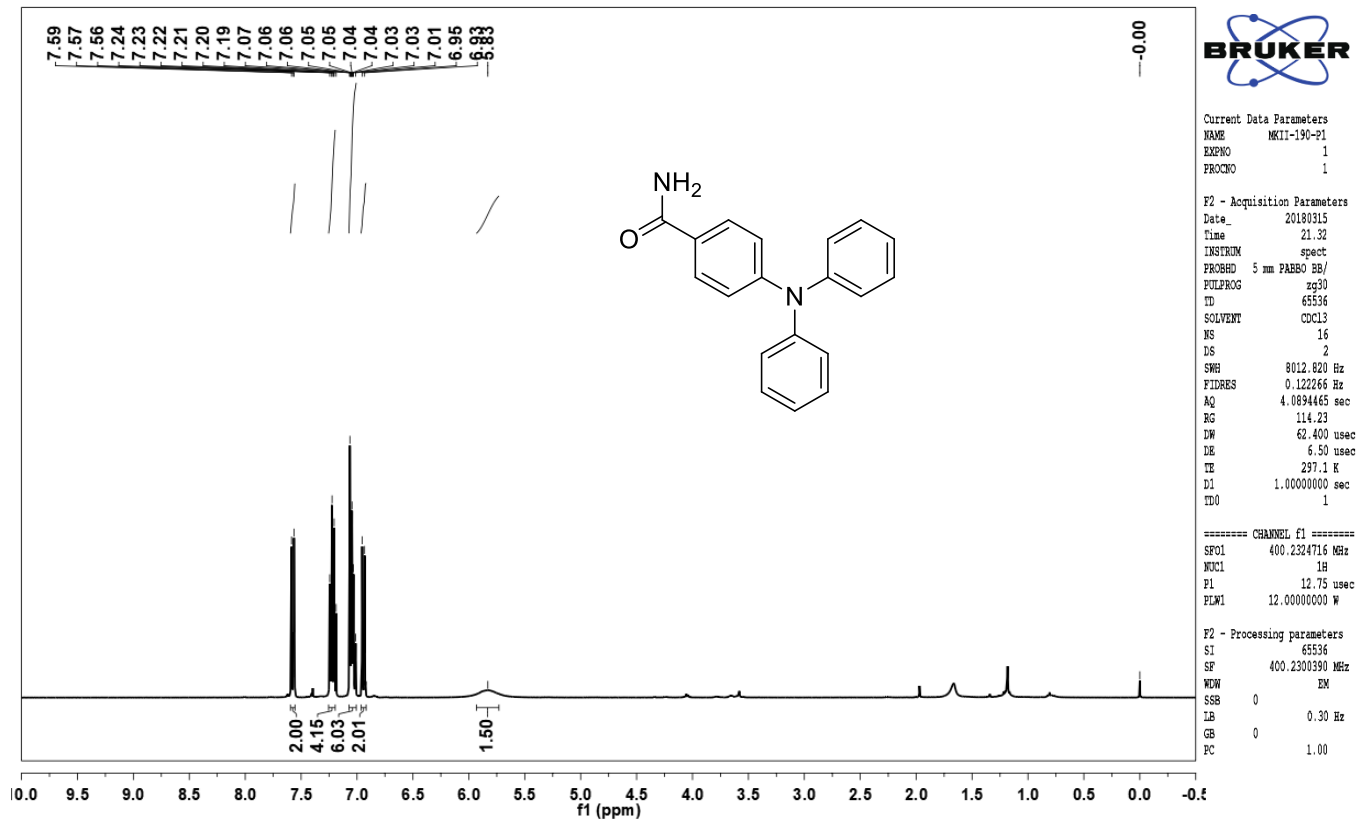

**<sup>1</sup>H NMR Spectrum of Compound 4c**

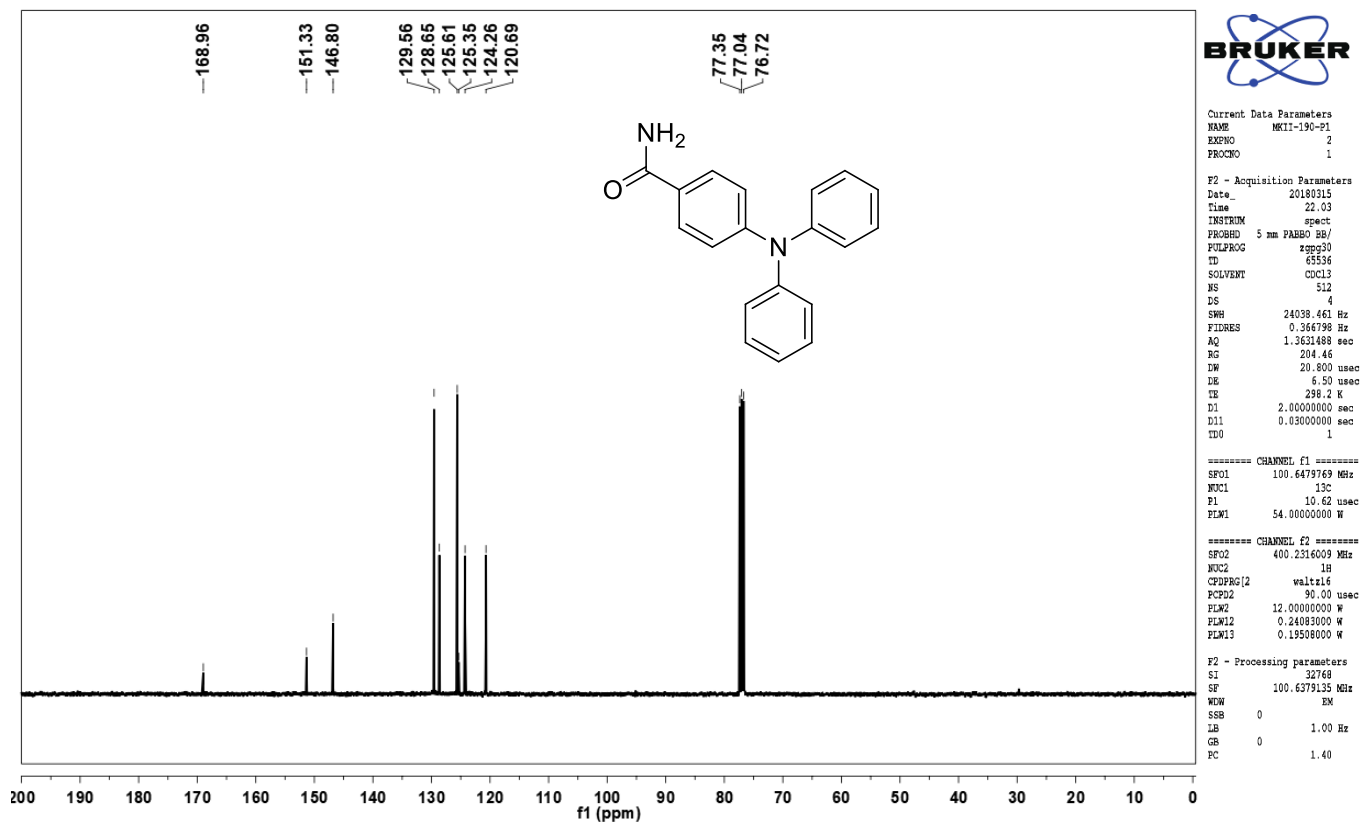

**<sup>13</sup>C NMR Spectrum of Compound 4c**

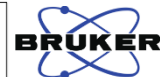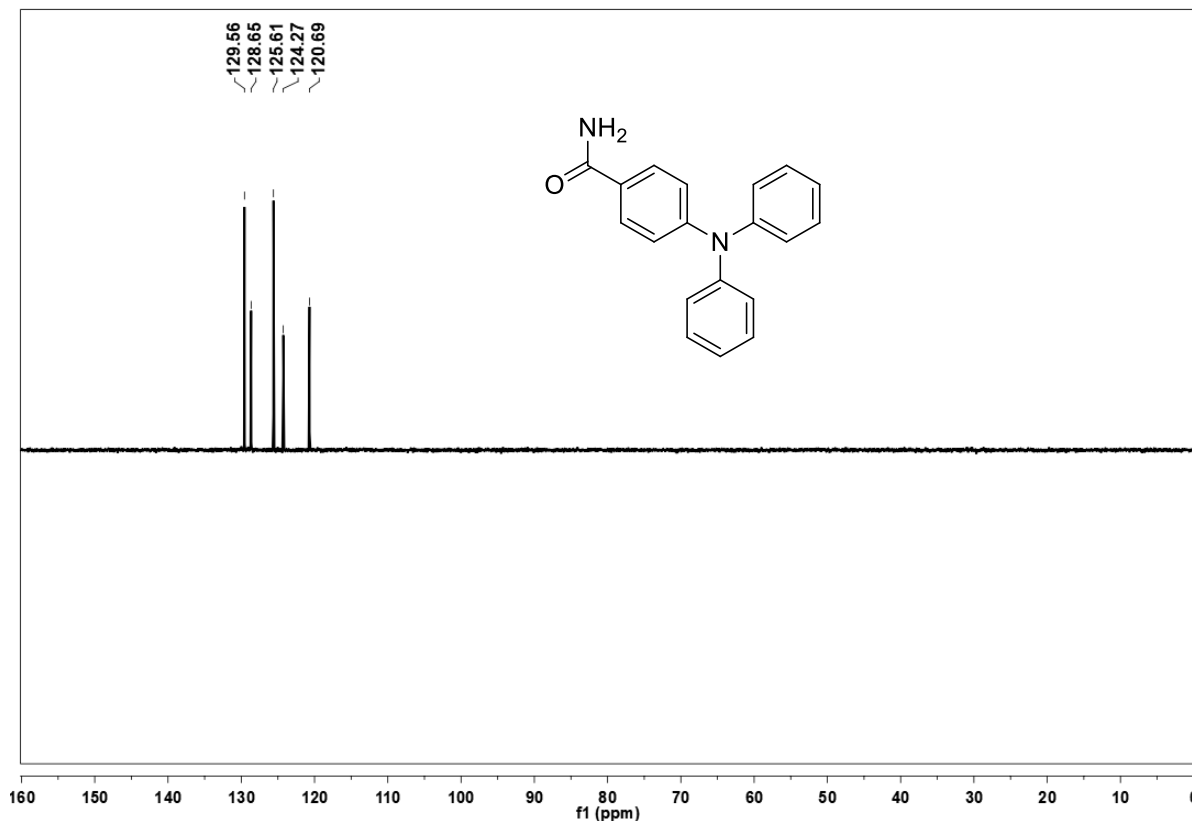

DEPT-135 NMR Spectrum of Compound **4c**

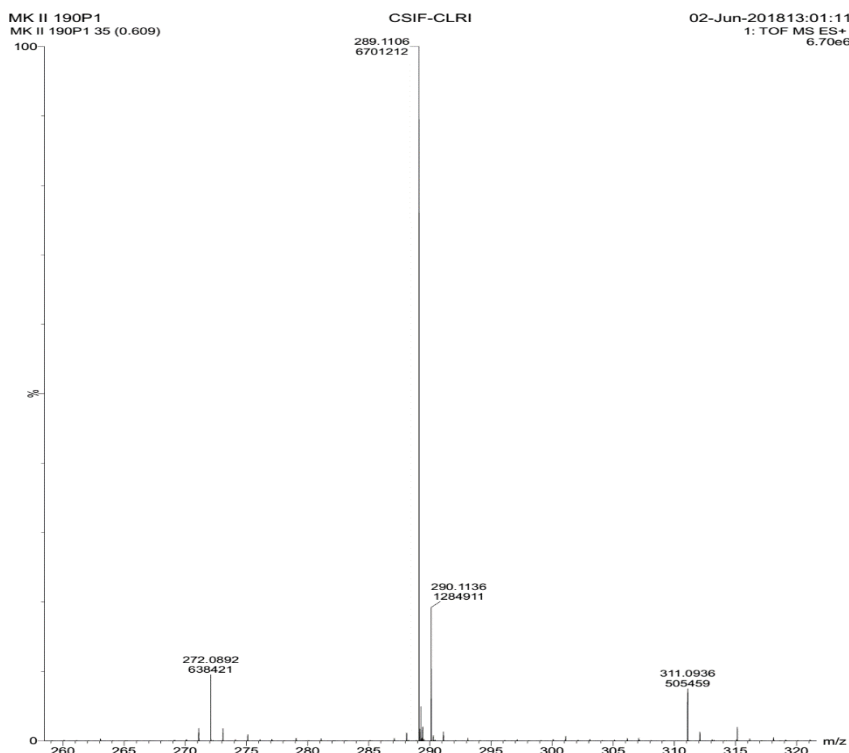

HRMS Spectrum of Compound **4c**



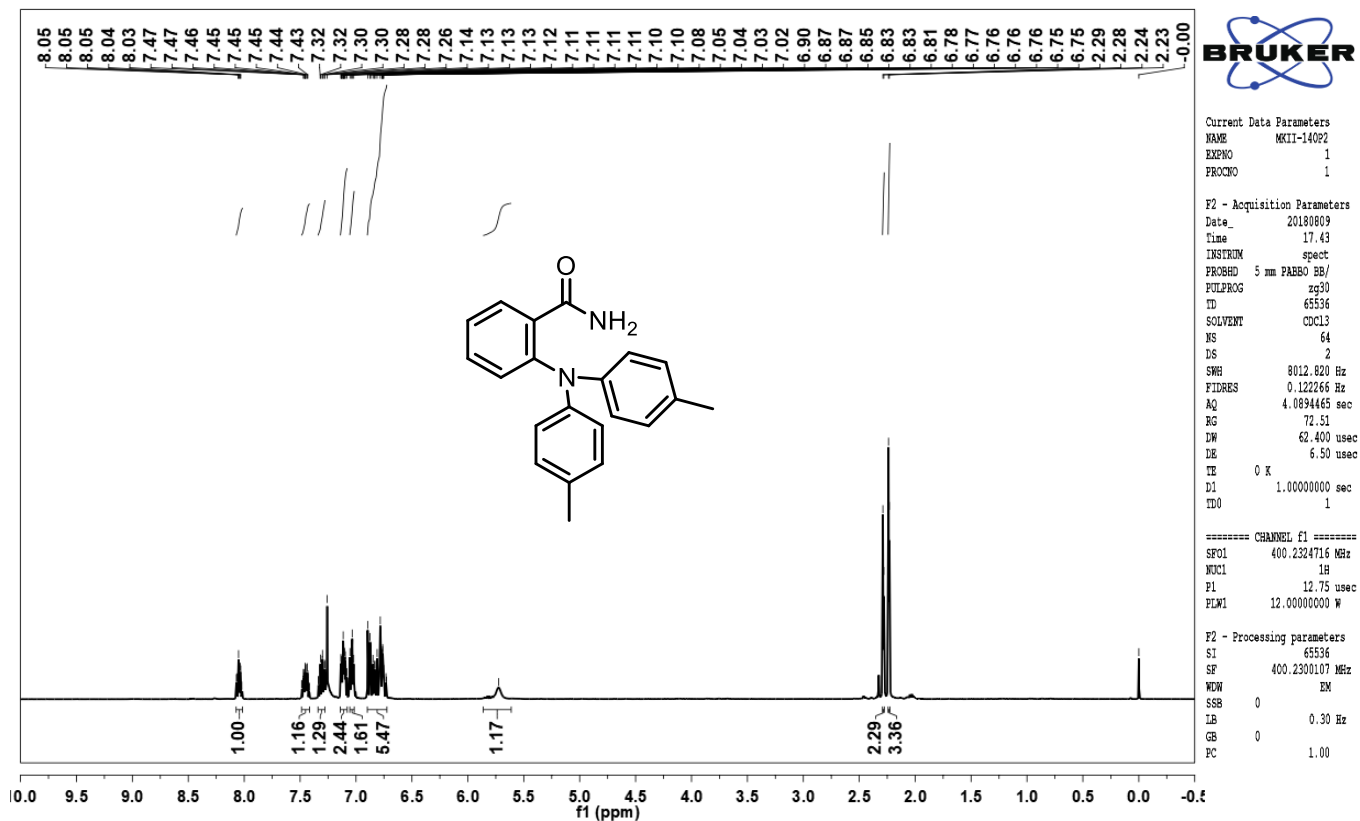

**<sup>1</sup>H NMR Spectrum of Compound 4d**

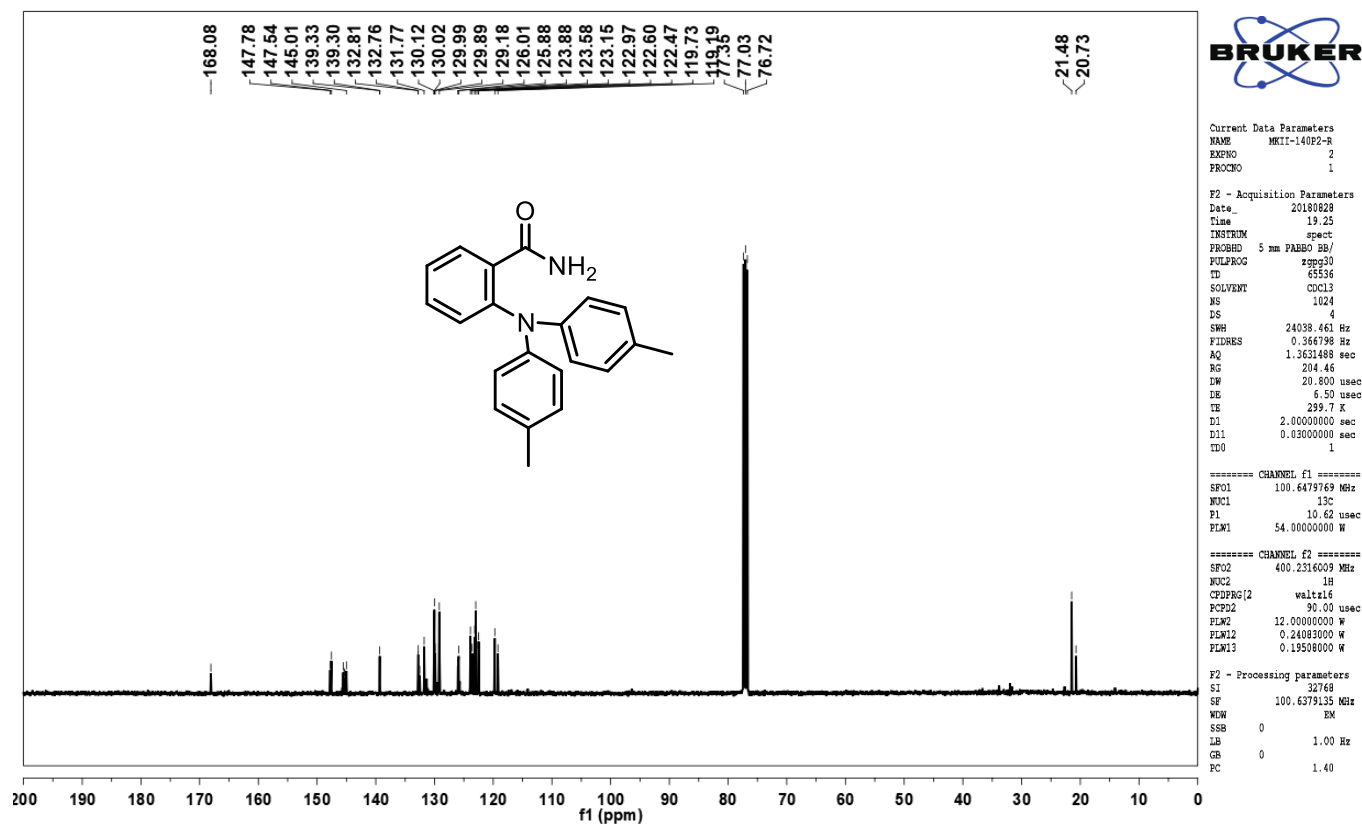

**<sup>13</sup>C NMR Spectrum of Compound 4d**

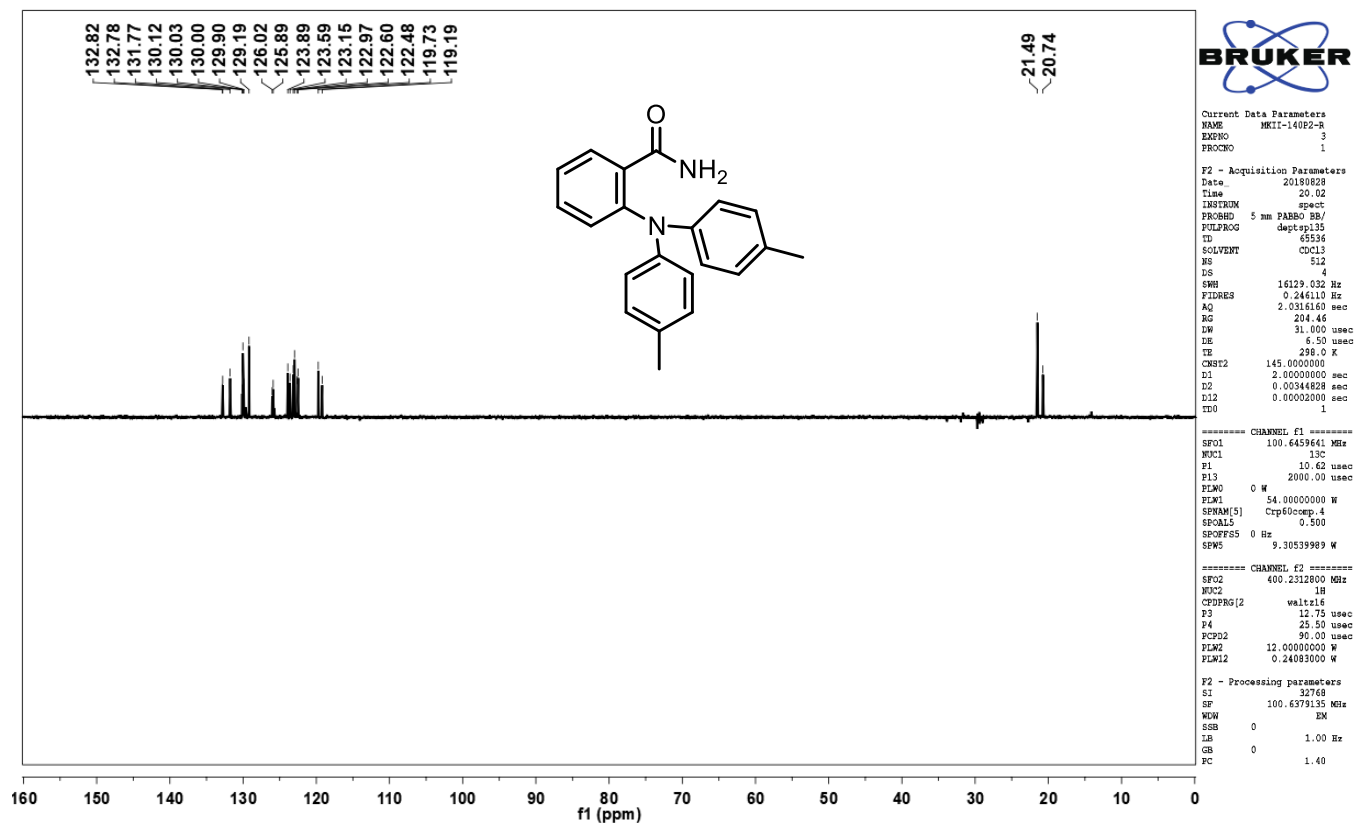

DEPT-135 NMR Spectrum of Compound 4d

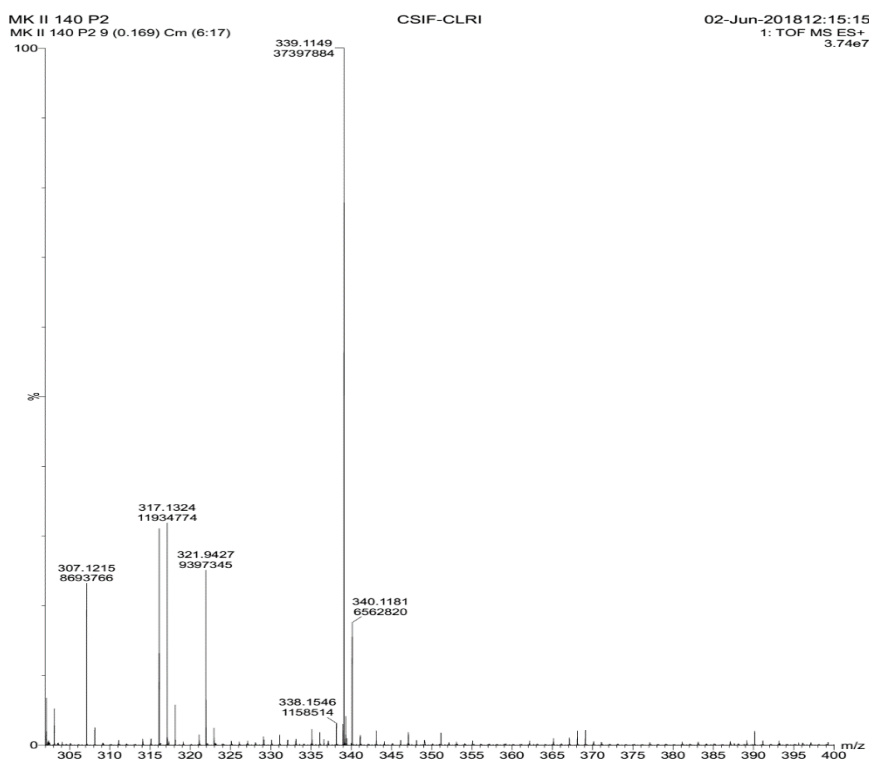

HRMS Spectrum of Compound 4d

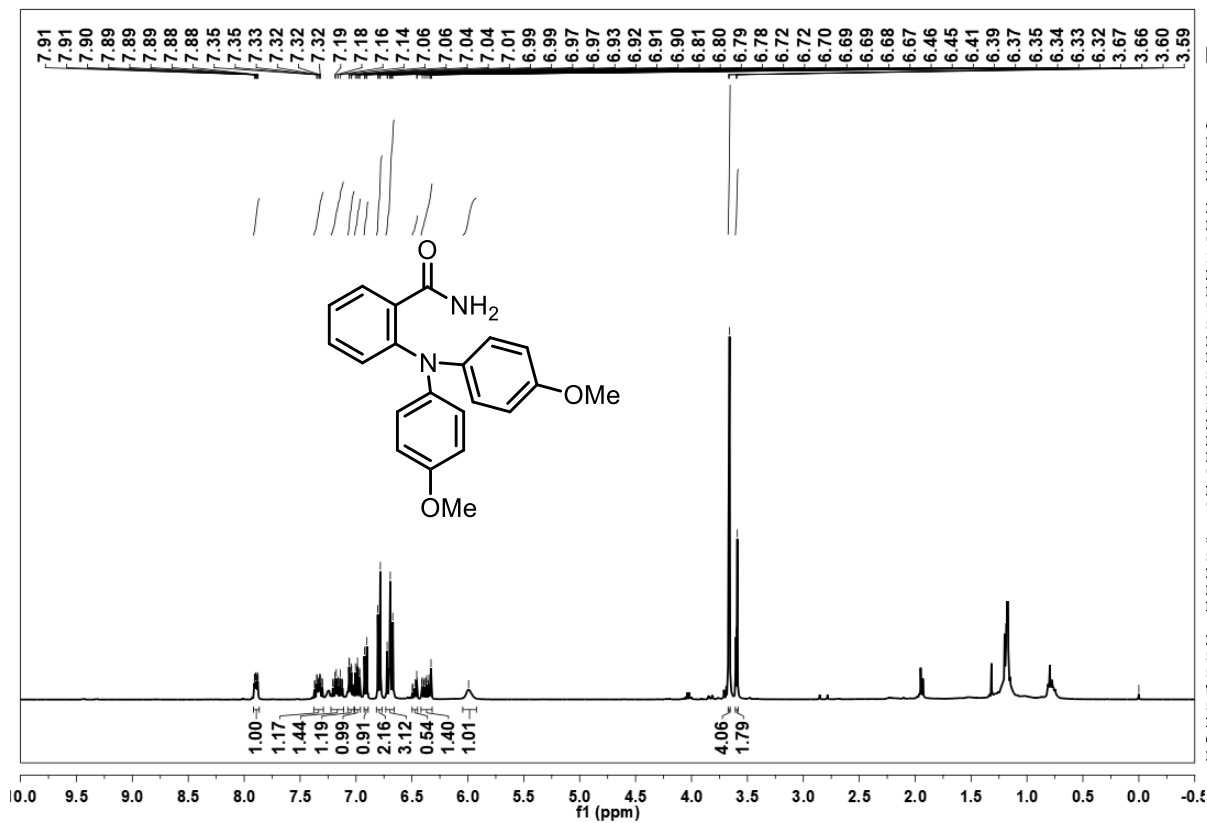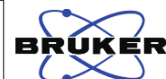

Current Data Parameters  
 NAME MK11-152-p2  
 EXNO 1  
 PROCNO 1

F2 - Acquisition Parameters  
 Date\_ 20180124  
 Time 17.36  
 INSTRUM spect  
 PROBD 5 mm PABBO BB/  
 PULPROG zg30  
 TD 65536  
 SOLVENT CDCl3  
 NS 16  
 DS 2  
 SWH 8012.820 Hz  
 FIDRES 0.122266 Hz  
 AQ 4.0894465 sec  
 RG 31.36  
 DW 62.400 usec  
 DE 6.50 usec  
 TE 296.7 K  
 D1 1.0000000 sec  
 TDO 1

===== CHANNEL f1 =====  
 SFO1 400.2324716 MHz  
 NUCL1 1H  
 P1 12.75 usec  
 PLW1 12.0000000 W

F2 - Processing parameters  
 SI 65536  
 SF 400.2300428 MHz  
 WDW EM  
 SSB 0  
 LB 0.30 Hz  
 GB 0  
 PC 1.00

**1H NMR Spectrum of Compound 4e**

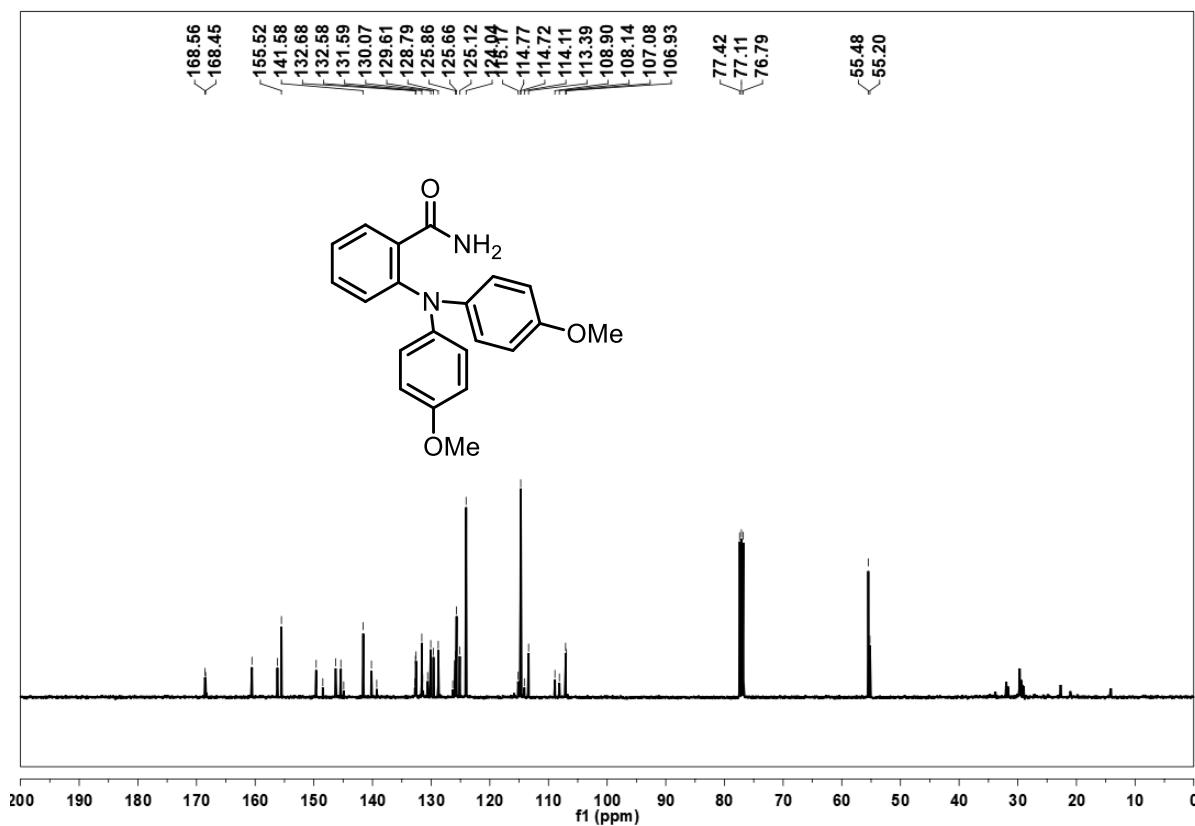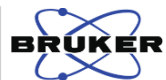

Current Data Parameters  
 NAME MK11-152-p2  
 EXNO 2  
 PROCNO 1

F2 - Acquisition Parameters  
 Date\_ 20180124  
 Time 18.06  
 INSTRUM spect  
 PROBD 5 mm PABBO BB/  
 PULPROG zgpg30  
 TD 65536  
 SOLVENT CDCl3  
 NS 512  
 DS 4  
 SWH 24038.461 Hz  
 FIDRES 0.366798 Hz  
 AQ 1.3631488 sec  
 RG 204.46  
 DW 20.800 usec  
 DE 6.50 usec  
 TE 297.7 K  
 D1 2.0000000 sec  
 D11 0.0300000 sec  
 TDO 1

===== CHANNEL f1 =====  
 SFO1 100.6273769 MHz  
 NUCL1 13C  
 P1 10.62 usec  
 PLW1 54.0000000 W

===== CHANNEL f2 =====  
 SFO2 400.2316009 MHz  
 NUCL2 1H  
 CPDPRG2 waltz16  
 PCPD2 90.00 usec  
 PLW2 12.0000000 W  
 PLW12 0.24083000 W  
 PLW13 0.19508000 W

F2 - Processing parameters  
 SI 32768  
 SF 100.6379135 MHz  
 WDW EM  
 SSB 0  
 LB 1.00 Hz  
 GB 0  
 PC 1.40

**13C NMR Spectrum of Compound 4e**

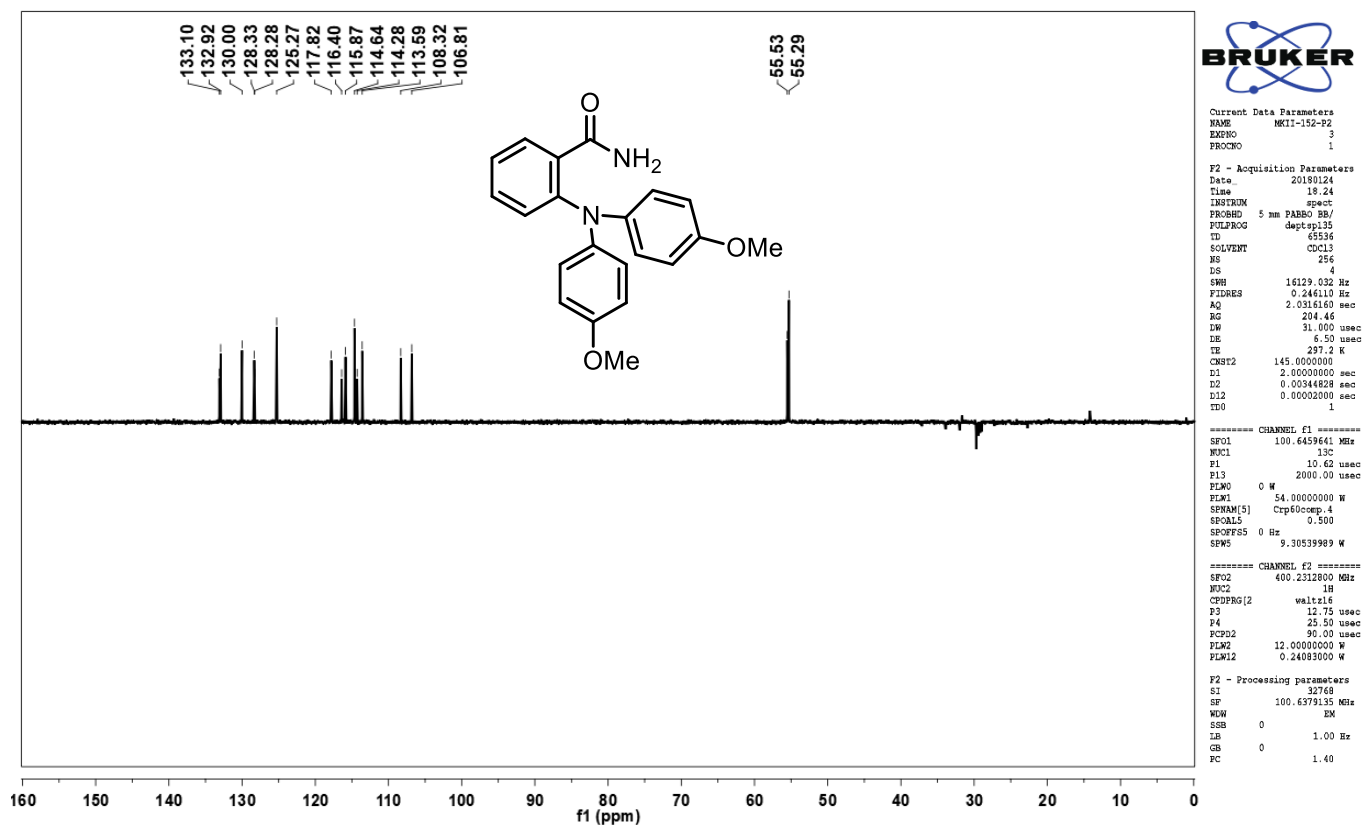

DEPT-135 NMR Spectrum of Compound 4e

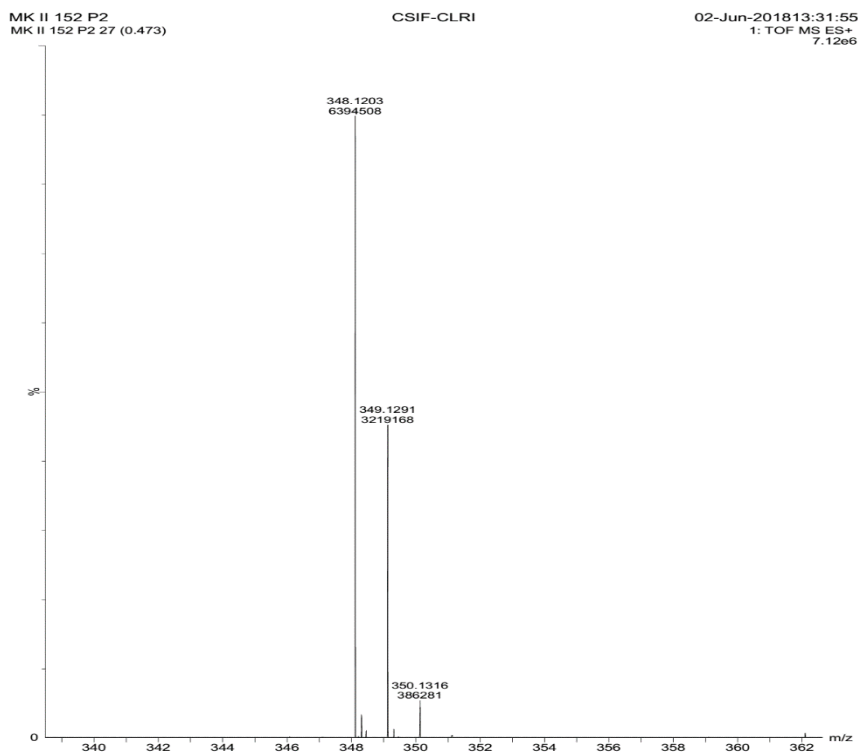

HRMS Spectrum of Compound 4e

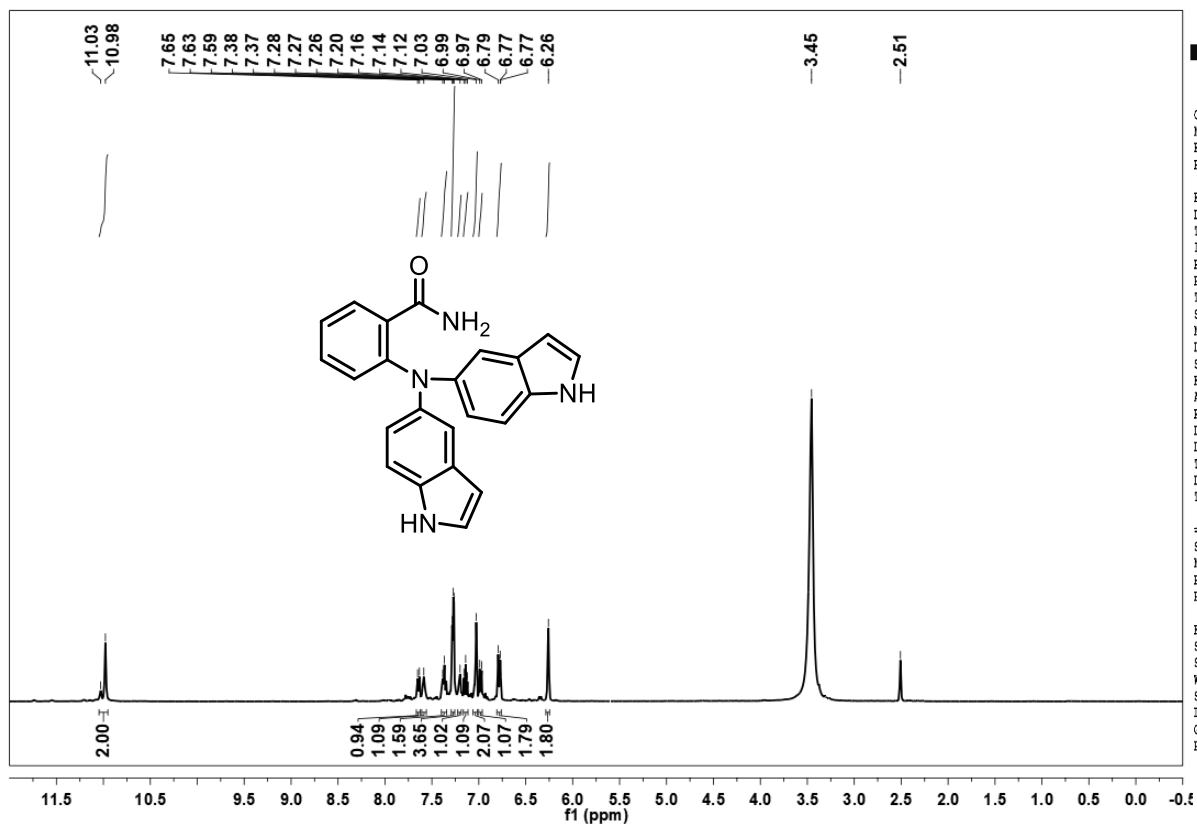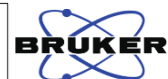

Current Data Parameters  
 NAME MKII-150-P2  
 EXEWO 1  
 PROCNO 1

F2 - Acquisition Parameters  
 Date\_ 20180101  
 Time 19.19  
 INSTRUM spect  
 PROBHD 5 mm PABBO BB/  
 PULPROG zg30  
 TD 65536  
 SOLVENT DMSO  
 NS 16  
 DS 2  
 SWH 8012.820 Hz  
 FIDRES 0.122266 Hz  
 AQ 4.0894465 sec  
 RG 31.36  
 DW 62.400 usec  
 DE 6.50 usec  
 TE 295.8 K  
 D1 1.0000000 sec  
 TDO 1

===== CHANNEL f1 =====  
 SFO1 400.2324716 MHz  
 NUC1 1H  
 P1 12.75 usec  
 PLW1 12.0000000 W

F2 - Processing parameters  
 SI 65536  
 SF 400.2300000 MHz  
 MW EM  
 SSB 0  
 LB 0.30 Hz  
 GB 0  
 PC 1.00

<sup>1</sup>H NMR Spectrum of Compound 4f

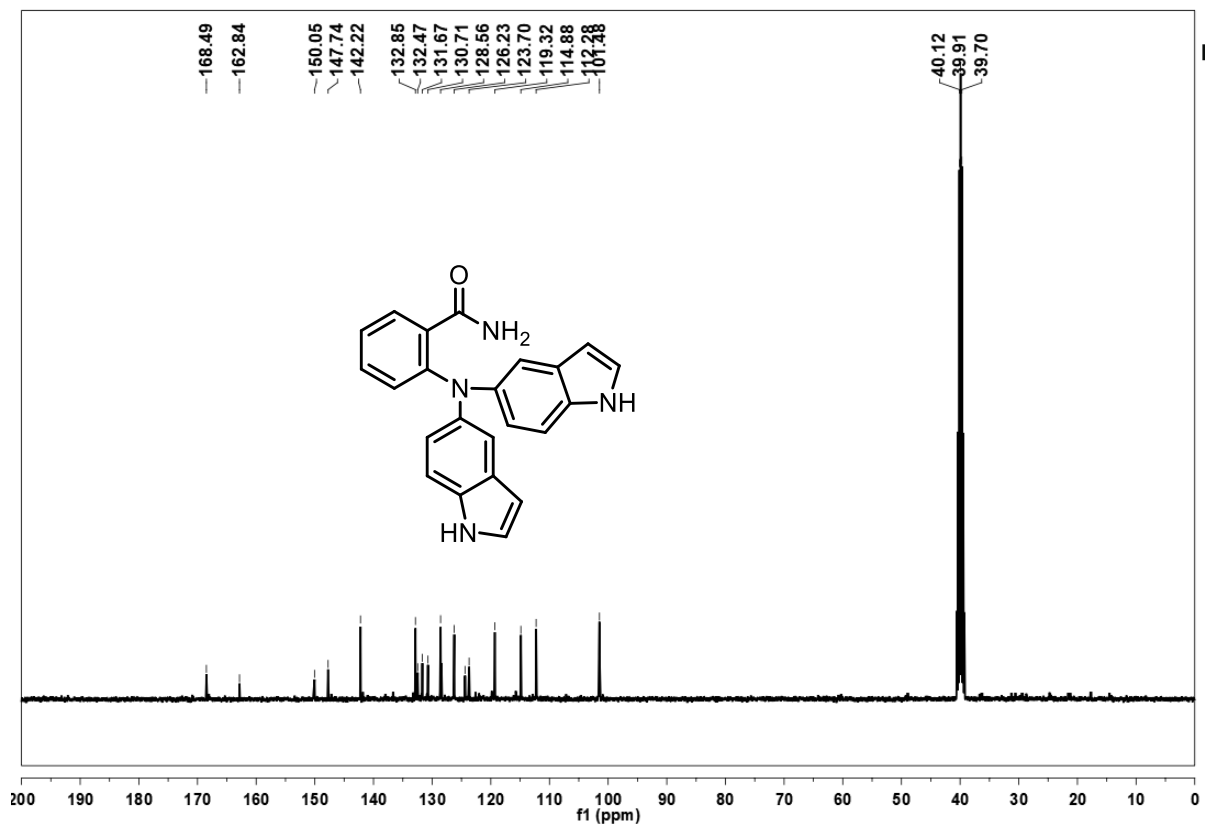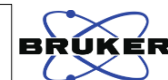

Current Data Parameters  
 NAME MKII-150-P2  
 EXEWO 2  
 PROCNO 1

F2 - Acquisition Parameters  
 Date\_ 20180101  
 Time 19.50  
 INSTRUM spect  
 PROBHD 5 mm PABBO BB/  
 PULPROG zgpg30  
 TD 65536  
 SOLVENT DMSO  
 NS 512  
 DS 4  
 SWH 24038.461 Hz  
 FIDRES 0.366798 Hz  
 AQ 1.3631488 sec  
 RG 204.46  
 DW 20.800 usec  
 DE 6.50 usec  
 TE 296.8 K  
 D1 2.0000000 sec  
 D11 0.0300000 sec  
 TDO 1

===== CHANNEL f1 =====  
 SFO1 100.6479769 MHz  
 NUC1 13C  
 P1 10.62 usec  
 PLW1 54.0000000 W

===== CHANNEL f2 =====  
 SFO2 400.2316009 MHz  
 NUC2 1H  
 CPDPRG2 waltz16  
 PCPD2 90.00 usec  
 PLW2 12.0000000 W  
 PLW12 0.24083000 W  
 PLW13 0.19508000 W

F2 - Processing parameters  
 SI 32768  
 SF 100.6379135 MHz  
 MW EM  
 SSB 0  
 LB 1.00 Hz  
 GB 0  
 PC 1.40

<sup>13</sup>C NMR Spectrum of Compound 4f

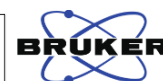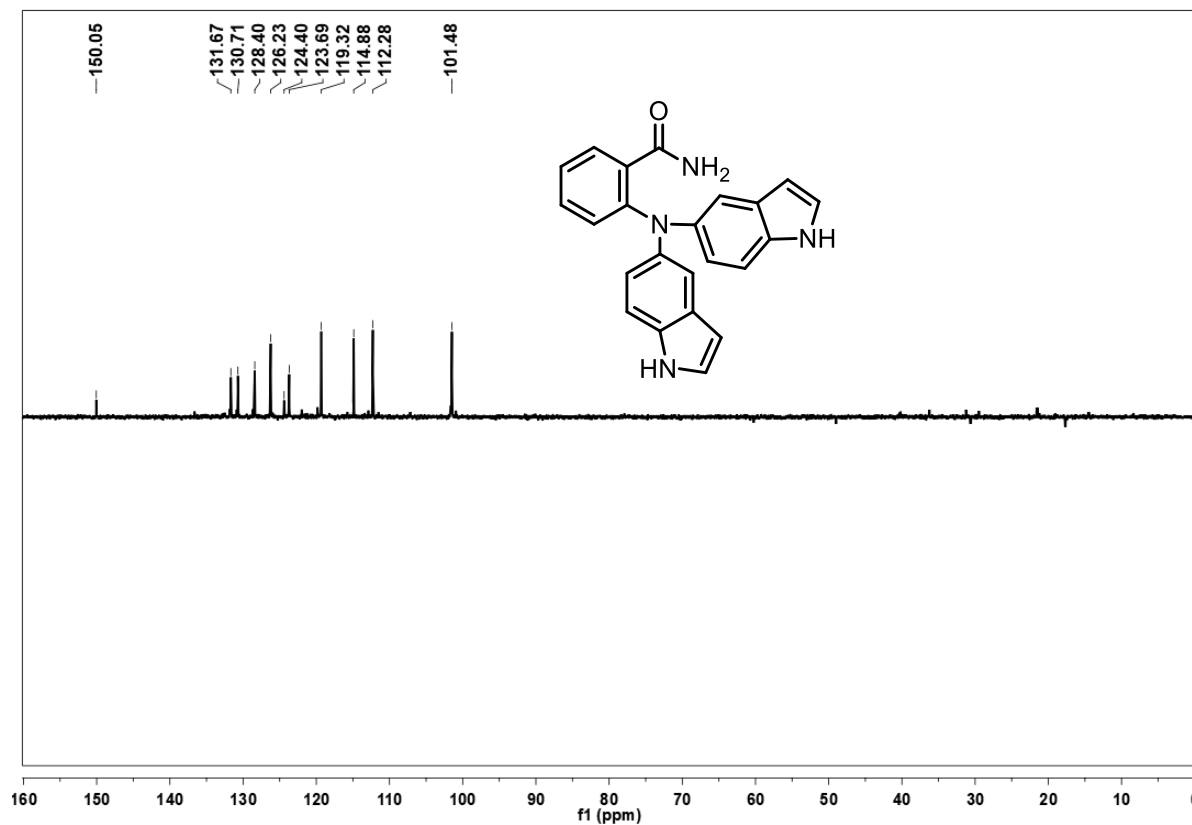

DEPT-135 NMR Spectrum of Compound 4f

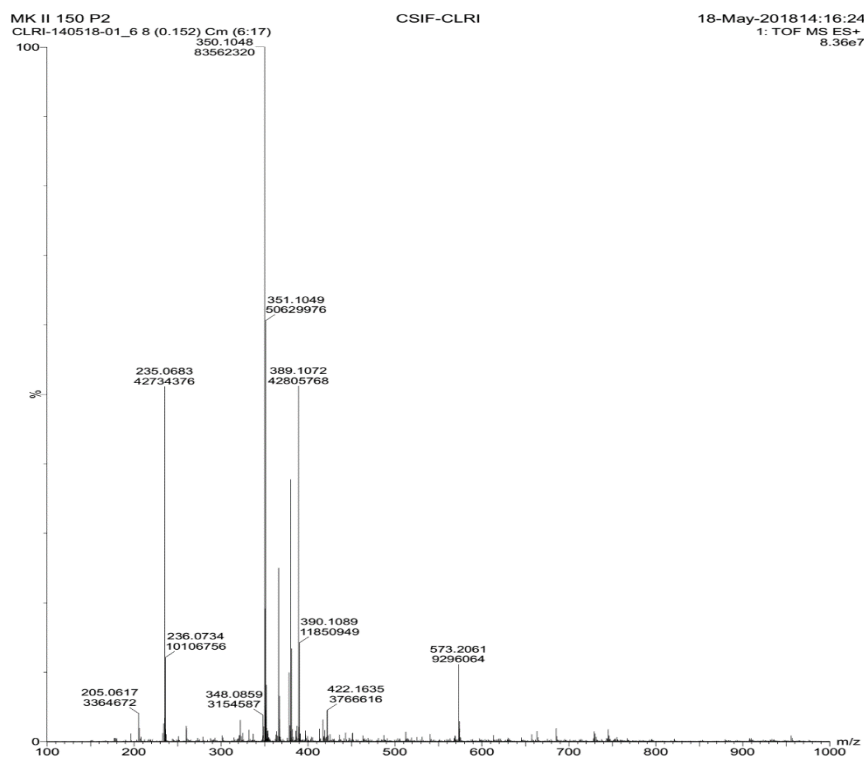

HRMS Spectrum of Compound 4f

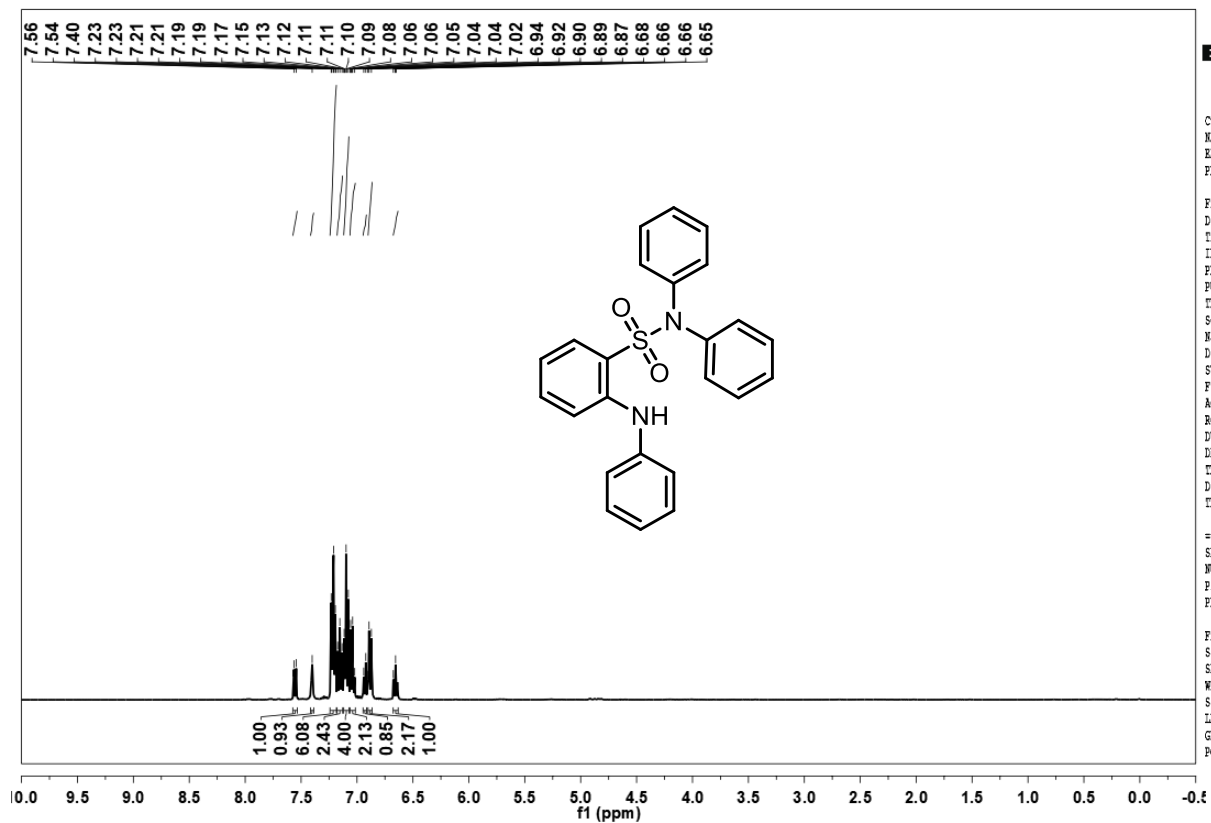

**<sup>1</sup>H NMR Spectrum of Compound 4g**

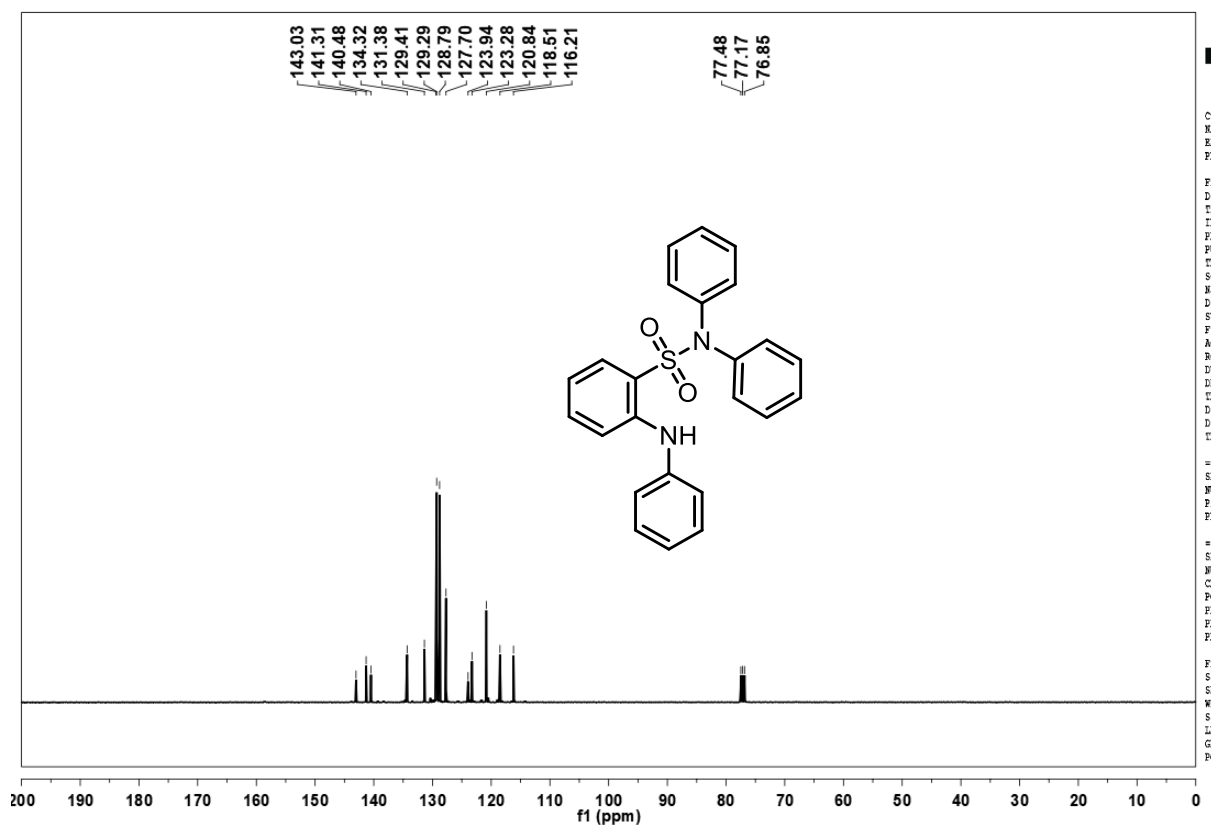

**<sup>13</sup>C NMR Spectrum of Compound 4g**

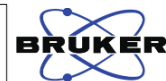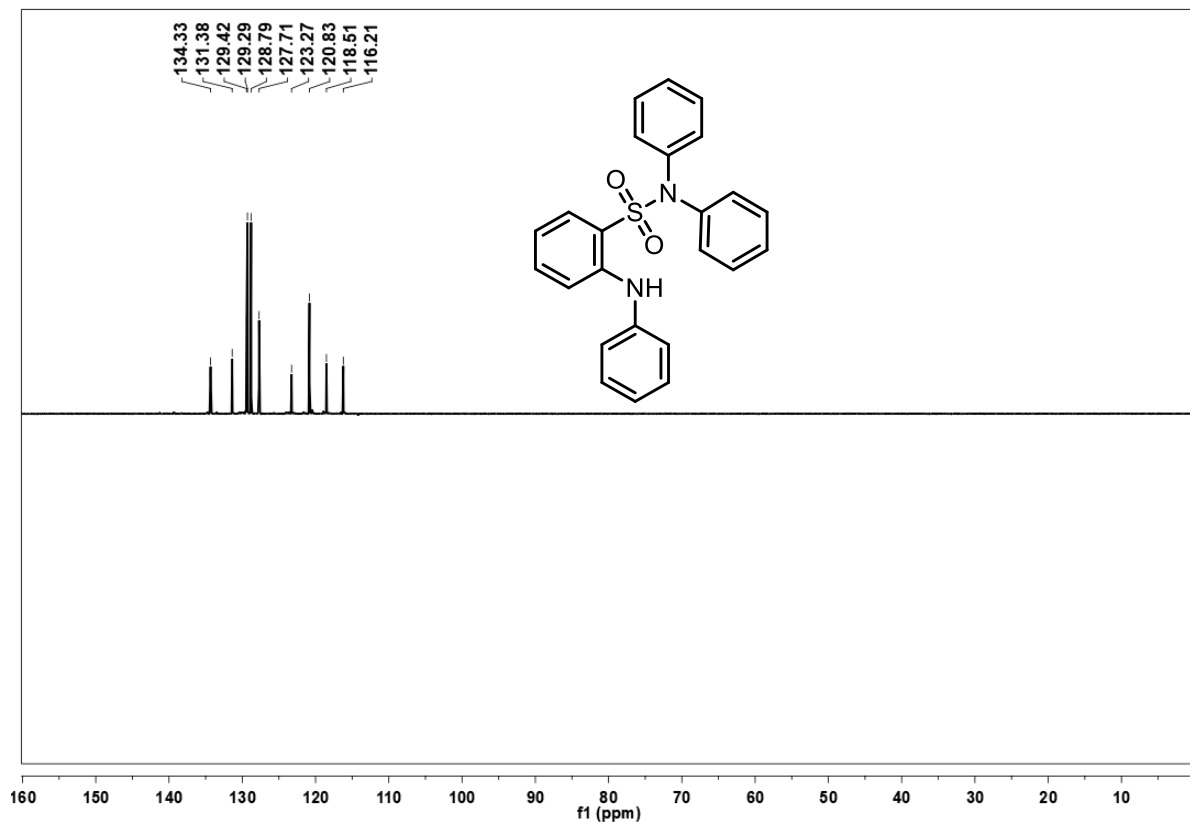

DEPT-135 NMR Spectrum of Compound **4g**

W:\Data\2018\April-2018\MKII-174p1

04-05-2018 12:49:47

MKII-174p1 #90-102 RT: 1.54-1.70 AV: 13 NL: 5.28E7  
T: FTMS (1,1) + p ESI Full ms [100.00-1500.00]

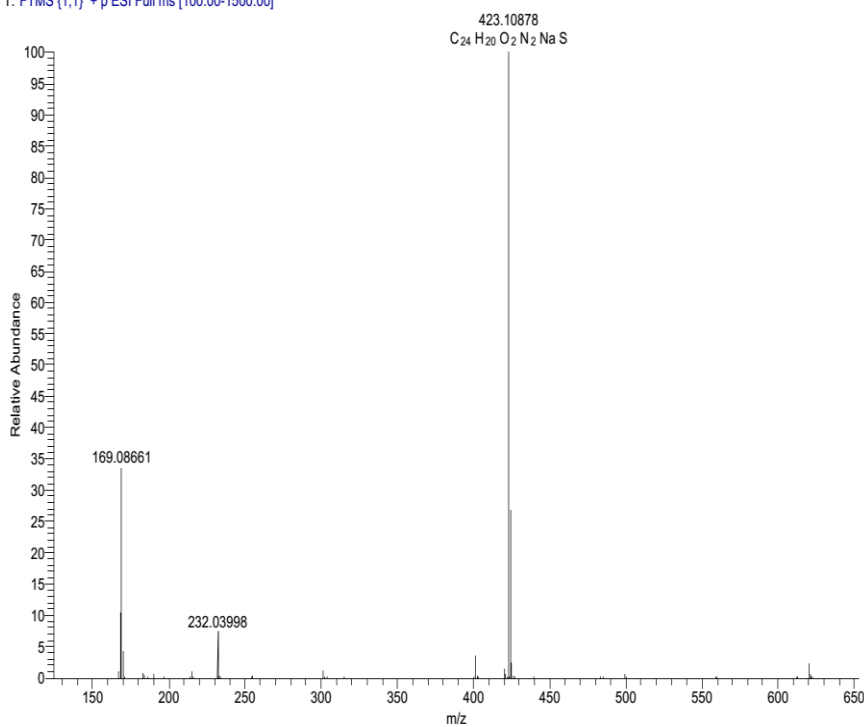

HRMS Spectrum of Compound **4g**



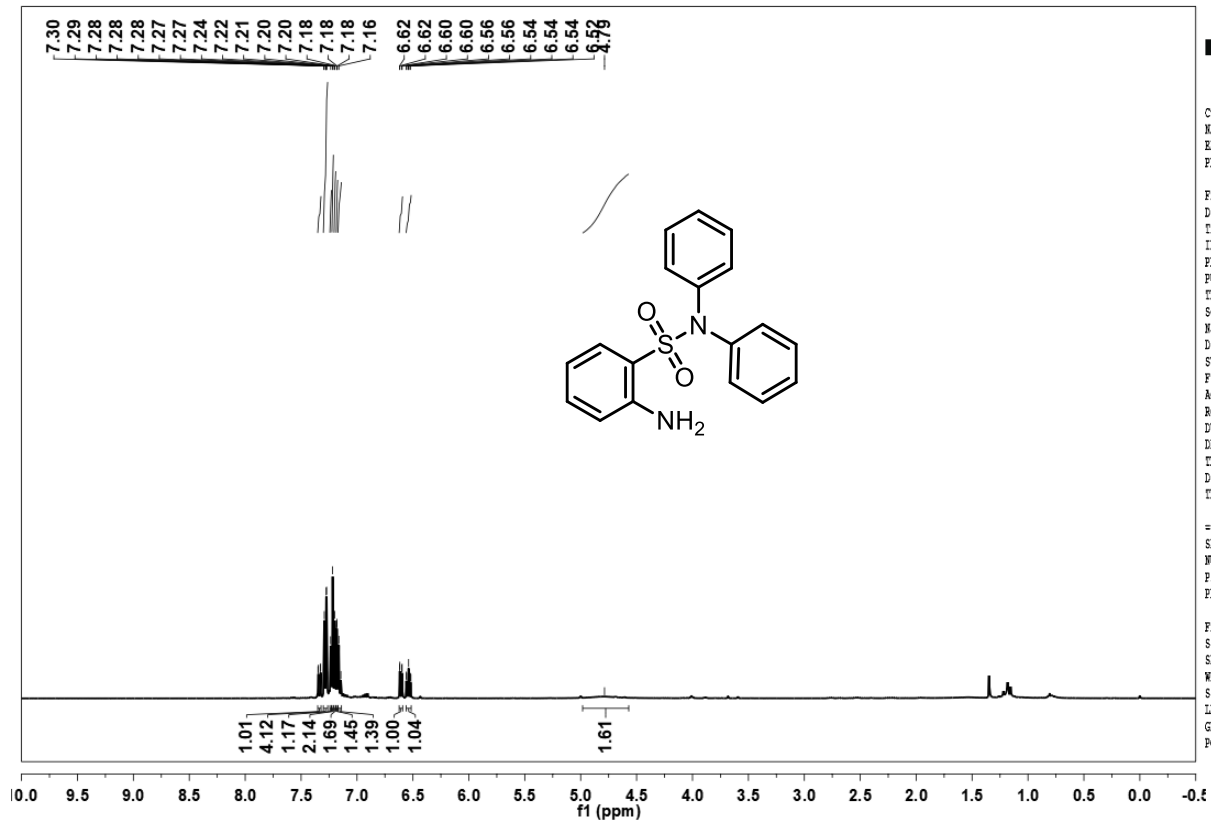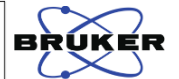

Current Data Parameters  
 NAME MKII-174P3  
 EXPNO 1  
 PROCNO 1

F2 - Acquisition Parameters  
 Date\_ 20180301  
 Time 18.17  
 INSTRUM spect  
 PROBHD 5 mm PABBO BB/  
 PULPROG zg30  
 TD 65536  
 SOLVENT CDCl3  
 NS 16  
 DS 2  
 SWH 8012.820 Hz  
 FIDRES 0.122266 Hz  
 AQ 4.089465 sec  
 RG 79.6  
 EW 62.400 usec  
 DE 6.50 usec  
 TE 296.2 K  
 D1 1.0000000 sec  
 TDO 1

===== CHANNEL f1 =====  
 SFO1 400.2324716 MHz  
 NUCL1 1H  
 P1 12.75 usec  
 PLW1 12.00000000 W

F2 - Processing parameters  
 SI 65536  
 SF 400.2300422 MHz  
 WDW EM  
 SSB 0  
 LB 0.30 Hz  
 GB 0  
 PC 1.00

**1H NMR Spectrum of Compound 4h**

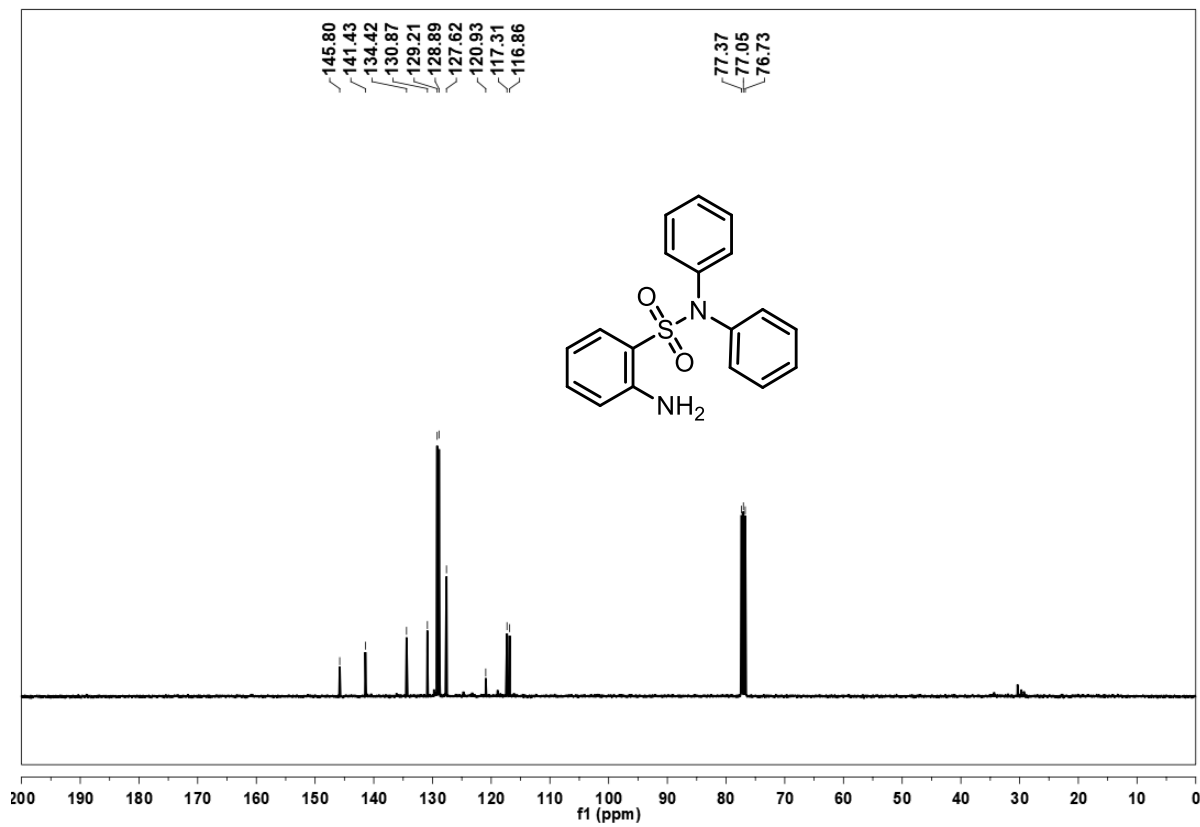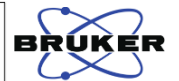

Current Data Parameters  
 NAME MKII-174P3  
 EXPNO 2  
 PROCNO 1

F2 - Acquisition Parameters  
 Date\_ 20180301  
 Time 18.48  
 INSTRUM spect  
 PROBHD 5 mm PABBO BB/  
 PULPROG zgpg30  
 TD 65536  
 SOLVENT CDCl3  
 NS 512  
 DS 4  
 SWH 24038.461 Hz  
 FIDRES 0.364798 Hz  
 AQ 1.3631488 sec  
 RG 204.46  
 EW 20.800 usec  
 DE 6.50 usec  
 TE 297.4 K  
 D1 2.0000000 sec  
 D11 0.03000000 sec  
 TDO 1

===== CHANNEL f1 =====  
 SFO1 100.6479769 MHz  
 NUCL1 13C  
 P1 10.62 usec  
 PLW1 54.00000000 W

===== CHANNEL f2 =====  
 SFO2 400.2316009 MHz  
 NUCL2 1H  
 CPDPRG2 waltz16  
 PCPD2 90.00 usec  
 PLW2 12.00000000 W  
 PLW12 0.24083000 W  
 PLW13 0.19598000 W

F2 - Processing parameters  
 SI 32768  
 SF 100.6379135 MHz  
 WDW EM  
 SSB 0  
 LB 1.00 Hz  
 GB 0  
 PC 1.40

**13C NMR Spectrum of Compound 4h**

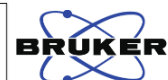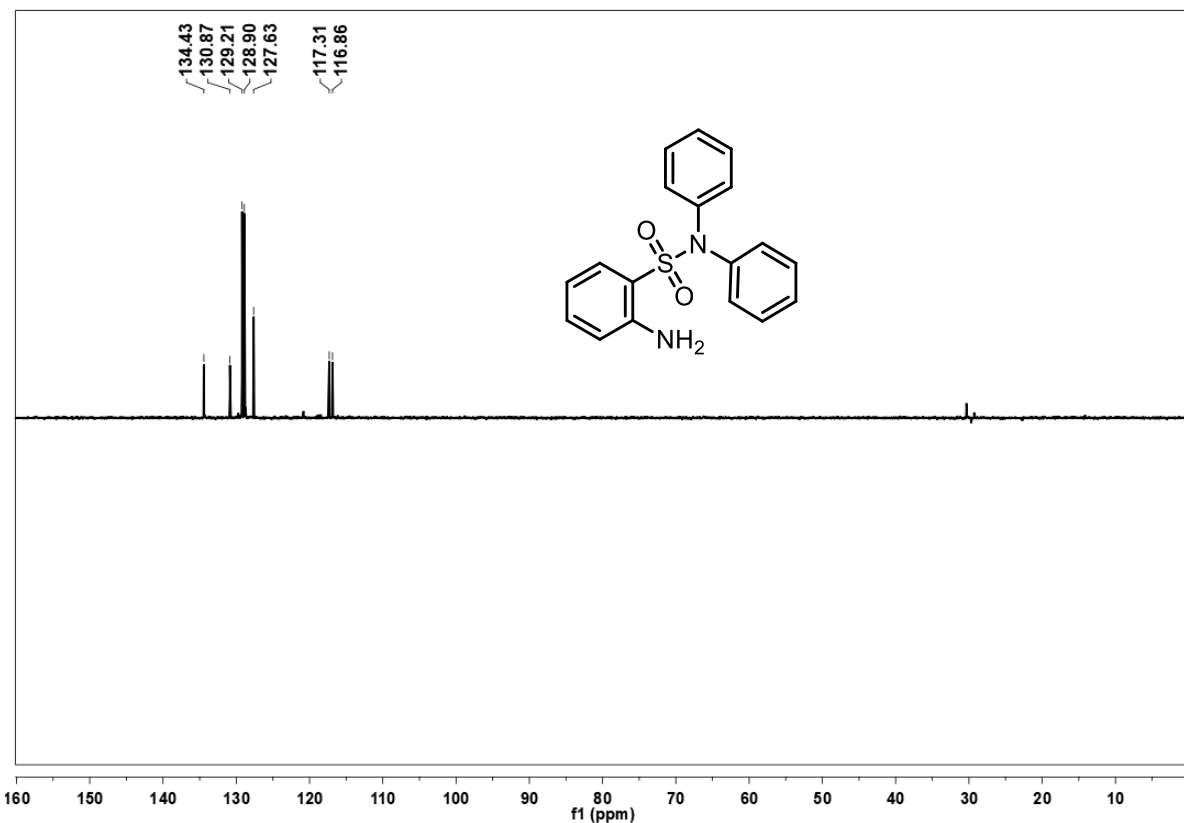

DEPT-135 NMR Spectrum of Compound **4h**

W:\Data\2018\April-2018\MKII-174-P3

04-05-2018 12:55:25

MKII-174-P3 #80-97 RT: 1.33-1.57 AV: 18 NL: 3.01E7  
T: FTMS (1,1) + p ESI Full ms [100.00-1500.00]

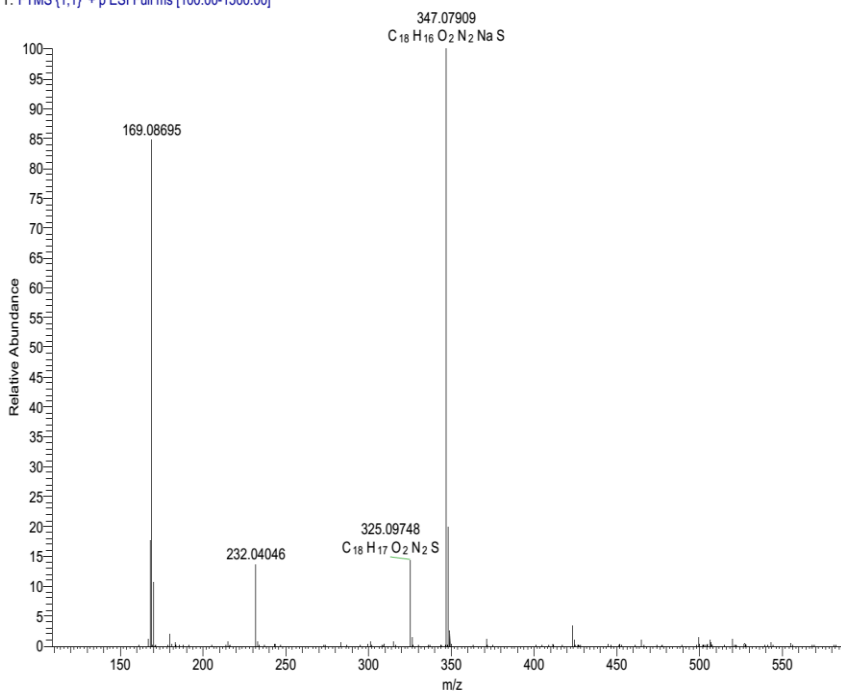

HRMS Spectrum of Compound **4h**

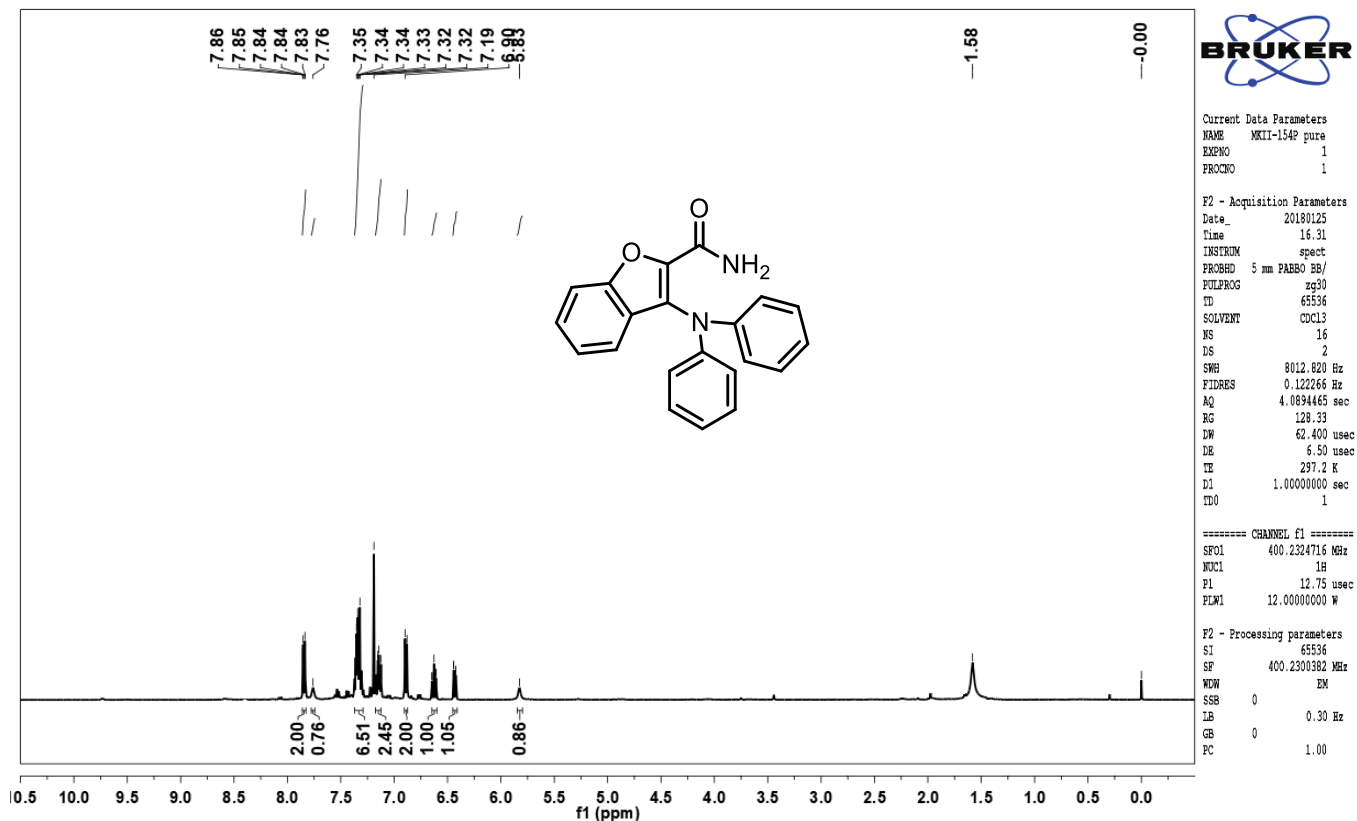

**<sup>1</sup>H NMR Spectrum of Compound 4i**

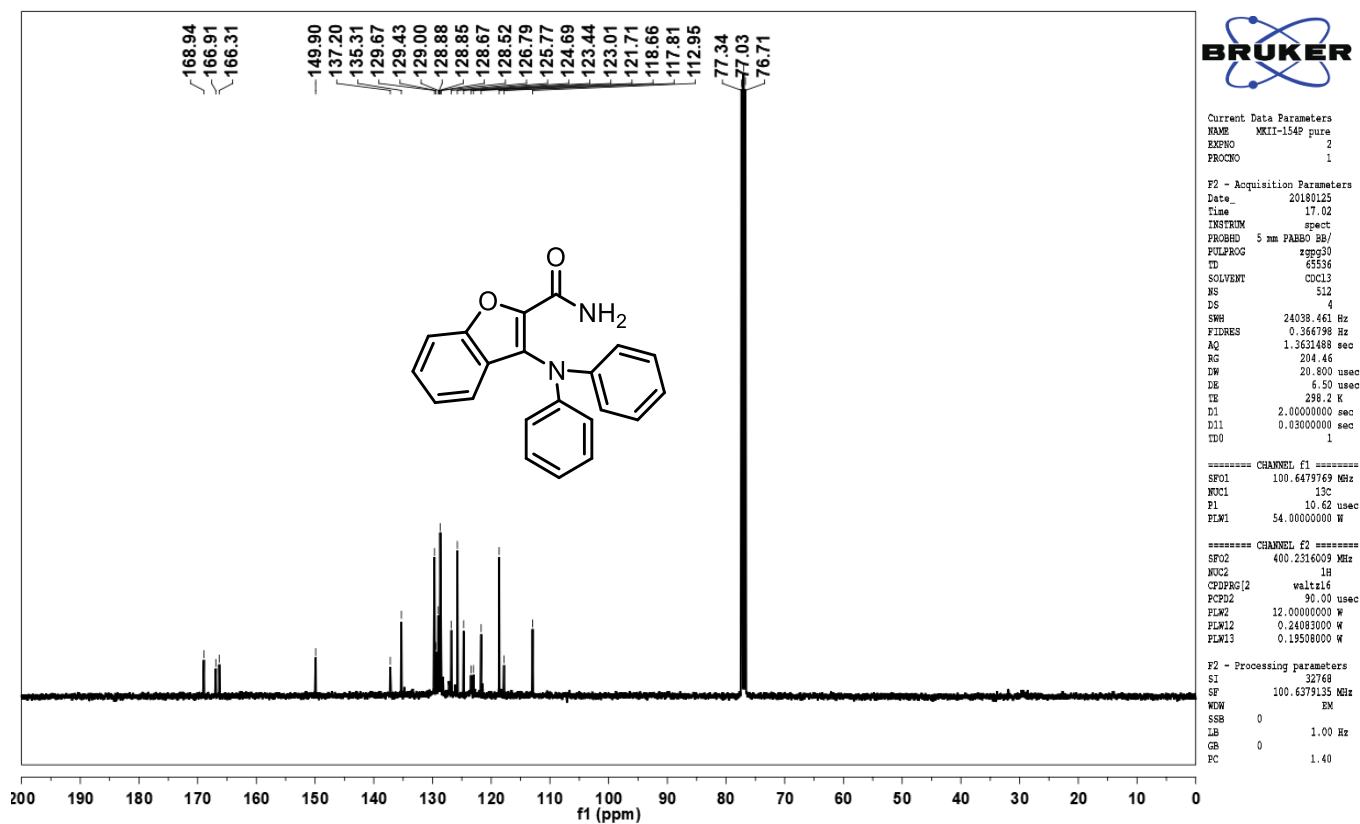

**<sup>13</sup>C NMR Spectrum of Compound 4i**

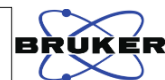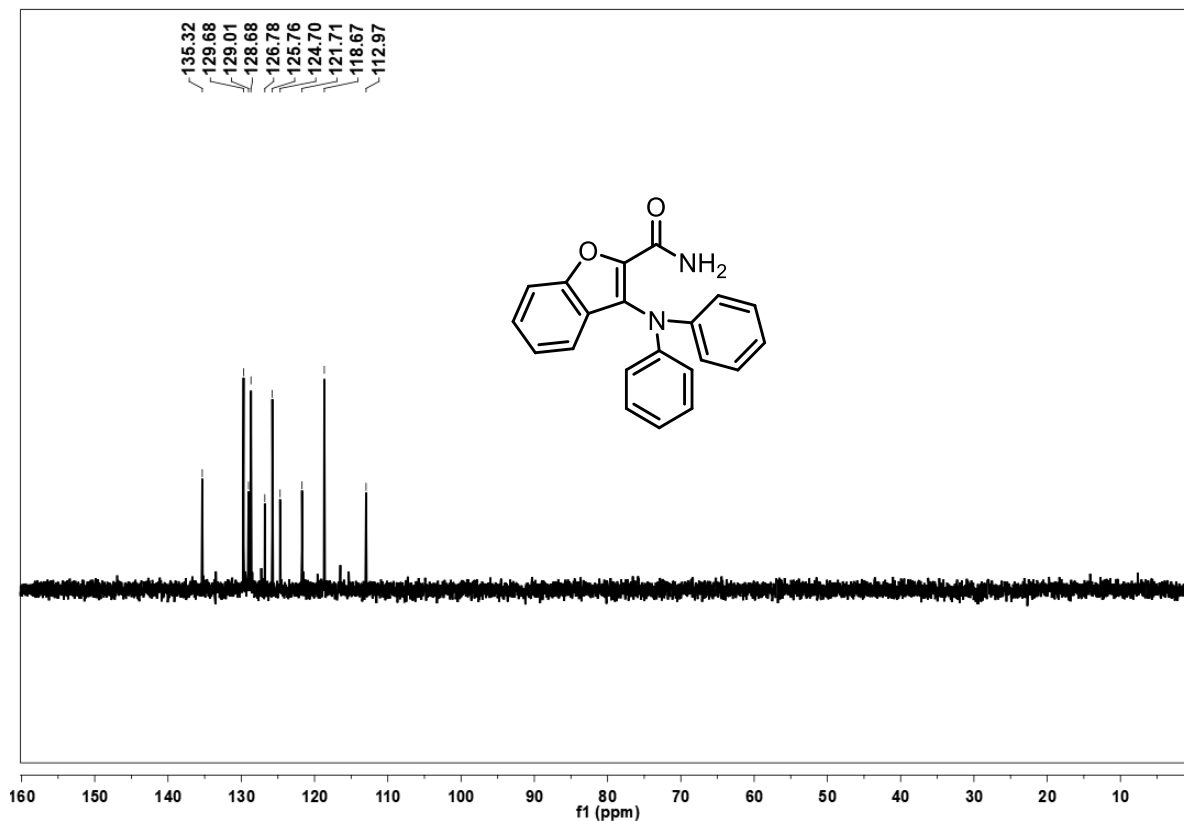

Current Data Parameters  
NAME MKII-154 pure  
EXPRO 3  
PROCNO 1

F2 - Acquisition Parameters  
Date\_ 20180125  
Time 17.20  
INSTRUM spect  
PROBHD 5 mm PABBO BB/  
PULPROG deptpi135  
TD 45536  
SOLVENT CDCL3  
NS 256  
DS 4  
SWH 16129.032 Hz  
FIDRES 0.246110 Hz  
AQ 2.0316160 sec  
RG 204.46  
DW 31.000 usec  
DE 6.50 usec  
TE 297.6 K  
CNS2 145.000000  
D1 2.00000000 sec  
D2 0.00344828 sec  
D12 0.00002000 sec  
TD0 1

===== CHANNEL f1 =====  
SF01 100.6459641 Mhz  
NUC1 13C  
F1 10.62 usec  
P13 2000.00 usec  
PLW0 0 W  
FLW1 54.00000000 W  
SFOFF5 Cmp4  
SFOAL5 0.500  
SFOFFSS 0 Hz  
SFOVS 9.30539989 W

===== CHANNEL f2 =====  
SF02 400.2312800 Mhz  
NUC2 1H  
CPDPRG2 waltz16  
P3 12.75 usec  
P4 25.50 usec  
PCPD2 90.00 usec  
PLW2 12.00000000 W  
FLW2 0.24083000 W

F2 - Processing parameters  
SI 32768  
SF 100.6379135 Mhz  
WUN EM  
SSB 0  
LB 1.00 Hz  
GB 0  
FC 1.40

DEPT-135 NMR Spectrum of Compound 4i

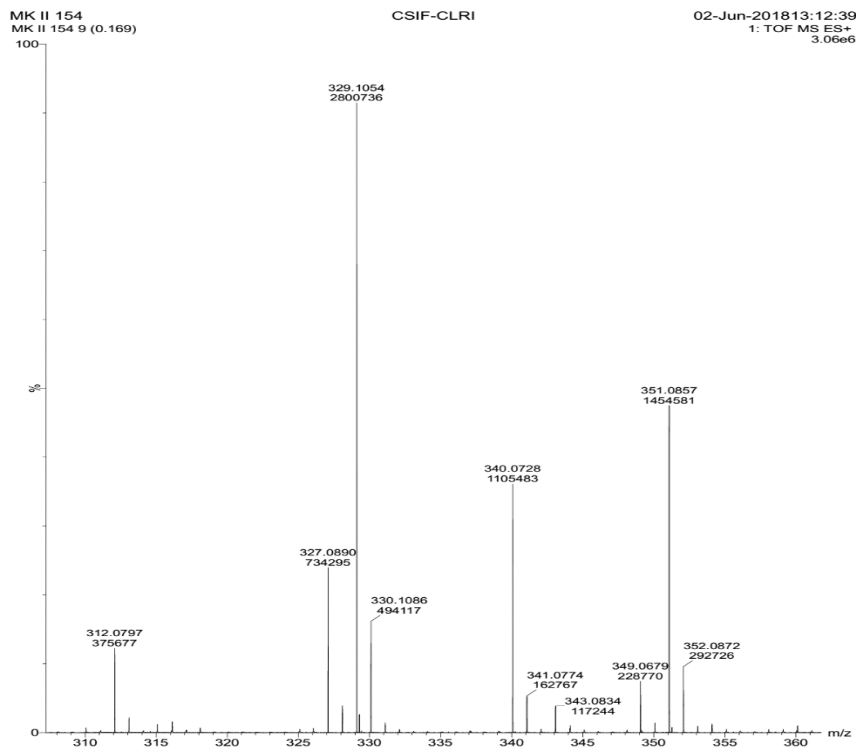

HRMS Spectrum of Compound 4i

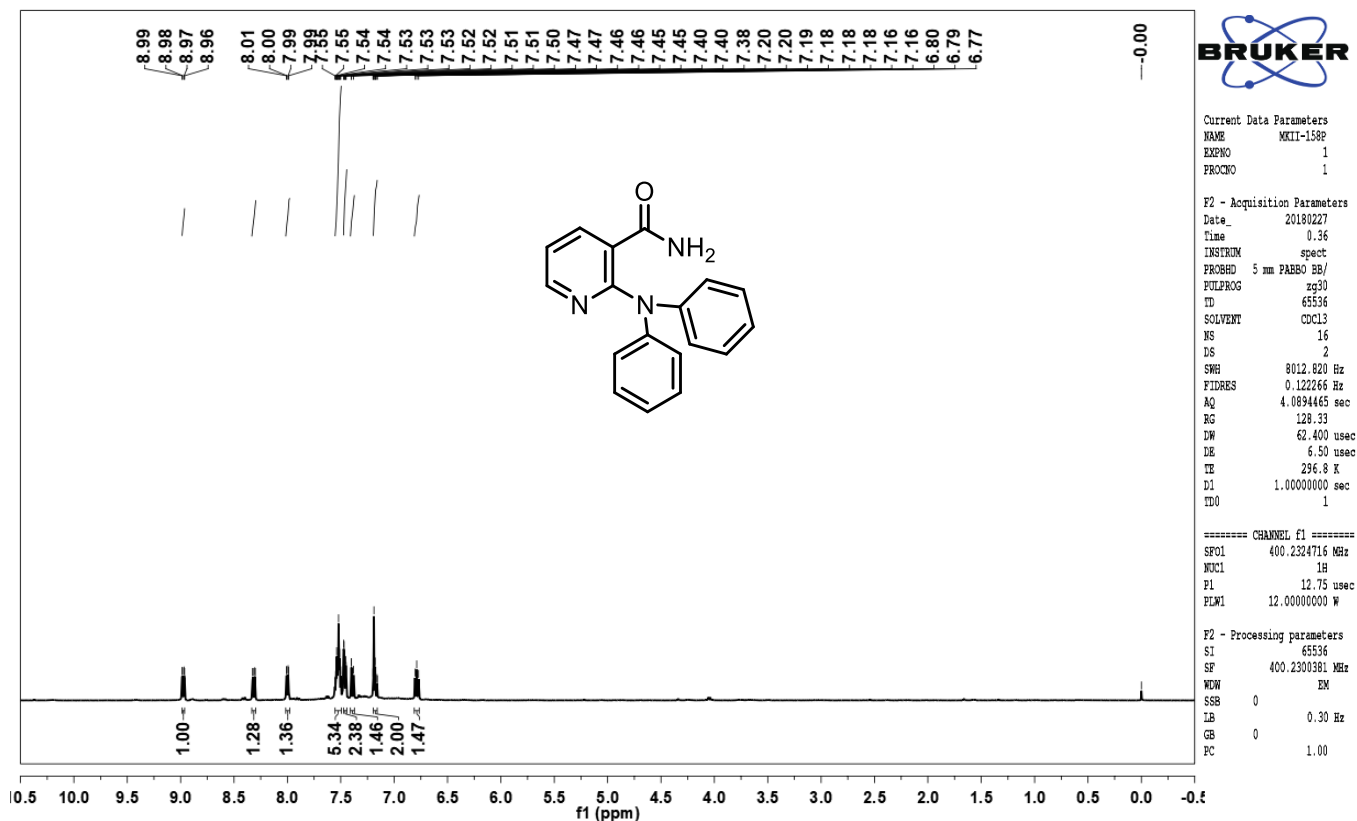

**<sup>1</sup>H NMR Spectrum of Compound 4j**

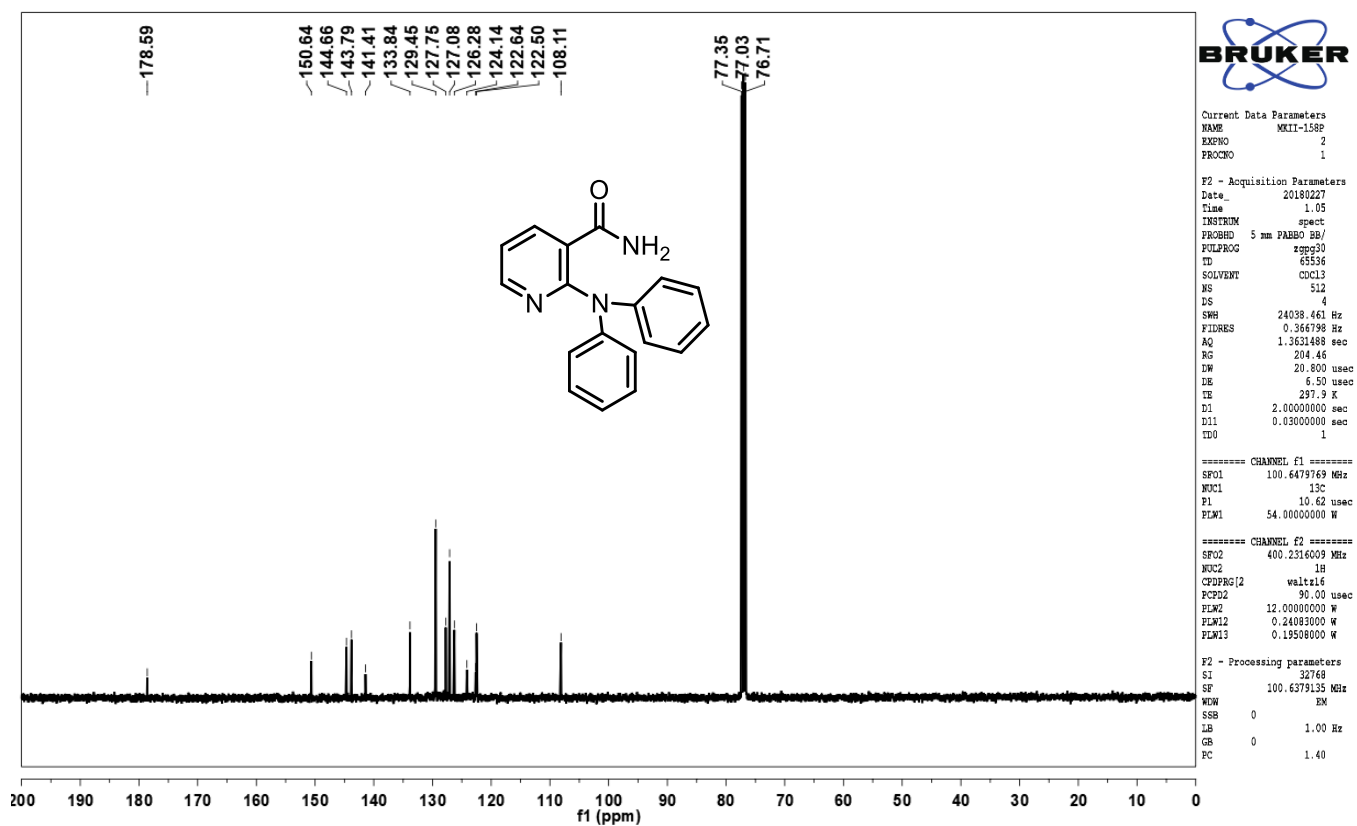

**<sup>13</sup>C NMR Spectrum of Compound 4j**

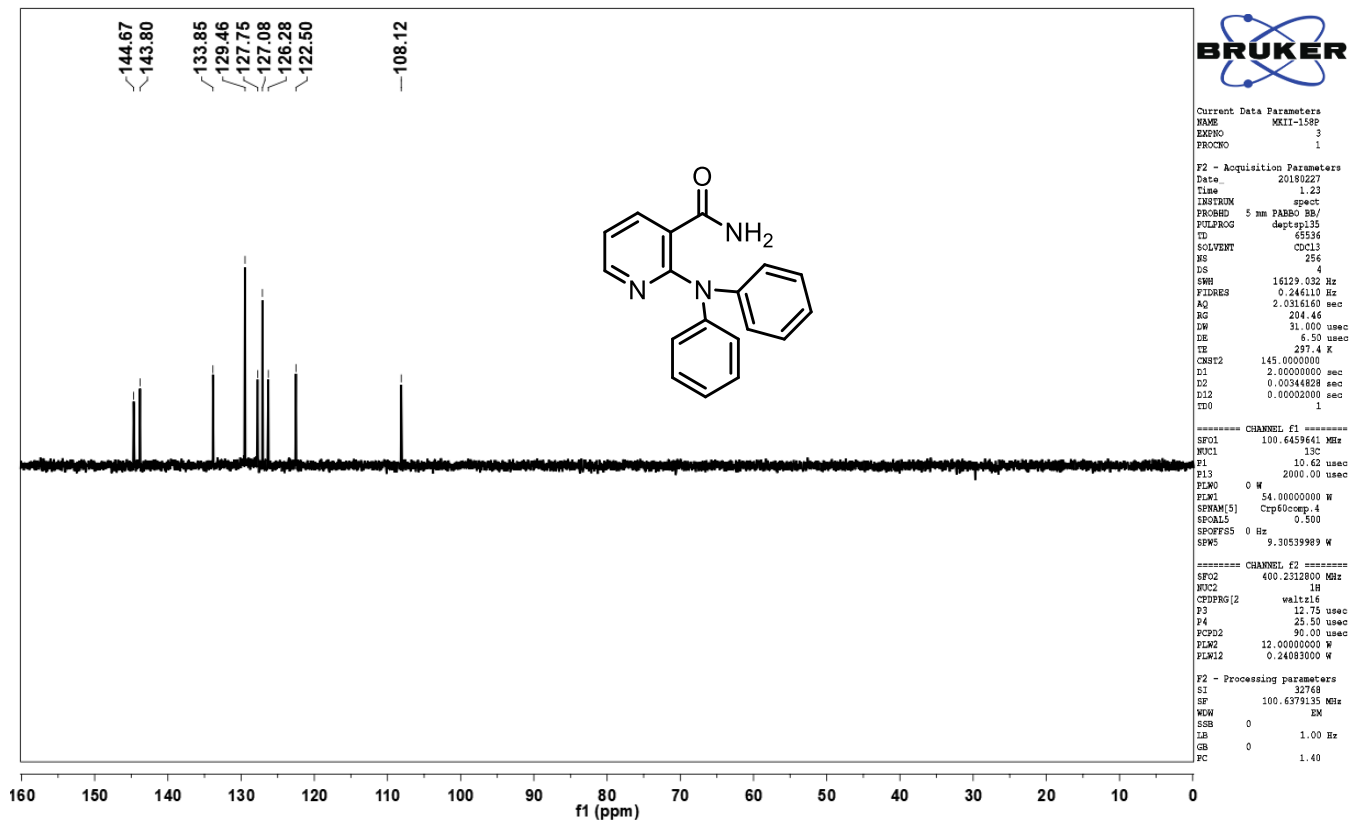

DEPT-135 NMR Spectrum of Compound **4j**

W:\Data\2018\April-2018\MKII-158

04-05-2018 13:01:03

MKII-158 #60-73 RT: 1.04-1.23 AV: 14 NL: 4.20E5  
 T: FTMS (1,1) + p ESI Full lock ms [100.00-1500.00]

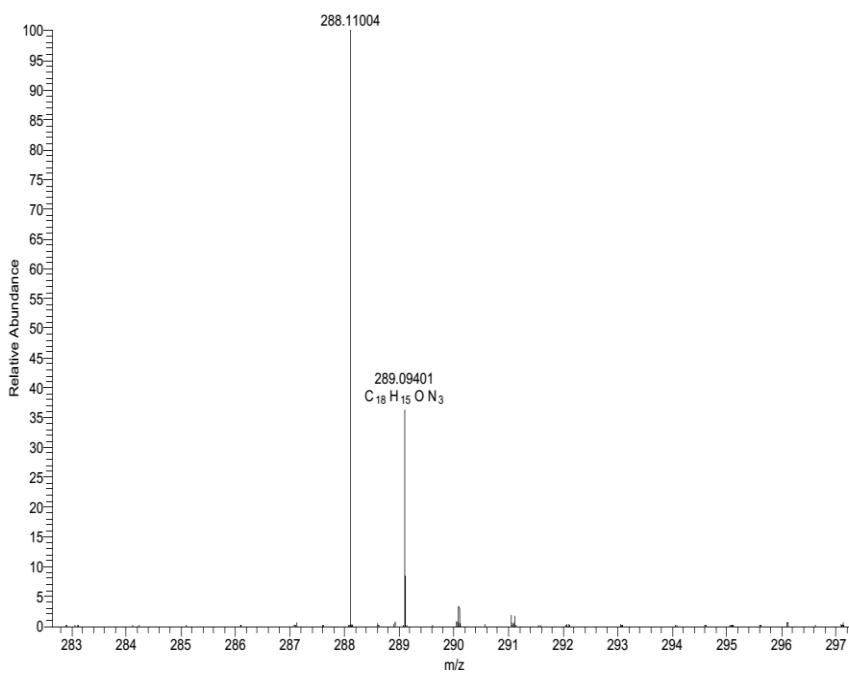

HRMS Spectrum of Compound **4j**

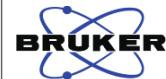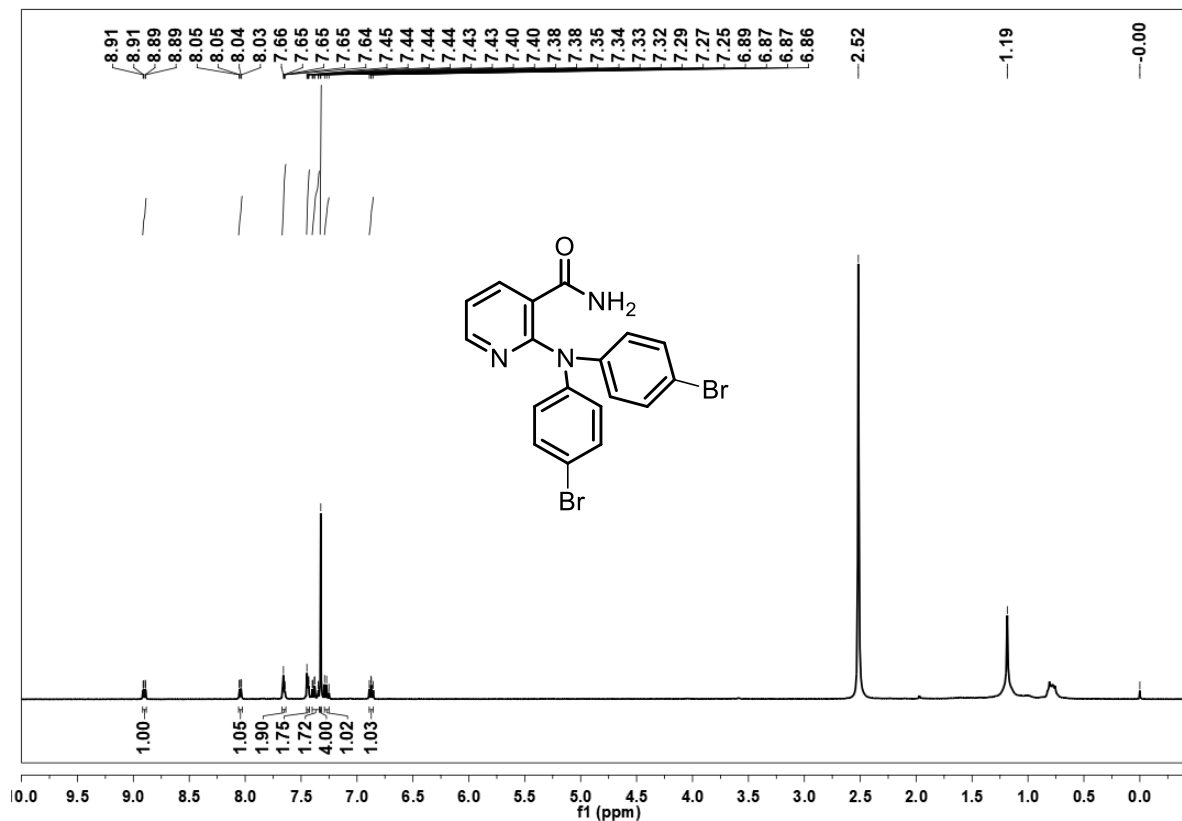

Current Data Parameters  
NAME MK-II-160  
EXPNO 1  
PROCNO 1

F2 - Acquisition Parameters  
Date\_ 20180220  
Time 0.14  
INSTRUM spect  
PROBHD 5 mm PABBO BB/  
PULPROG zg30  
TD 65536  
SOLVENT CDCl3  
NS 16  
DS 2  
SWH 8012.820 Hz  
FIDRES 0.122266 Hz  
AQ 4.0894465 sec  
RG 182.6  
LW 62.400 usec  
DE 6.50 usec  
TE 0 K  
D1 1.0000000 sec  
TD0 1

==== CHANNEL f1 =====  
SF01 400.2324715 MHz  
NUC1 1H  
P1 12.75 usec  
PLW1 12.00000000 W

F2 - Processing parameters  
SI 65536  
SF 400.2298839 MHz  
WDW EM  
SSB 0  
LB 0.30 Hz  
GB 0  
PC 1.00

<sup>1</sup>H NMR Spectrum of Compound 4k

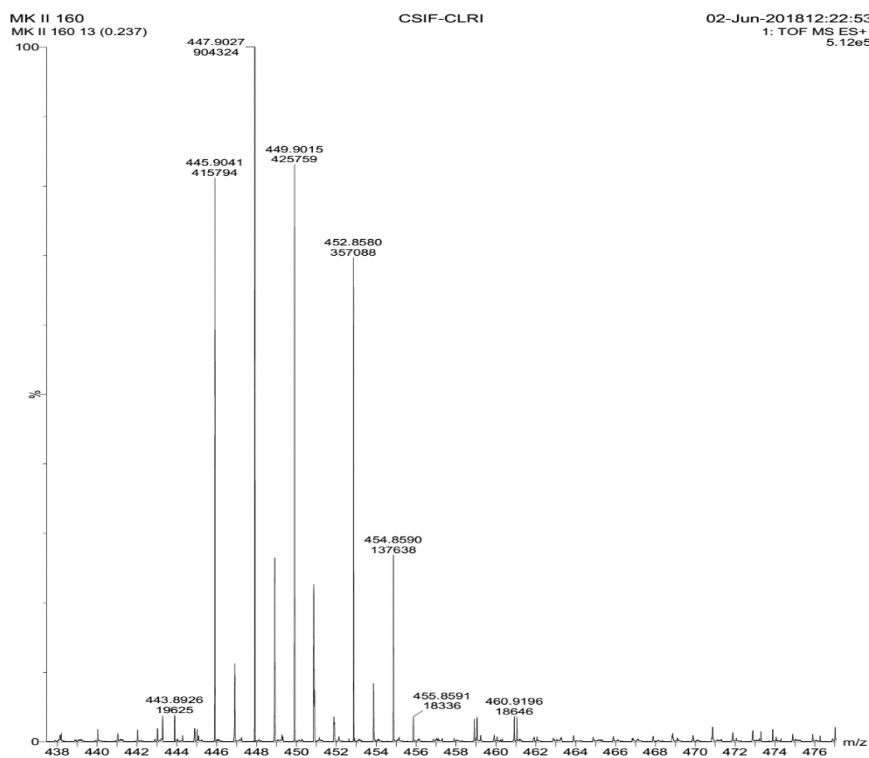

HRMS Spectrum of Compound 4k

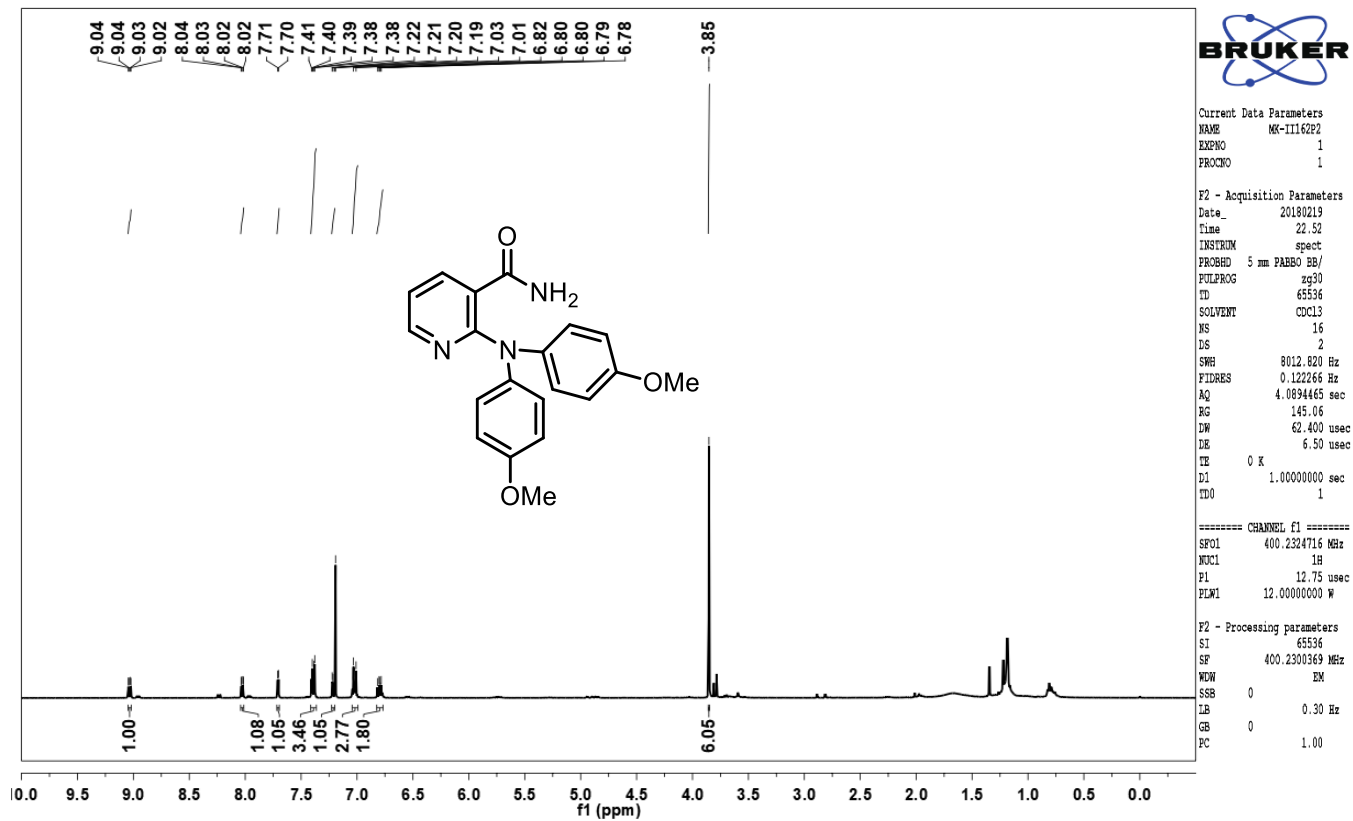

**<sup>1</sup>H NMR Spectrum of Compound 4I**

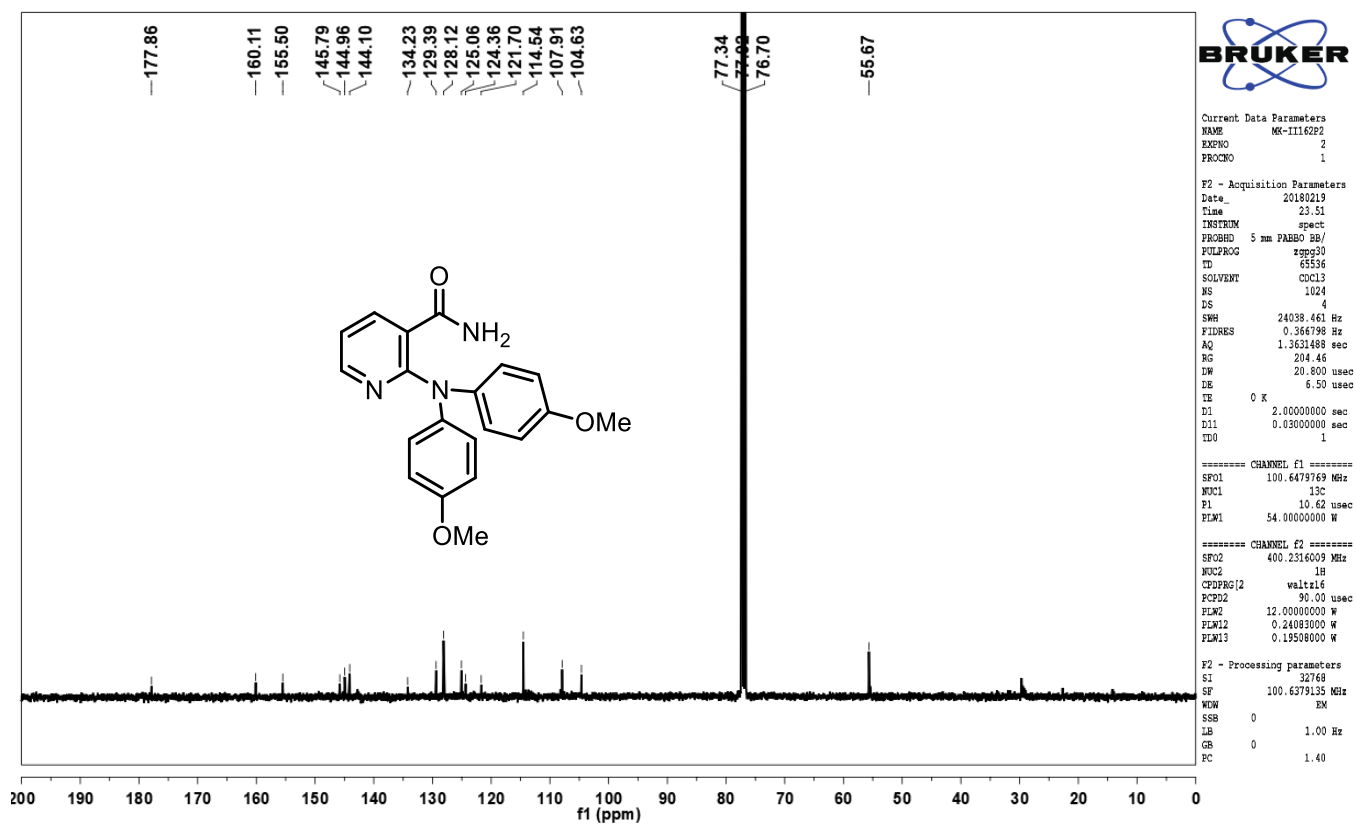

**<sup>13</sup>C NMR Spectrum of Compound 4I**



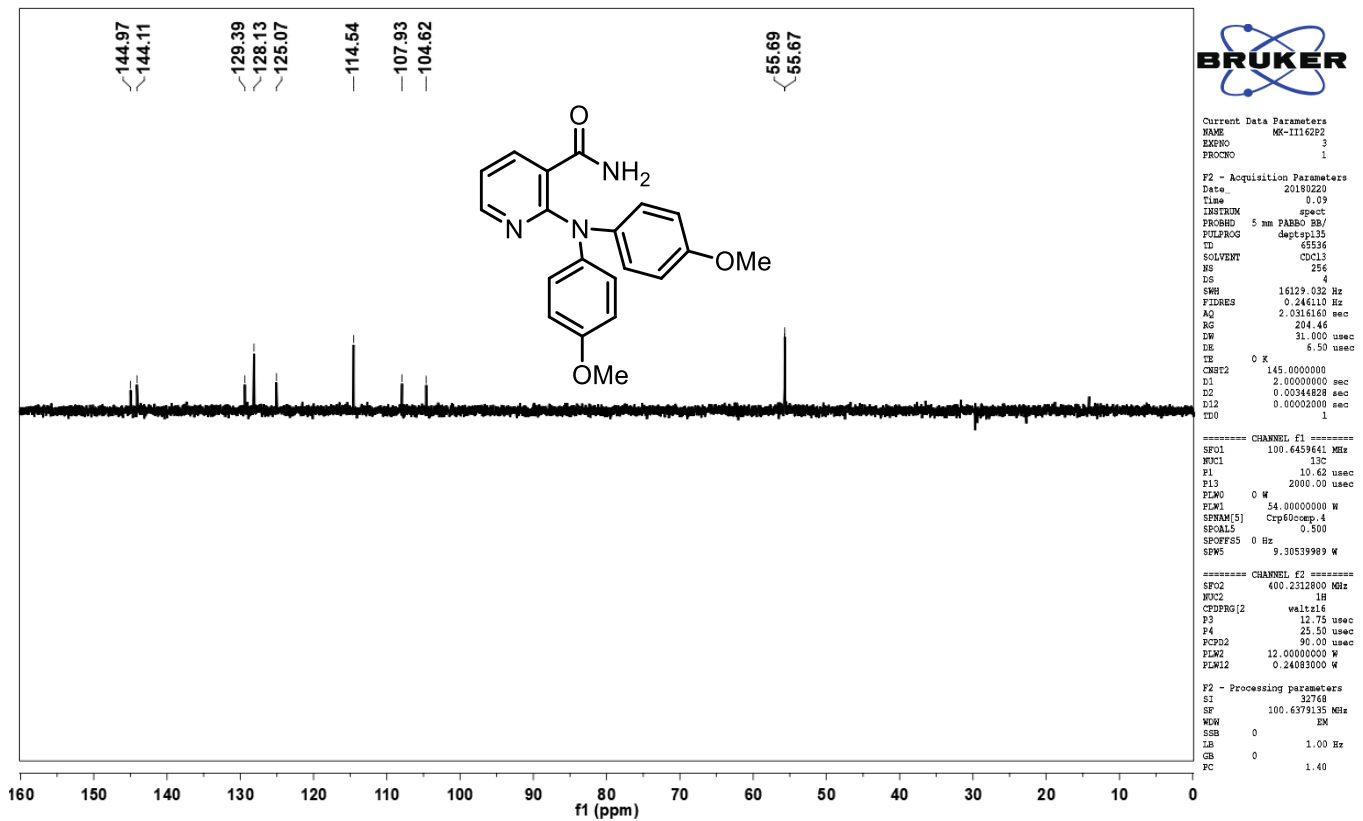

DEPT-135 NMR Spectrum of Compound **4I**

W:\Data\2018\April-2018\MKII-162P1

04-05-2018 13:18:01

MKII-162P1 #102 RT: 1.62 AV: 1 NL: 2.19E6  
 T: FTMS (1,1) + p ESI Full lock ms [100.00-1500.00]

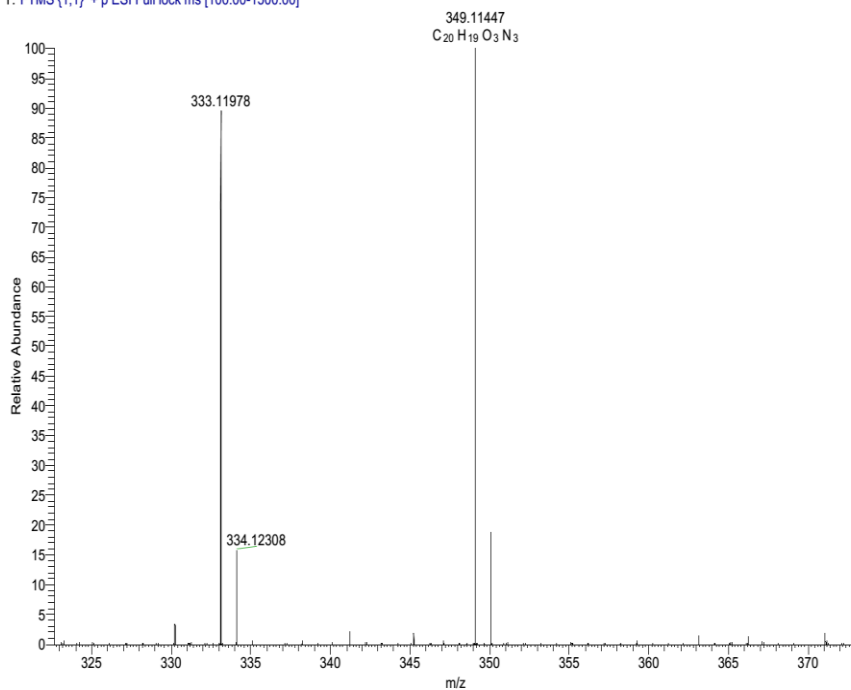

HRMS Spectrum of Compound **4I**

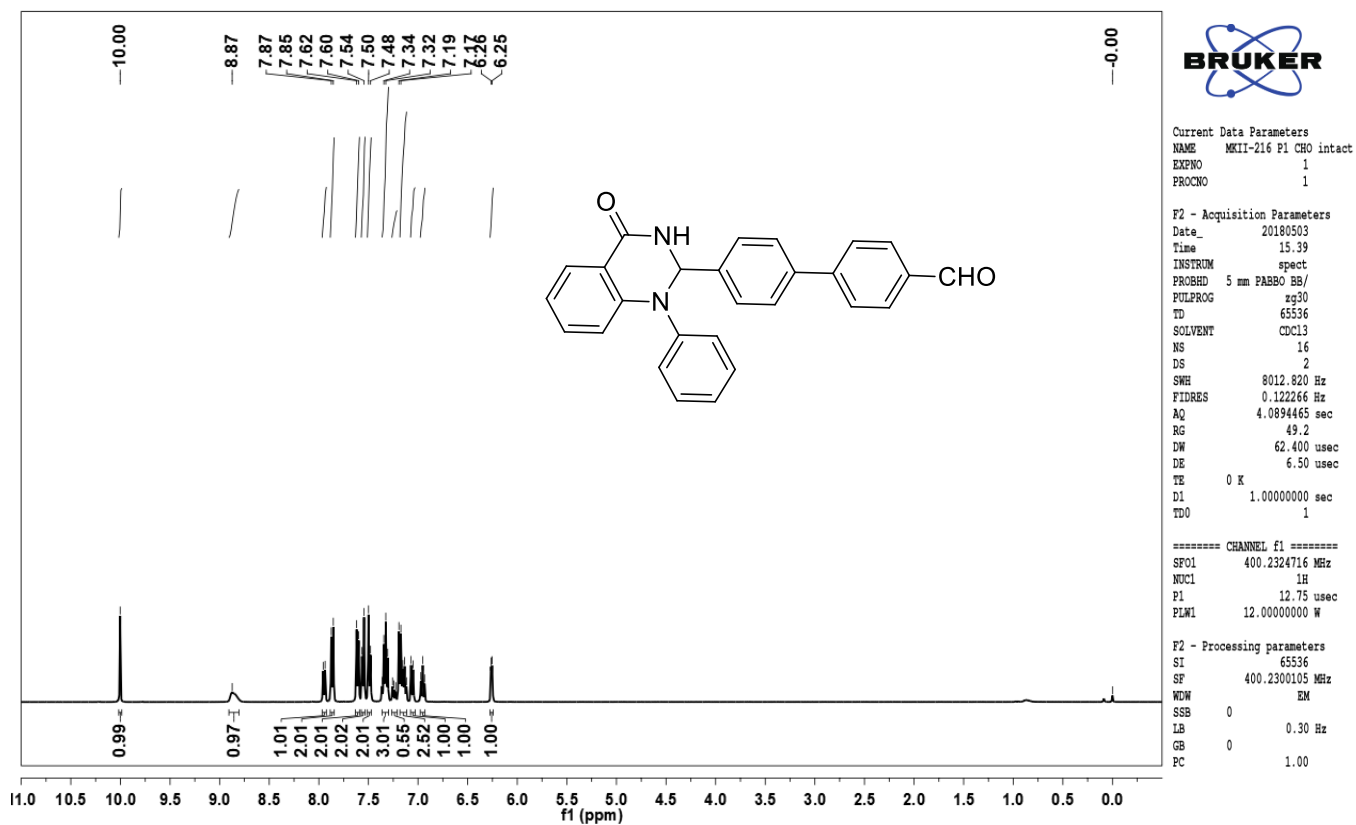

**<sup>1</sup>H NMR Spectrum of Compound 5a**

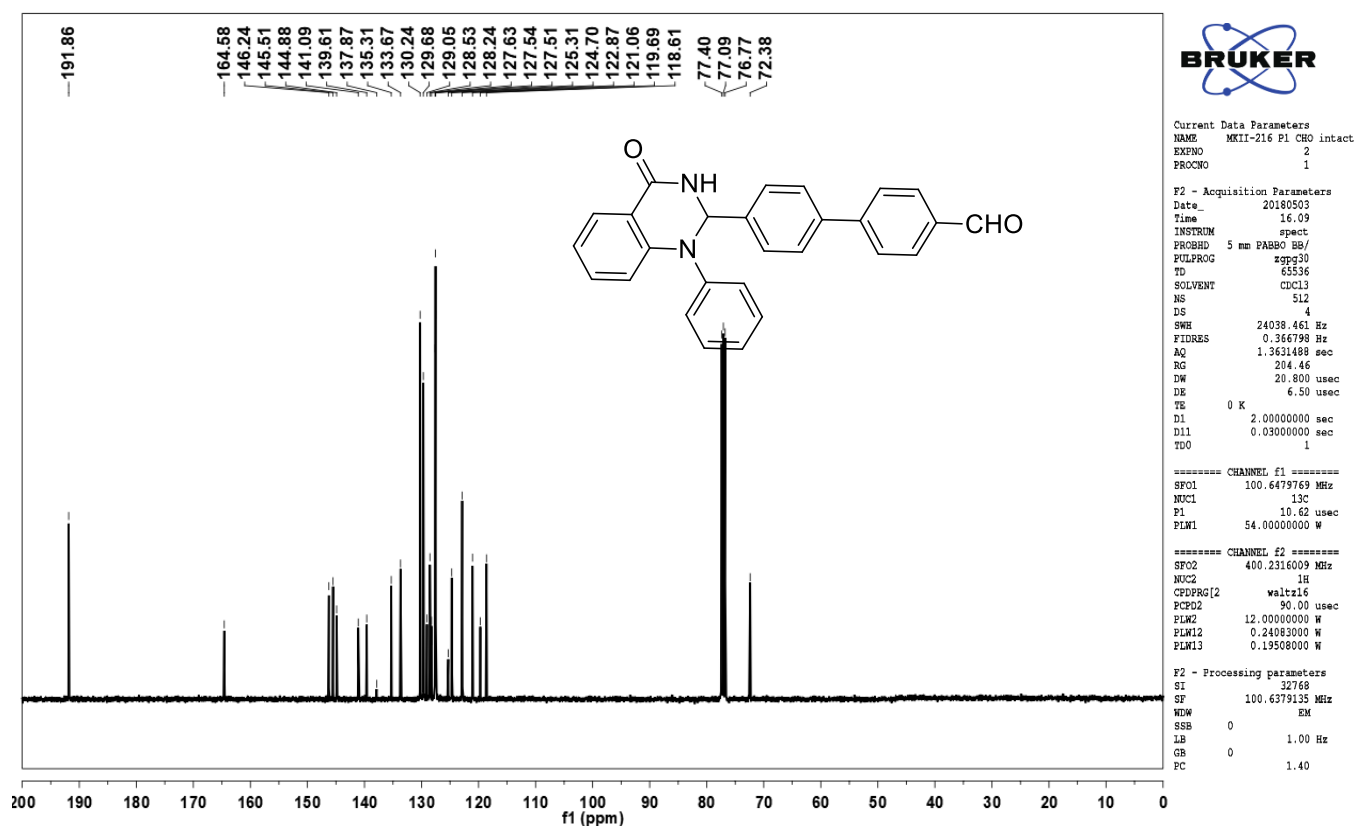

**<sup>13</sup>C NMR Spectrum of Compound 5a**

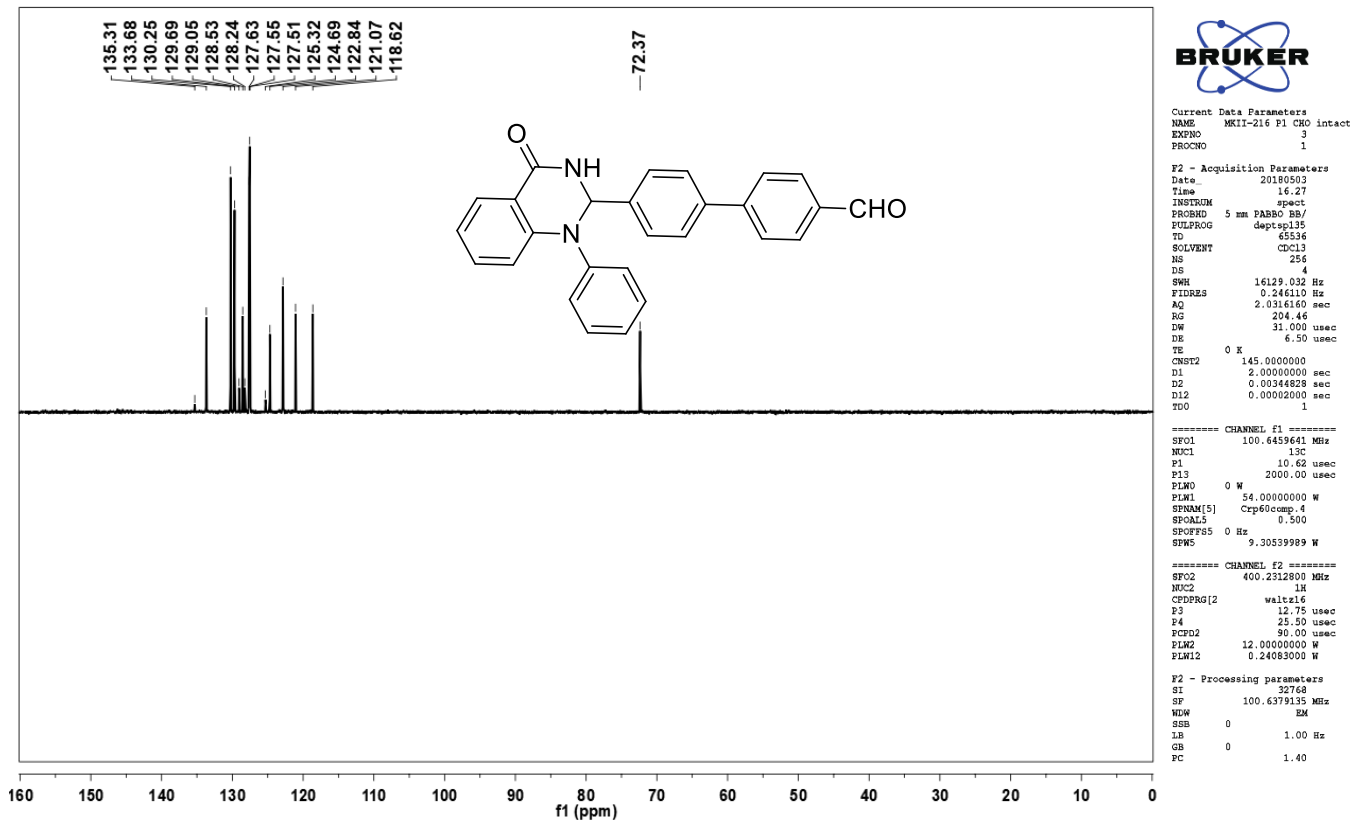

DEPT-135 NMR Spectrum of Compound 5a

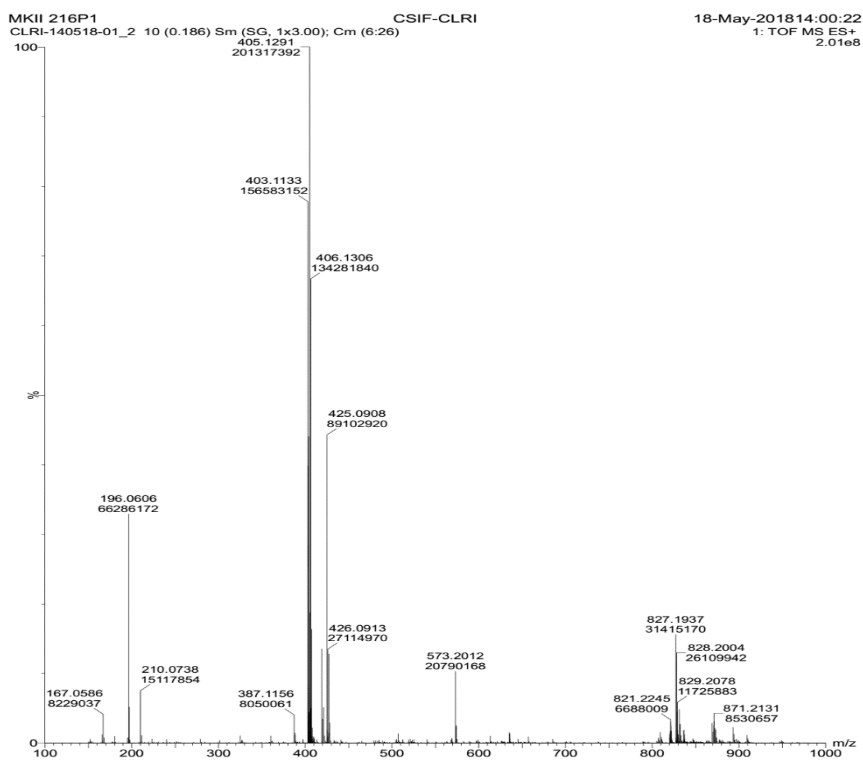

HRMS Spectrum of Compound 5a

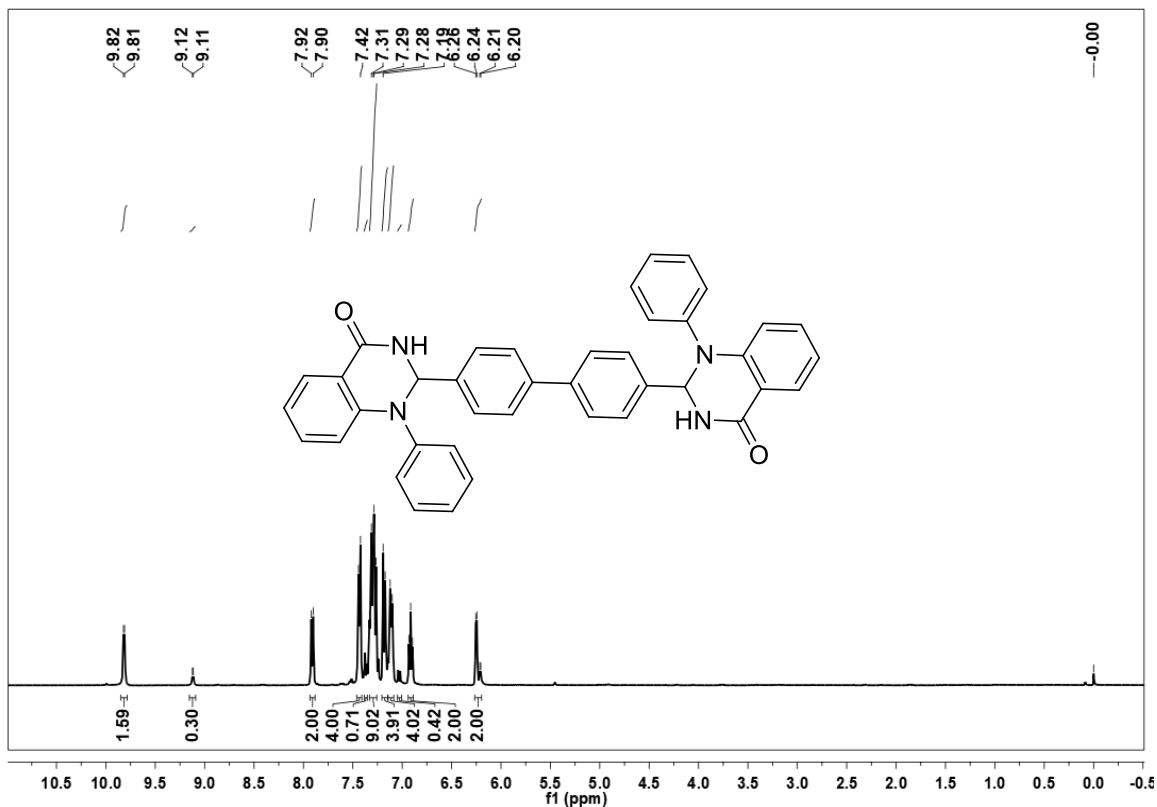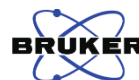

Current Data Parameters  
 NAME MKII-216RP2  
 EXPNO 1  
 PROCNO 1

F2 - Acquisition Parameters  
 Date\_ 20180515  
 Time 23.35  
 INSTRUM spect  
 PROBHD 5 mm PABBO BB/  
 PULPROG zg30  
 TD 65536  
 SOLVENT CDCl3  
 NS 16  
 DS 2  
 SWH 8012.820 Hz  
 FIDRES 0.122266 Hz  
 AQ 4.0894465 sec  
 RG 49.2  
 DW 62.400 usec  
 DE 6.50 usec  
 TE 297.5 K  
 D1 1.00000000 sec  
 TD0 1

==== CHANNEL f1 =====  
 SF01 400.2324716 MHz  
 NUC1 1H  
 P1 12.75 usec  
 PLW1 12.00000000 W

F2 - Processing parameters  
 SI 65536  
 SF 400.2300168 MHz  
 WDW EM  
 SSB 0  
 LB 0.30 Hz  
 GB 0  
 PC 1.00

**<sup>1</sup>H NMR Spectrum of Compound 5b**

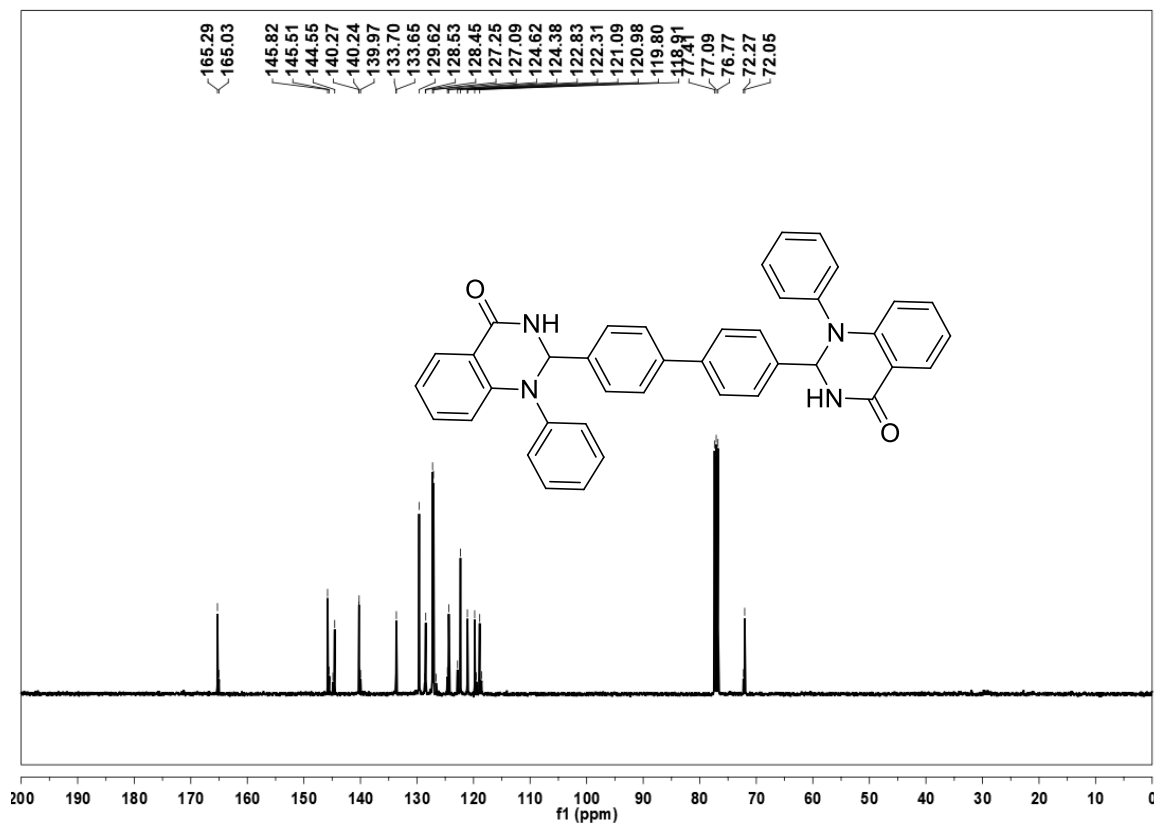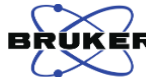

Current Data Parameters  
 NAME MKII-216RP2  
 EXPNO 2  
 PROCNO 1

F2 - Acquisition Parameters  
 Date\_ 20180516  
 Time 0.05  
 INSTRUM spect  
 PROBHD 5 mm PABBO BB/  
 PULPROG zgpg30  
 TD 65536  
 SOLVENT CDCl3  
 NS 512  
 DS 4  
 SWH 24038.461 Hz  
 FIDRES 0.366798 Hz  
 AQ 1.3631488 sec  
 RG 204.46  
 DW 20.800 usec  
 DE 6.50 usec  
 TE 298.5 K  
 D1 2.00000000 sec  
 D11 0.03000000 sec  
 TD0 1

==== CHANNEL f1 =====  
 SF01 100.6479769 MHz  
 NUC1 13C  
 P1 10.62 usec  
 PLW1 54.00000000 W

==== CHANNEL f2 =====  
 SF02 400.2316009 MHz  
 NUC2 1H  
 CDDPRG(2) waltz16  
 FCPD2 90.00 usec  
 PLW2 12.00000000 W  
 PLW12 0.24083000 W  
 PLW13 0.19508000 W

F2 - Processing parameters  
 SI 32768  
 SF 100.6379135 MHz  
 WDW EM  
 SSB 0  
 LB 1.00 Hz  
 GB 0  
 PC 1.40

**<sup>13</sup>C NMR Spectrum of Compound 5b**

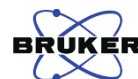

Current Data Parameters  
NAME MKII-216RP2  
EXPNO 3  
PROCNO 1

F2 - Acquisition Parameters  
Date 20180516  
Time 0.22  
INSTRUM spect  
PROBHD 5 mm PABBO BB/  
PULPROG deptsp135  
TD 65536  
SOLVENT cdc13  
NS 256  
DS 4  
SWH 16129.032 Hz  
FIDRES 0.246110 Hz  
AQ 2.0316160 sec  
RG 204.46  
DW 31.000 usec  
DE 6.50 usec  
TE 297.8 K  
CNS2 145.000000  
D1 2.00000000 sec  
D2 0.00344828 sec  
D12 0.00002000 sec  
TD0 1

==== CHANNEL F1 =====  
SFO1 100.6459641 MHz  
NUC1 13C  
P1 10.62 usec  
P13 2000.00 usec  
PLW0 0 W  
PLW1 54.00000000 W  
SPNAM[5] Crp60comp\_4  
SFOAL5 0.500  
SPOFFS5 0 Hz  
SPW5 9.30539989 W

==== CHANNEL F2 =====  
SFO2 400.2312800 MHz  
NUC2 1H  
CDEPRG[2] waltz16  
P3 12.75 usec  
P4 25.50 usec  
PCPD2 90.00 usec  
PLW2 12.00000000 W  
PLW12 0.24083000 W

F2 - Processing parameters  
SI 32768  
SF 100.6379135 MHz  
WDW EM  
SBB 0  
LB 1.00 Hz  
GB 0  
PC 1.40

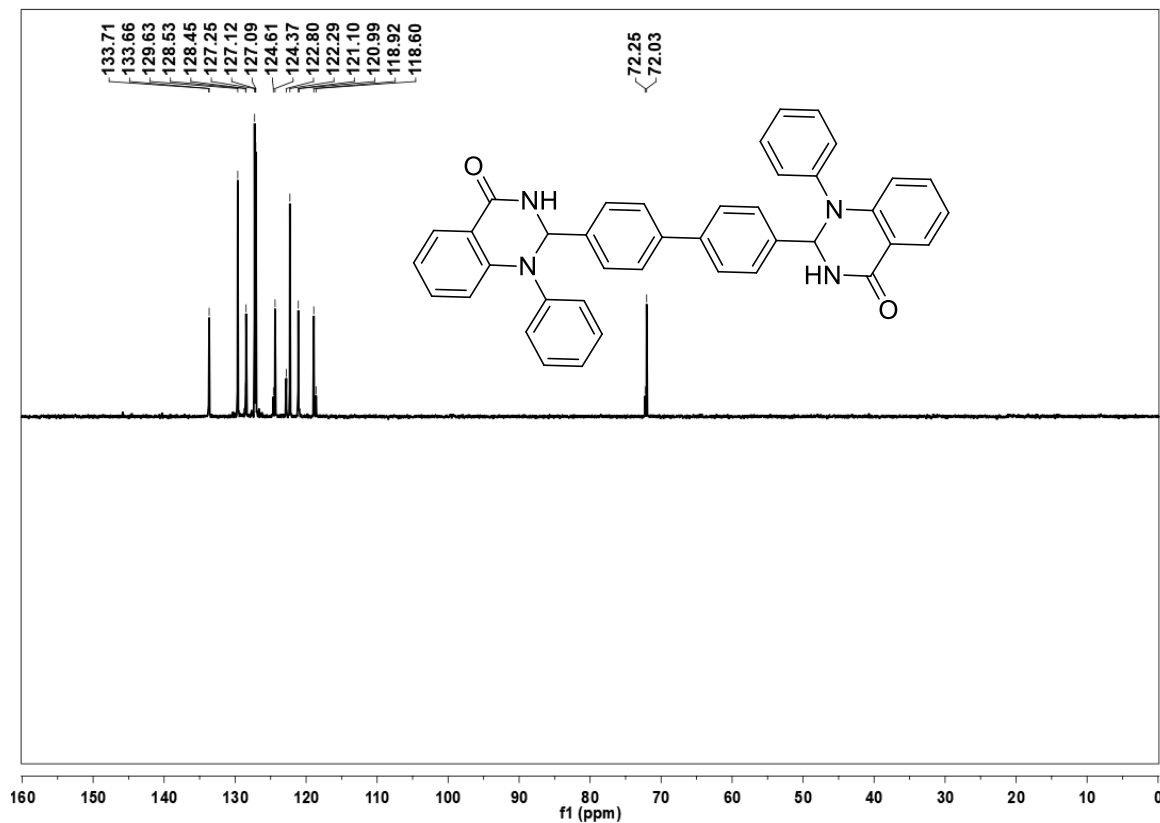

DEPT-135 NMR Spectrum of Compound **5b**

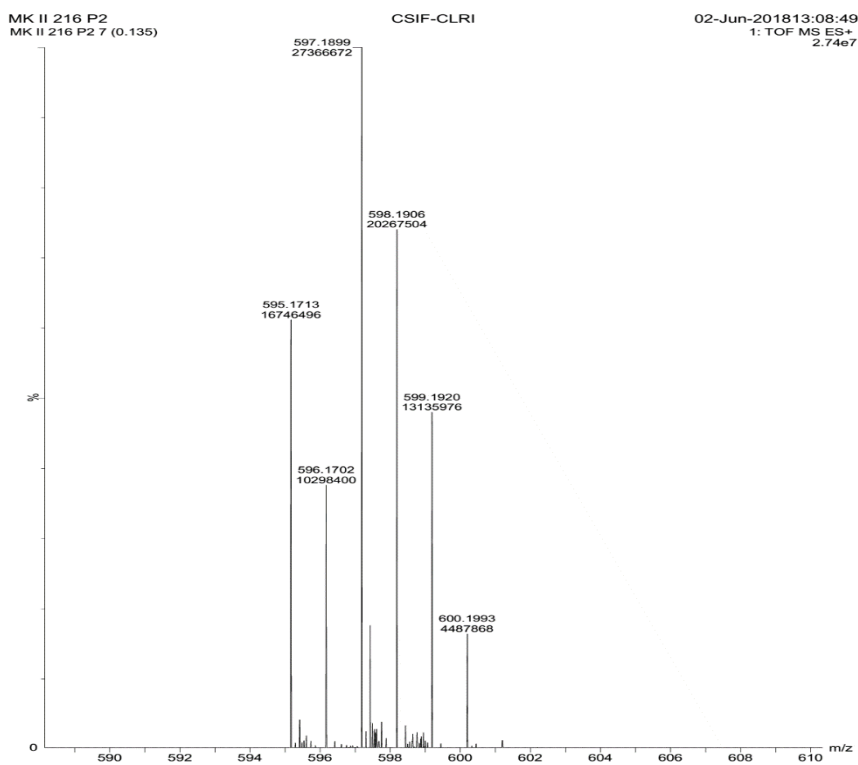

HRMS Spectrum of Compound **5b**

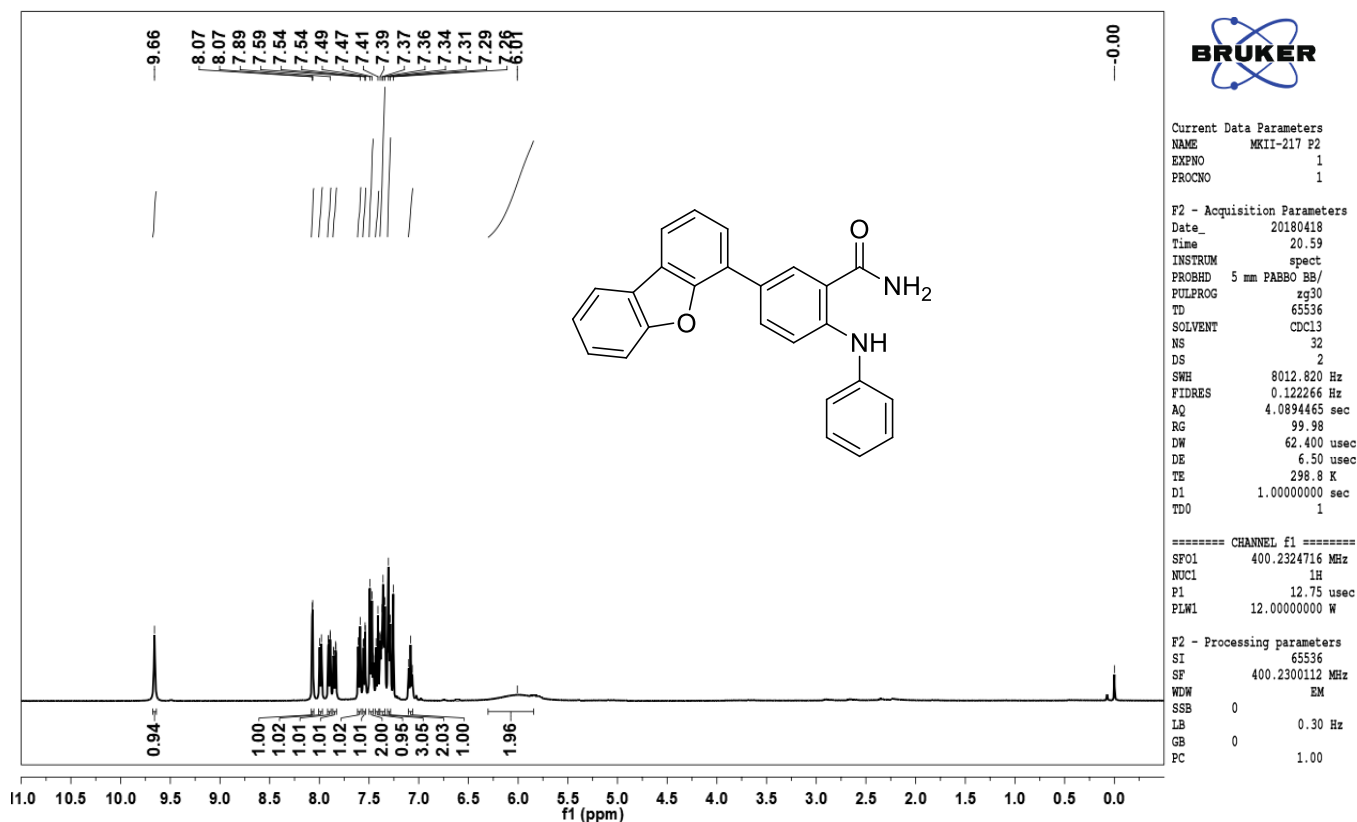

**1H NMR Spectrum of Compound 6a**

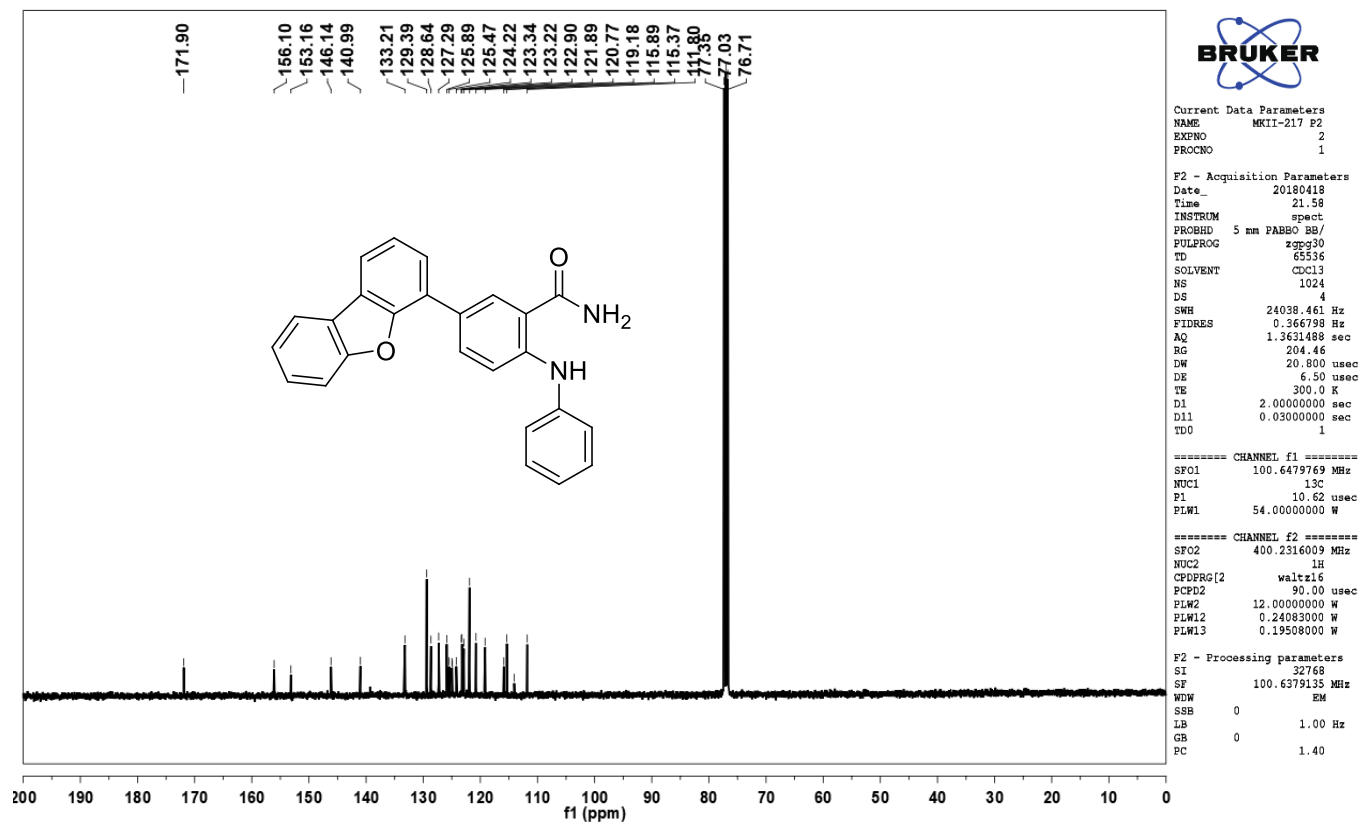

**13C NMR Spectrum of Compound 6a**

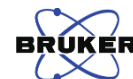

Current Data Parameters  
NAME MKII-217 F2  
EXNO 3  
PROCNO 1

F2 - Acquisition Parameters  
Date 20180418  
Time 22.16  
INSTRUM spect  
PROBHD 5 mm PABBO BB/  
PULPROG deptsp135  
TD 65536  
SOLVENT CDCl3  
NS 256  
DS 4  
SWH 16129.032 Hz  
FIDRES 0.246110 Hz  
AQ 2.0316160 sec  
RG 204.46  
DW 31.000 usec  
DE 6.50 usec  
TE 299.4 K  
CNS2 145.000000  
D1 2.0000000 sec  
D2 0.00344828 sec  
D12 0.00002000 sec  
TD 1

===== CHANNEL f1 =====  
SFO1 100.6459641 MHz  
NUC1 13C  
P1 10.62 usec  
P13 2000.00 usec  
PLW0 0 W  
PLW1 54.00000000 W  
SPNAM[5] Crp60comp.4  
SFOALS 0.500  
SPOFFS5 0 Hz  
SPW5 9.30539989 W

===== CHANNEL f2 =====  
SFO2 400.2312800 MHz  
NUC2 1H  
CPDPRG[2] waltz16  
P3 12.75 usec  
P4 25.50 usec  
PCPD2 90.00 usec  
PLW2 12.00000000 W  
PLW12 0.24083000 W

F2 - Processing parameters  
SI 32768  
SF 100.6379135 MHz  
WDW EM  
SBB 0  
LB 1.00 Hz  
GB 0  
PC 1.40

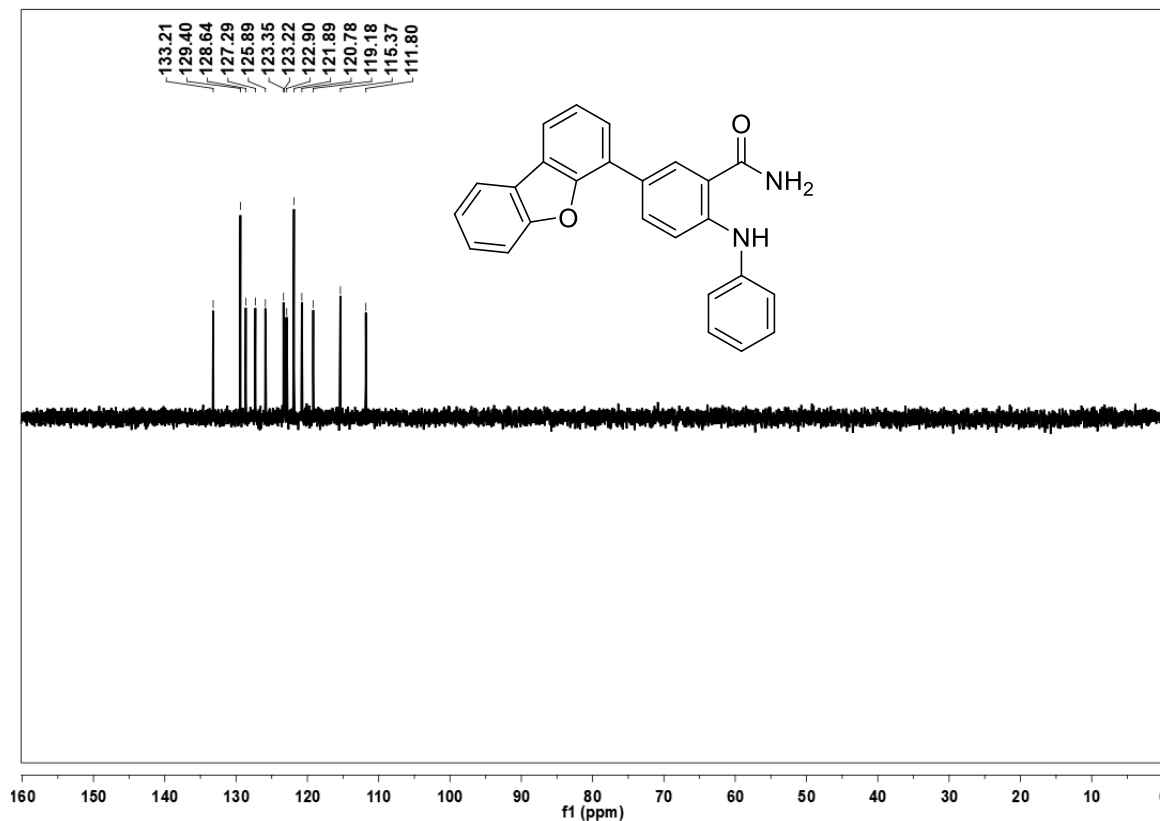

W:\Data\2018\April-2018\MKII-217P2

04-05-2018 13:06:43

MKII-217P2 #95-108 RT: 1.61-1.79 AV: 14 NL: 7.36E6  
T: FTMS (1,1) + p ESI Full lock ms [100.00-1500.00]

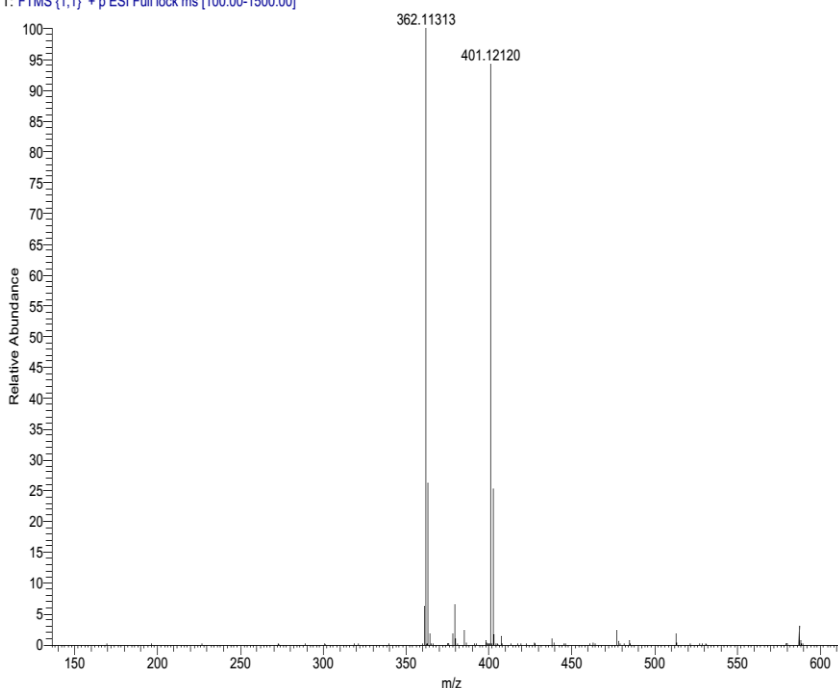

HRMS Spectrum of Compound 6a

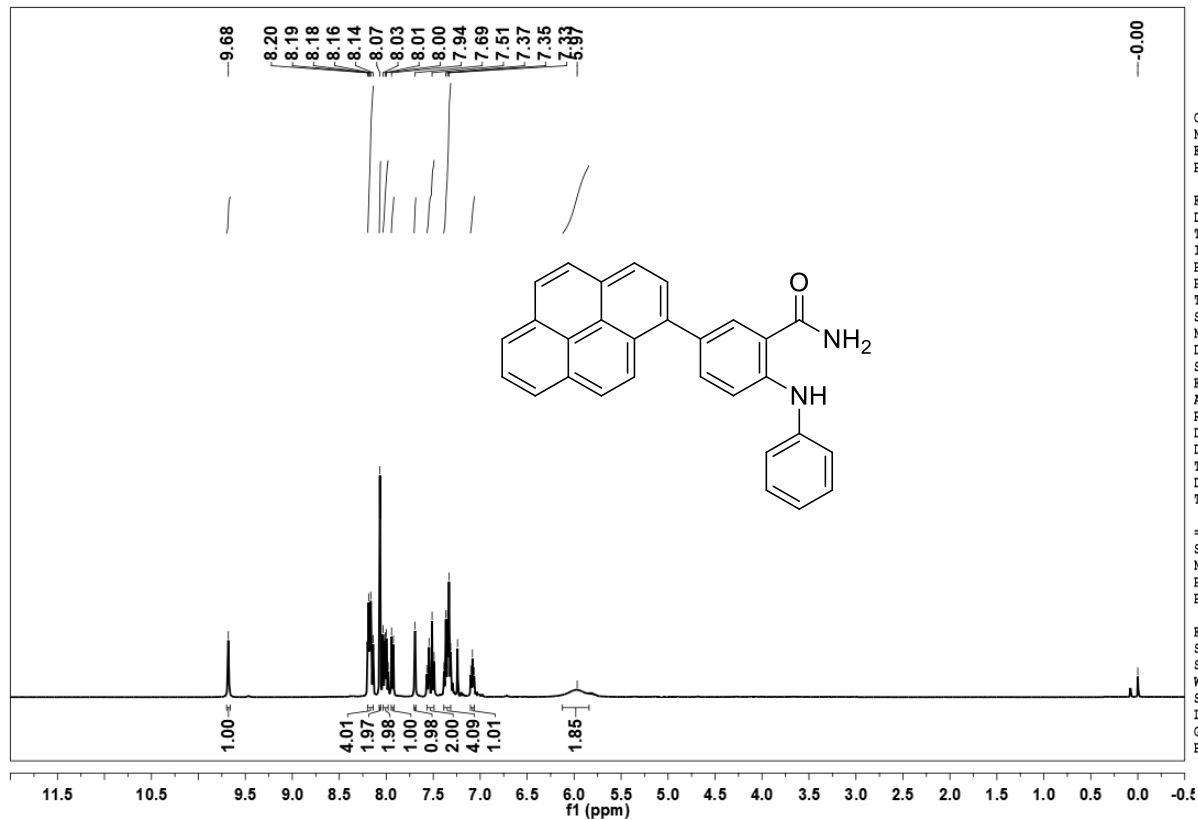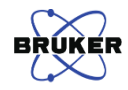

Current Data Parameters  
 NAME MKII-227  
 EXPNO 1  
 PROCNO 1

F2 - Acquisition Parameters  
 Date\_ 20180522  
 Time 23.50  
 INSTRUM spect  
 PROBHD 5 mm PABBO BB/  
 PULPROG zg30  
 TD 65536  
 SOLVENT CDCl3  
 NS 16  
 DS 2  
 SWH 8012.820 Hz  
 FIDRES 0.122266 Hz  
 AQ 4.0894465 sec  
 RG 79.6  
 DW 62.400 usec  
 DE 6.50 usec  
 TE 296.3 K  
 D1 1.00000000 sec  
 TD0 1

==== CHANNEL f1 =====  
 SFO1 400.2324716 MHz  
 NUC1 1H  
 P1 12.75 usec  
 PLW1 12.00000000 W

F2 - Processing parameters  
 SI 65536  
 SF 400.2300170 MHz  
 WDW EM  
 SSB 0  
 LB 0.30 Hz  
 GB 0  
 PC 1.00

<sup>1</sup>H NMR Spectrum of Compound 6b

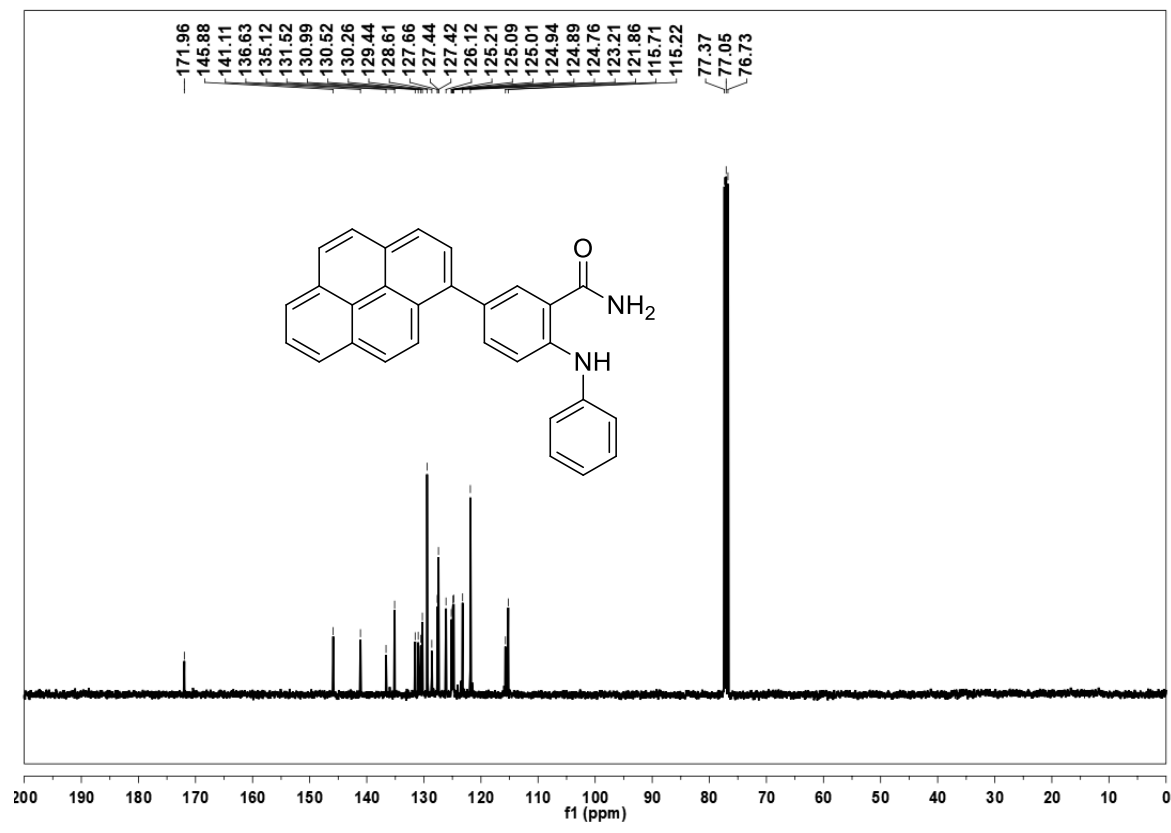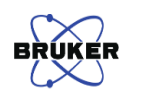

Current Data Parameters  
 NAME MKII-227  
 EXPNO 2  
 PROCNO 1

F2 - Acquisition Parameters  
 Date\_ 20180523  
 Time 0.20  
 INSTRUM spect  
 PROBHD 5 mm PABBO BB/  
 PULPROG zgpg30  
 TD 65536  
 SOLVENT CDCl3  
 NS 512  
 DS 4  
 SWH 24038.461 Hz  
 FIDRES 0.366798 Hz  
 AQ 1.3631488 sec  
 RG 204.46  
 DW 20.800 usec  
 DE 6.50 usec  
 TE 297.4 K  
 D1 2.00000000 sec  
 D11 0.03000000 sec  
 TD0 1

==== CHANNEL f1 =====  
 SFO1 100.6479769 MHz  
 NUC1 13C  
 P1 10.62 usec  
 PLW1 54.00000000 W

==== CHANNEL f2 =====  
 SFO2 400.2316009 MHz  
 NUC2 1H  
 CPDPRG2 waltz16  
 PCPD2 90.00 usec  
 PLW2 12.00000000 W  
 PLW12 0.24083000 W  
 PLW13 0.19508000 W

F2 - Processing parameters  
 SI 32768  
 SF 100.6379135 MHz  
 WDW EM  
 SSB 0  
 LB 1.00 Hz  
 GB 0  
 PC 1.40

<sup>13</sup>C NMR Spectrum of Compound 6b



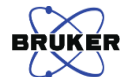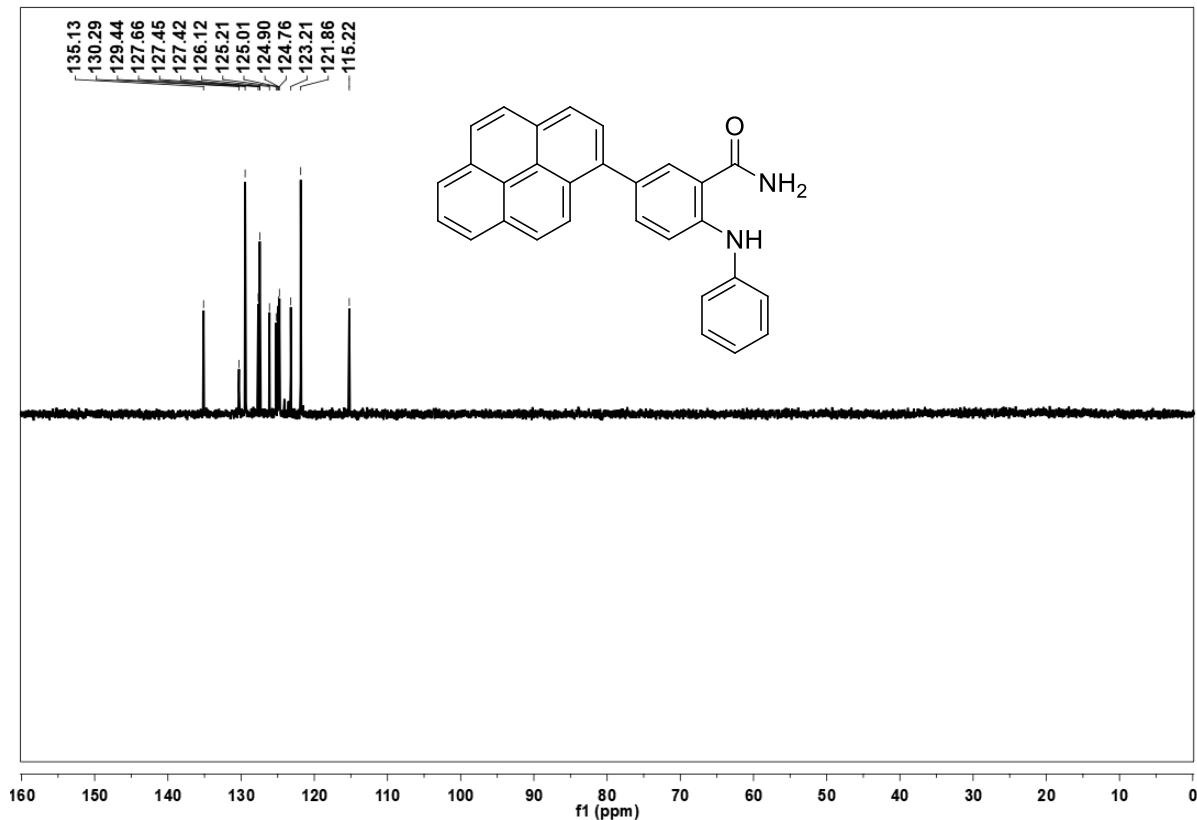

### DEPT-135 NMR Spectrum of Compound 6b

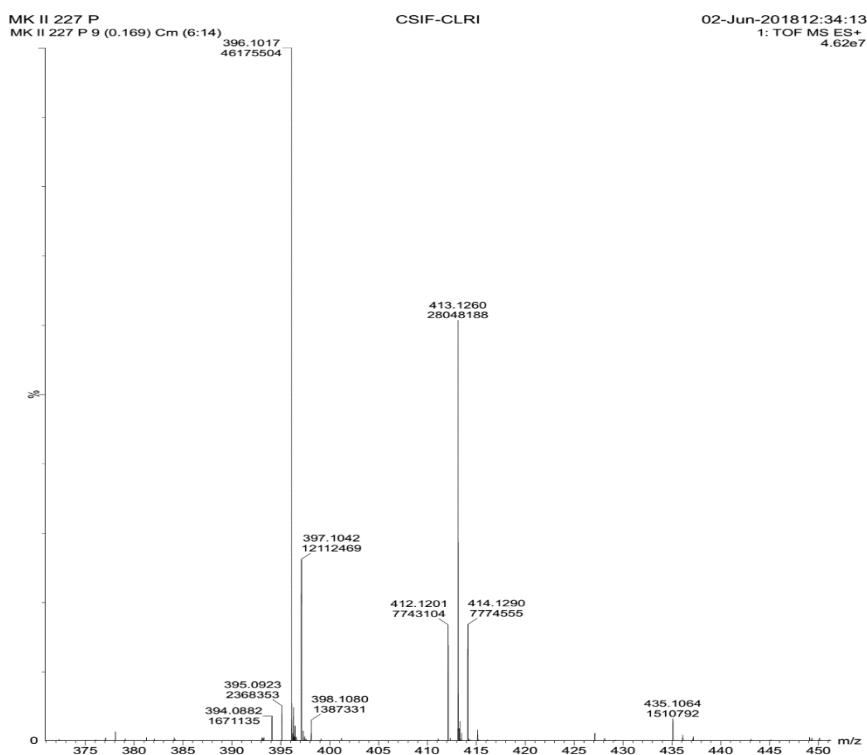

### HRMS Spectrum of Compound 6b

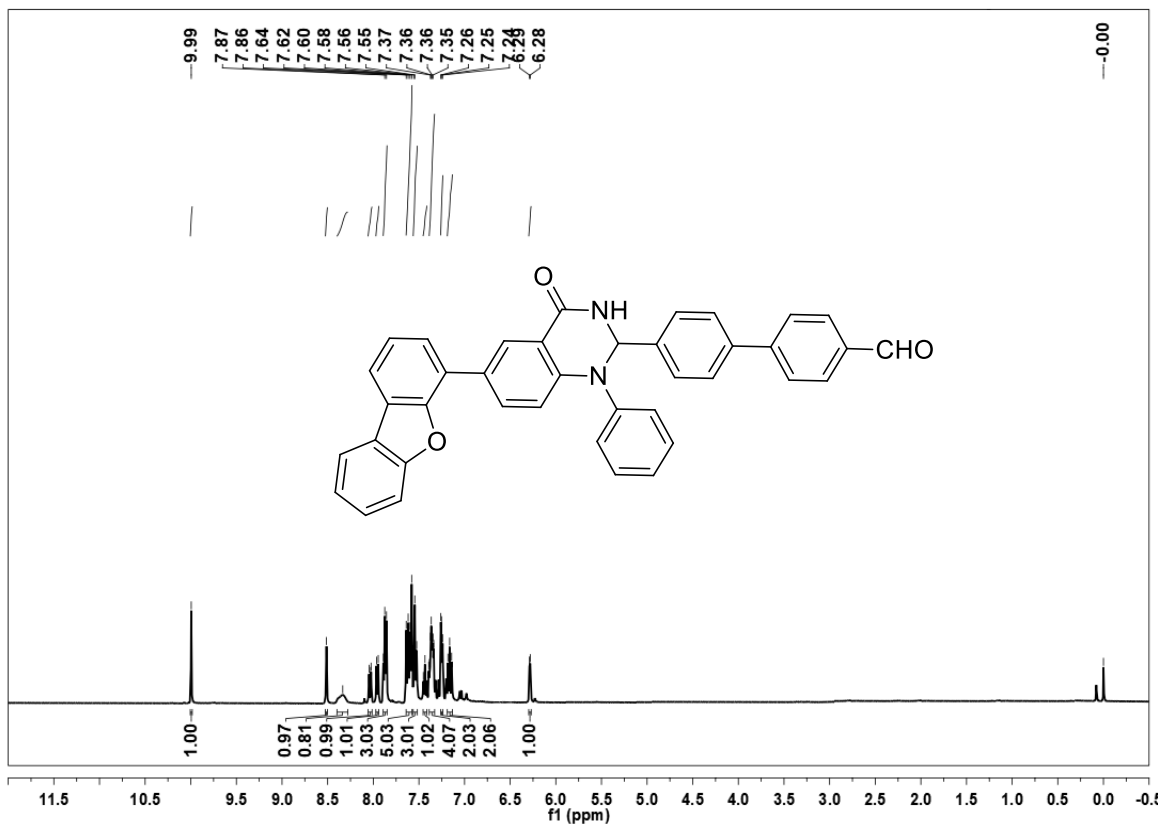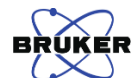

Current Data Parameters  
NAME MKII-221 P1  
EXPNO 1  
PROCNO 1

F2 - Acquisition Parameters  
Date\_ 20180503  
Time 16.32  
INSTRUM spect  
PROBHD 5 mm PABBO BB/  
PULPROG zg30  
TD 65536  
SOLVENT CDCl3  
NS 16  
DS 2  
SWH 8012.820 Hz  
FIDRES 0.122266 Hz  
AQ 4.0894465 sec  
RG 31.36  
DW 62.400 usec  
DE 6.50 usec  
TE 0 K  
D1 1.00000000 sec  
TDO 1

===== CHANNEL f1 =====  
SF01 400.2324716 MHz  
NUC1 1H  
P1 12.75 usec  
PLW1 12.00000000 W

F2 - Processing parameters  
SI 65536  
SF 400.2300128 MHz  
WDW EM  
SSB 0  
LB 0.30 Hz  
GB 0  
PC 1.00

<sup>1</sup>H NMR Spectrum of Compound 7a

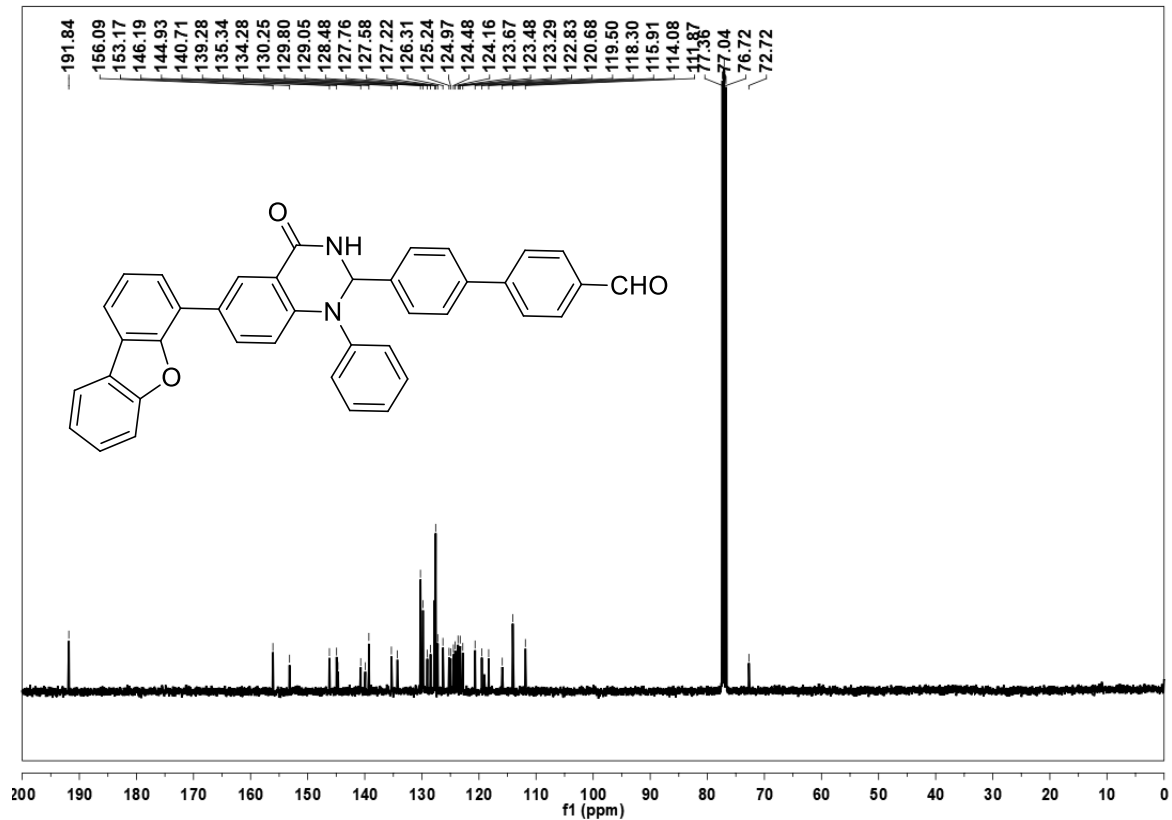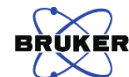

Current Data Parameters  
NAME MKII-221 P1  
EXPNO 2  
PROCNO 1

F2 - Acquisition Parameters  
Date\_ 20180503  
Time 17.01  
INSTRUM spect  
PROBHD 5 mm PABBO BB/  
PULPROG zgpg30  
TD 65536  
SOLVENT CDCl3  
NS 512  
DS 4  
SWH 24038.461 Hz  
FIDRES 0.366798 Hz  
AQ 1.3631488 sec  
RG 204.46  
DW 20.800 usec  
DE 6.50 usec  
TE 0 K  
D1 2.00000000 sec  
D11 0.03000000 sec  
TDO 1

===== CHANNEL f1 =====  
SF01 100.6479769 MHz  
NUC1 13C  
P1 10.62 usec  
PLW1 54.00000000 W

===== CHANNEL f2 =====  
SF02 400.2316009 MHz  
NUC2 1H  
PCPD2 waltz16  
PCPD2 90.00 usec  
PLW2 12.00000000 W  
PLW12 0.24983000 W  
PLW13 0.19508000 W

F2 - Processing parameters  
SI 32768  
SF 100.6379135 MHz  
WDW EM  
SSB 0  
LB 1.00 Hz  
GB 0  
PC 1.40

<sup>13</sup>C NMR Spectrum of Compound 7a

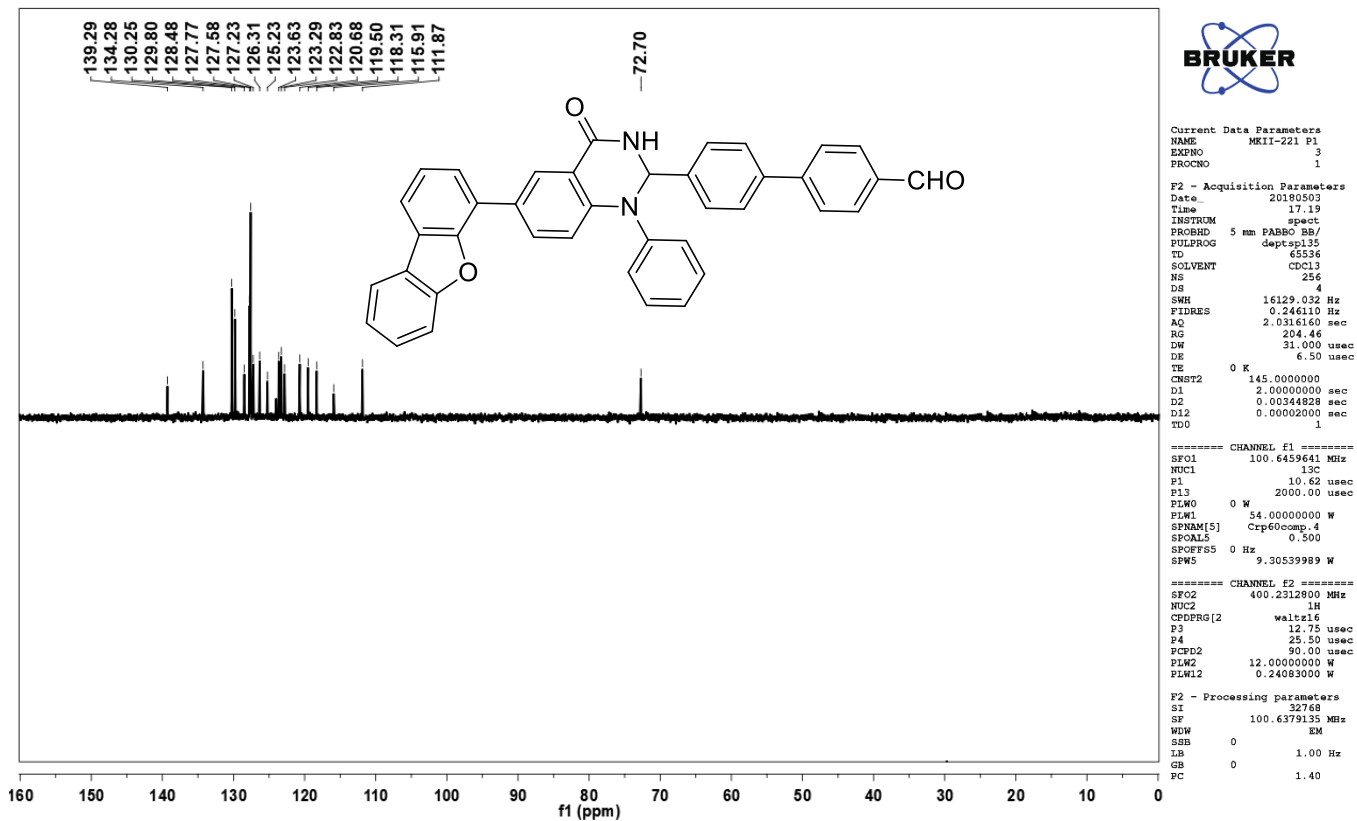

DEPT-135 NMR Spectrum of Compound **7a**

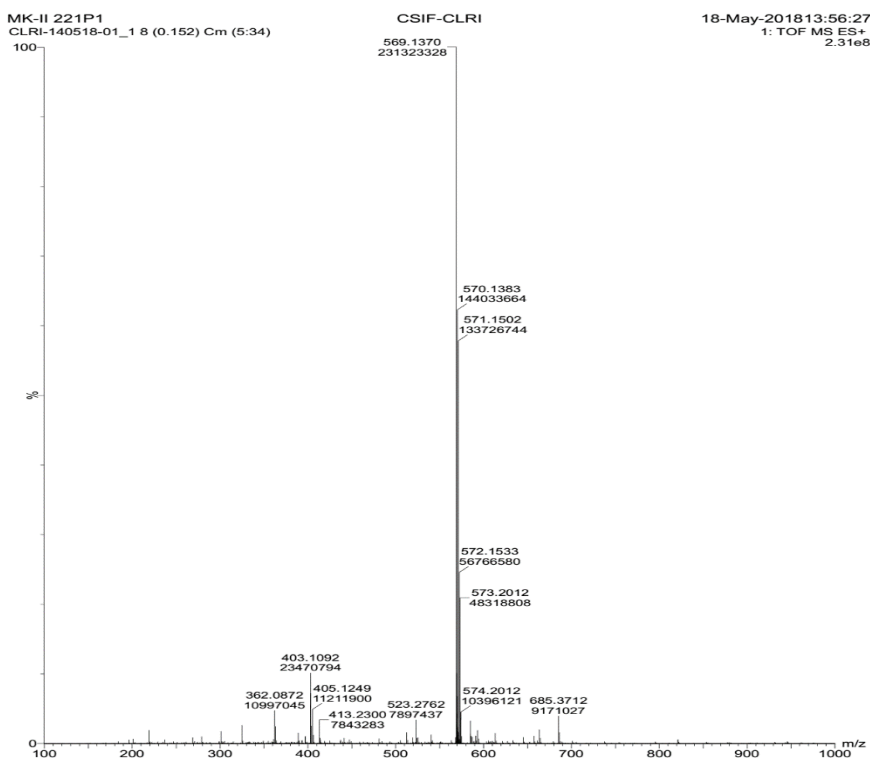

HRMS Spectrum of Compound **7a**

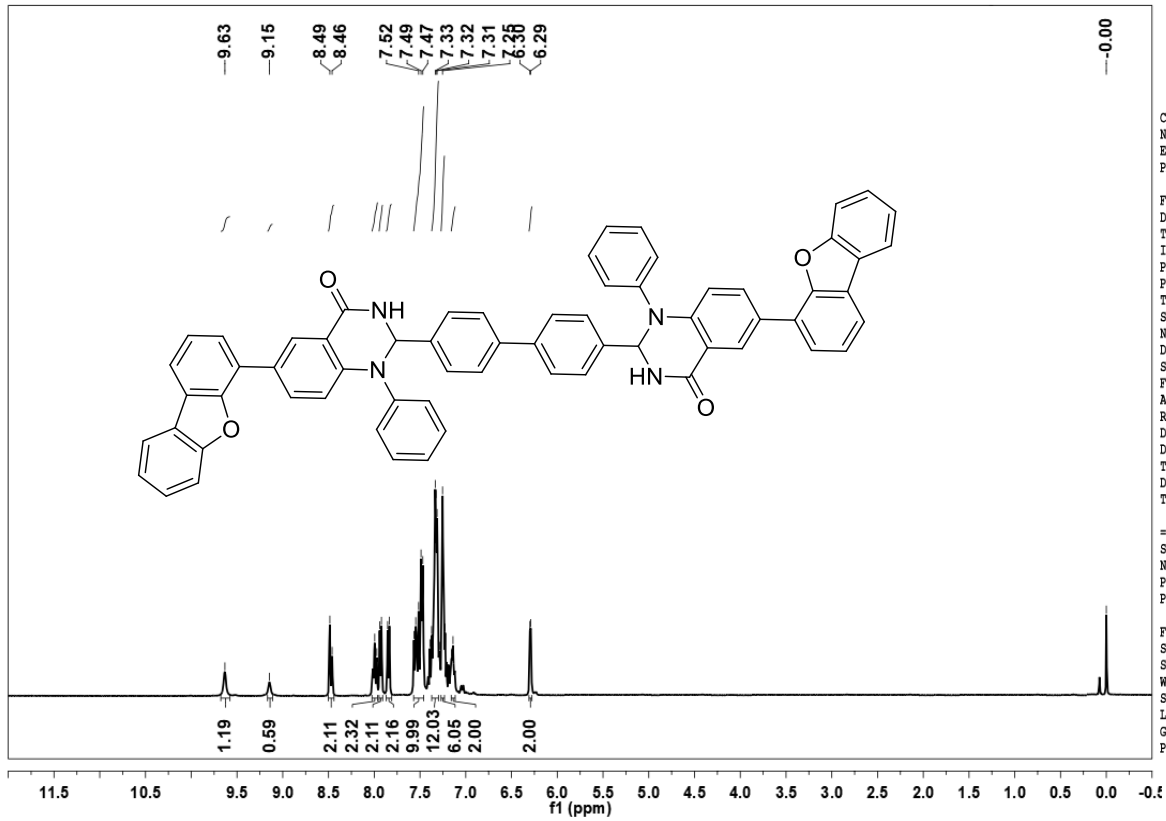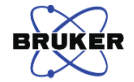

Current Data Parameters  
 NAME MKII-221 P2  
 EXPNO 1  
 PROCNO 1

F2 - Acquisition Parameters  
 Date\_ 20180503  
 Time 17.26  
 INSTRUM spect  
 PROBHD 5 mm PABBO BB/  
 PULPROG zg30  
 TD 65536  
 SOLVENT CDCl3  
 NS 32  
 DS 2  
 SWH 8012.820 Hz  
 FIDRES 0.122266 Hz  
 AQ 4.0894465 sec  
 RG 72.51  
 DW 62.400 usec  
 DE 6.50 usec  
 TE 0 K  
 D1 1.00000000 sec  
 TD0 1

==== CHANNEL f1 =====  
 SF01 400.2324716 MHz  
 NUC1 1H  
 P1 12.75 usec  
 PLW1 12.00000000 W

F2 - Processing parameters  
 SI 65536  
 SF 400.2300121 MHz  
 WDW EM  
 SSB 0  
 LB 0.30 Hz  
 GB 0  
 PC 1.00

**<sup>1</sup>H NMR Spectrum of Compound 7b**

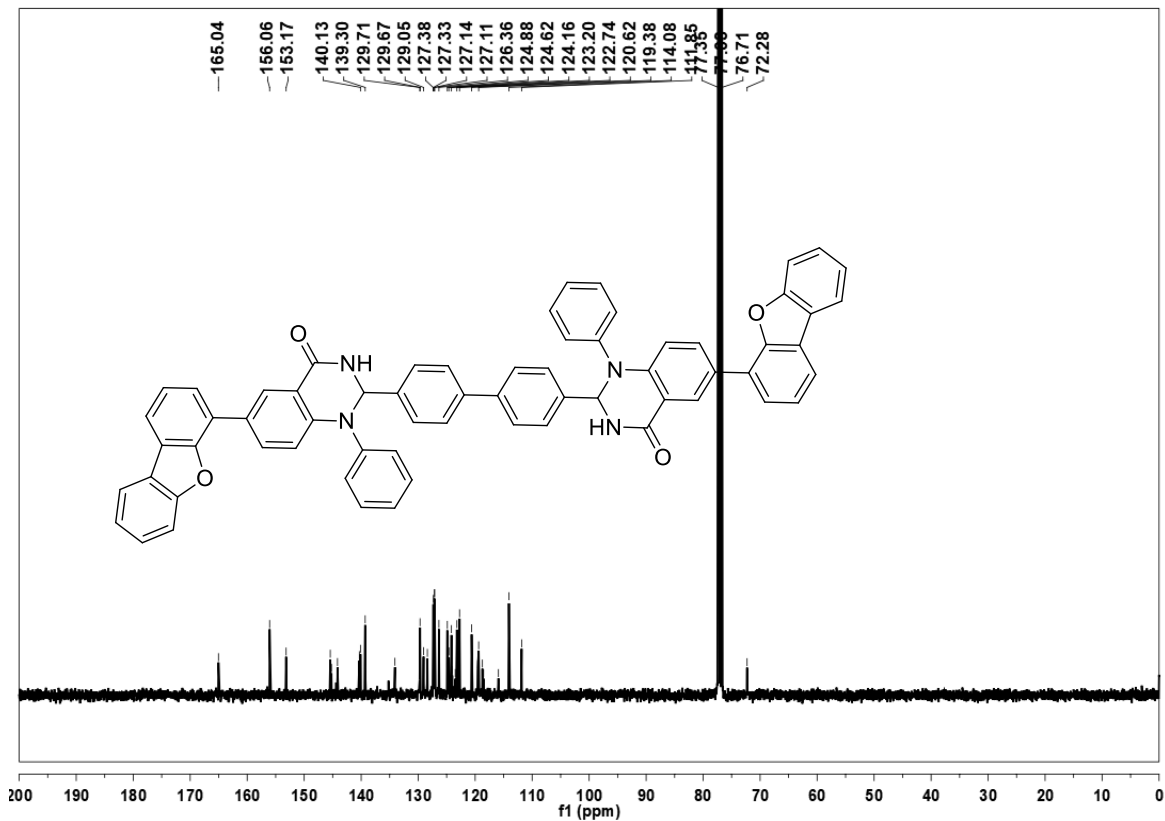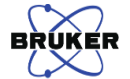

Current Data Parameters  
 NAME MKII-221 P2  
 EXPNO 2  
 PROCNO 1

F2 - Acquisition Parameters  
 Date\_ 20180503  
 Time 18.25  
 INSTRUM spect  
 PROBHD 5 mm PABBO BB/  
 PULPROG zgpg30  
 TD 65536  
 SOLVENT CDCl3  
 NS 1024  
 DS 4  
 SWH 24038.461 Hz  
 FIDRES 0.366798 Hz  
 AQ 1.3631488 sec  
 RG 204.46  
 DW 20.800 usec  
 DE 6.50 usec  
 TE 0 K  
 D1 2.00000000 sec  
 D11 0.03000000 sec  
 TD0 1

==== CHANNEL f1 =====  
 SF01 100.6479769 MHz  
 NUC1 13C  
 P1 10.62 usec  
 PLW1 54.00000000 W

==== CHANNEL f2 =====  
 SF02 400.2316009 MHz  
 NUC2 1H  
 CPDPRG2 waltz16  
 PCPD2 90.00 usec  
 PLW2 12.00000000 W  
 PLW12 0.24083000 W  
 PLW13 0.19508000 W

F2 - Processing parameters  
 SI 32768  
 SF 100.6379135 MHz  
 WDW EM  
 SSB 0  
 LB 1.00 Hz  
 GB 0  
 PC 1.40

**<sup>13</sup>C NMR Spectrum of Compound 7b**

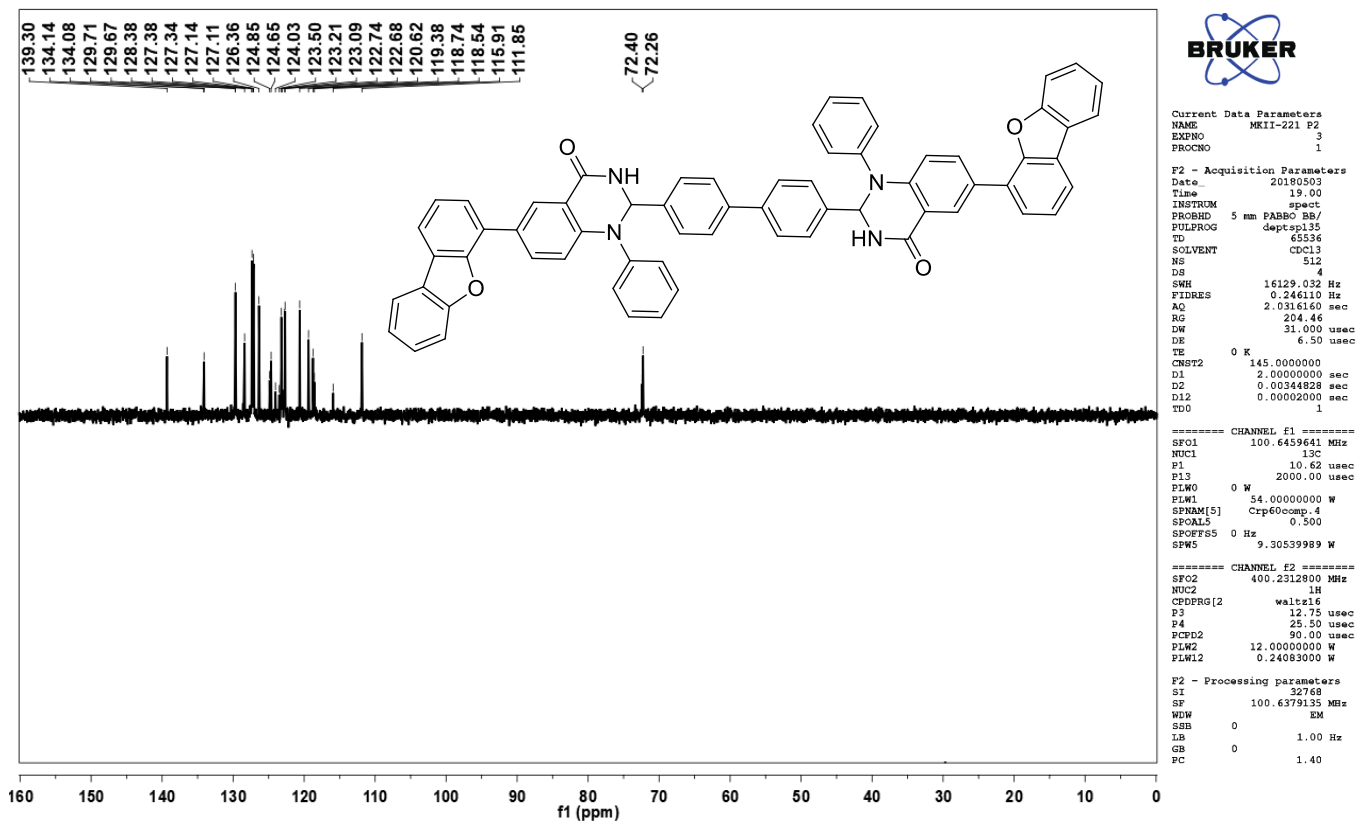

DEPT-135 NMR Spectrum of Compound 7b

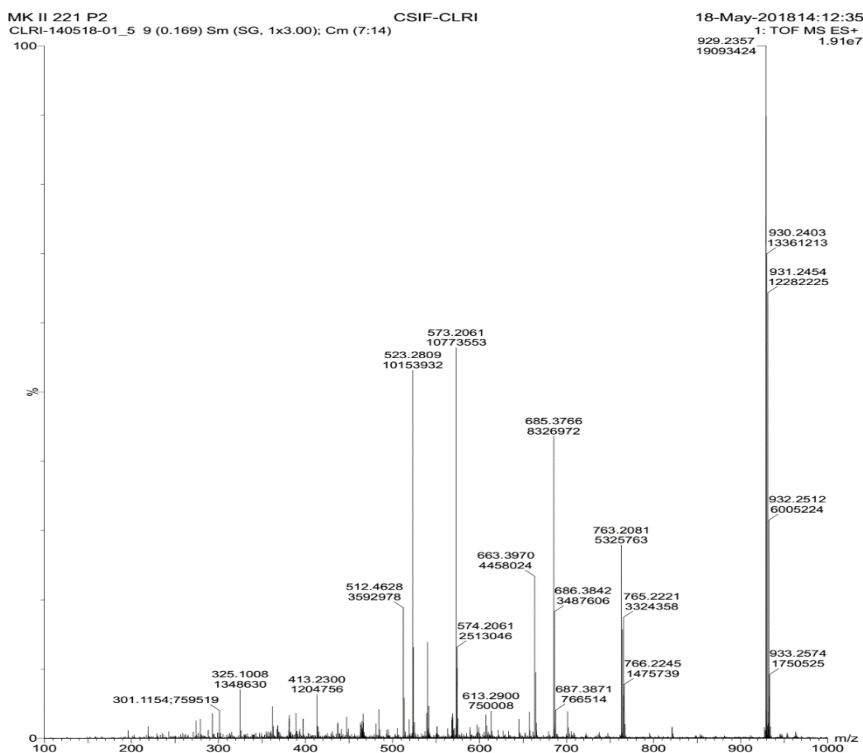

HRMS Spectrum of Compound 7b

## 1. Absorption and emission data of compounds

**Table 1.** Absorption, emission maxima and Stoke shift of the selected synthesized compounds

| Product | Absorption $\lambda_{\max}$ (nm) | Emission $\lambda_{\max}$ (nm) | $\Delta\bar{\nu}$ ( $\text{cm}^{-1}$ ) |
|---------|----------------------------------|--------------------------------|----------------------------------------|
| 3f      | 347                              | 585                            | 11724                                  |
| 4b      | 295                              | 502                            | 13977                                  |
| 4c      | 328                              | 492                            | 10162                                  |
| 4g      | 332                              | 485                            | 9501                                   |
| 4h      | 318                              | 474                            | 10349                                  |
| 4l      | 482                              | 584                            | 3622                                   |
| 5a      | 347                              | 333, 448                       | 4692                                   |
| 7a      | 289                              | 418                            | 10678                                  |
| 7b      | 319                              | 449                            | 9076                                   |

## 2. Copy of UV-Visible and Emission spectra

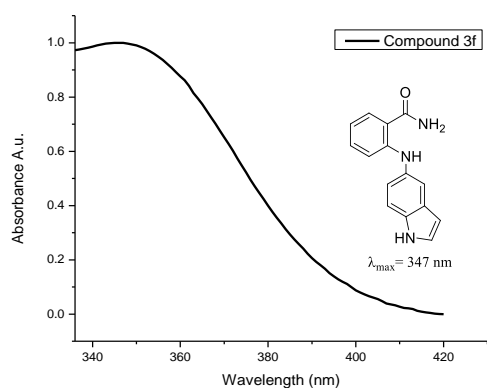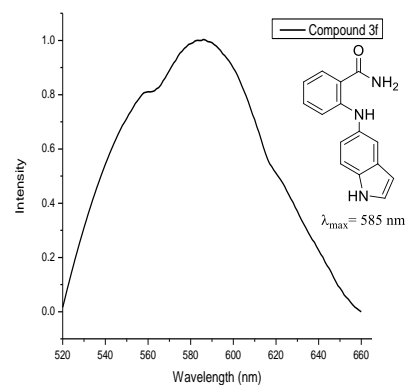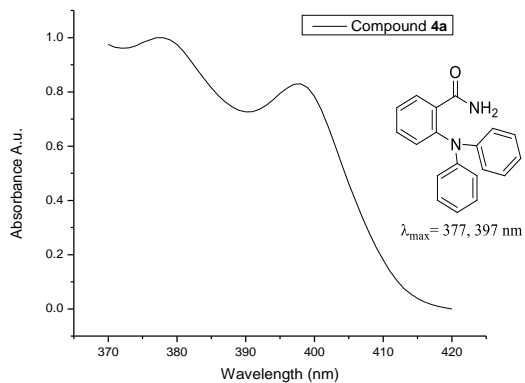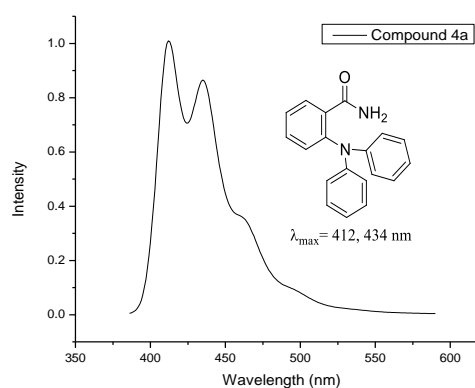

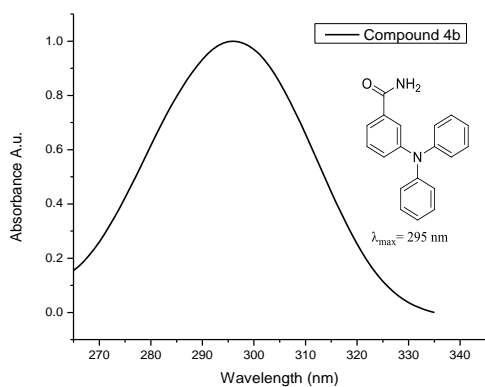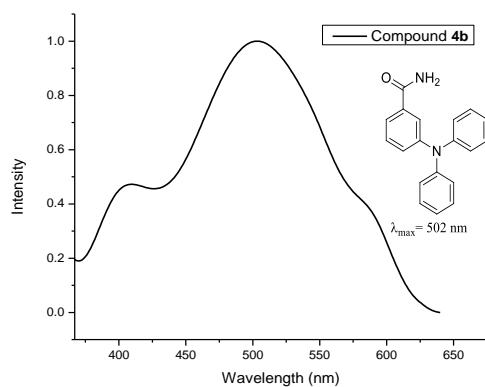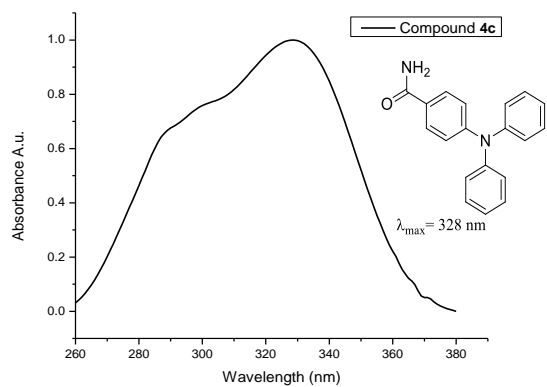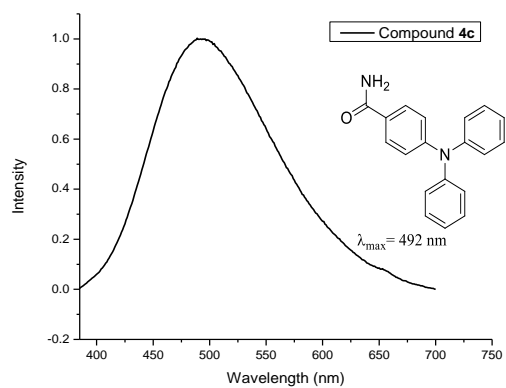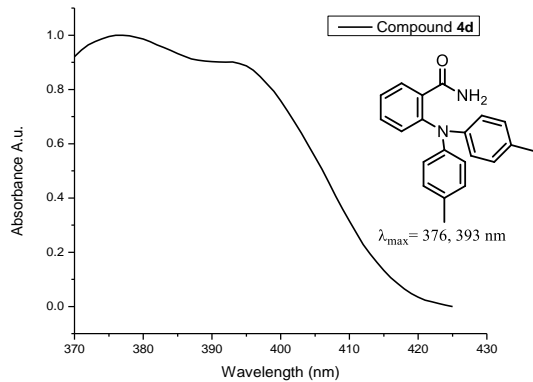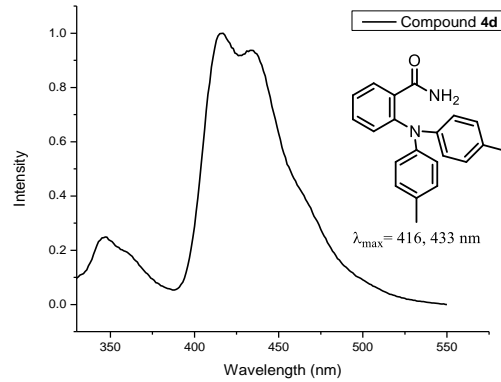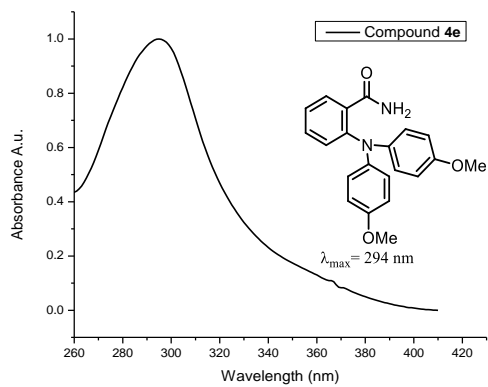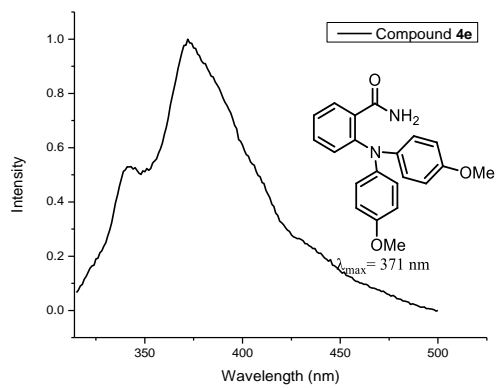

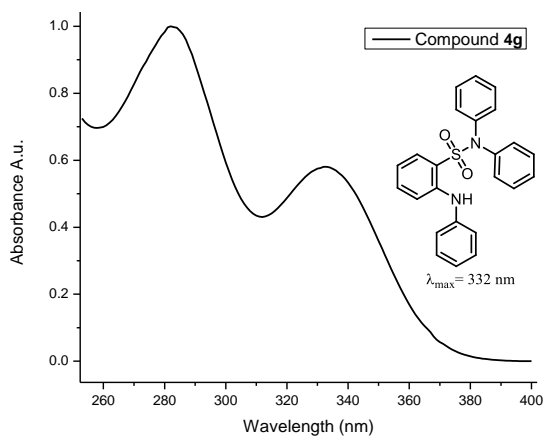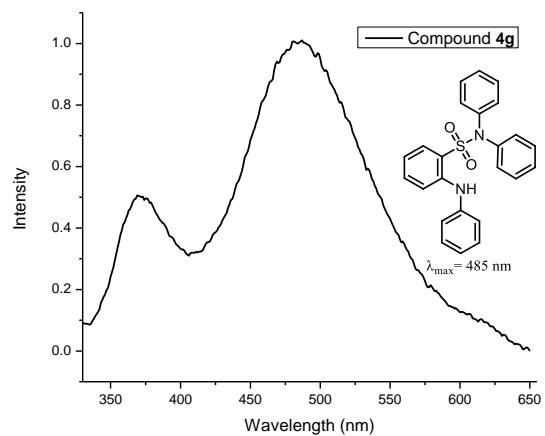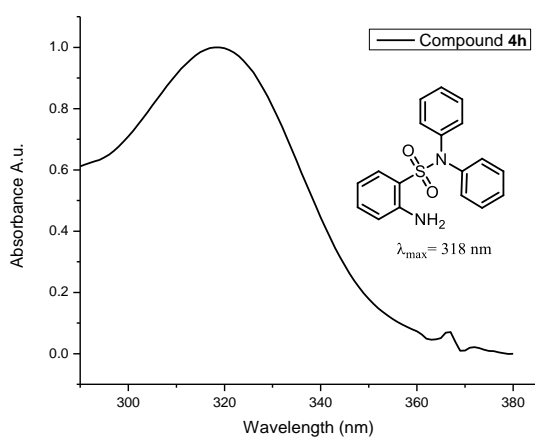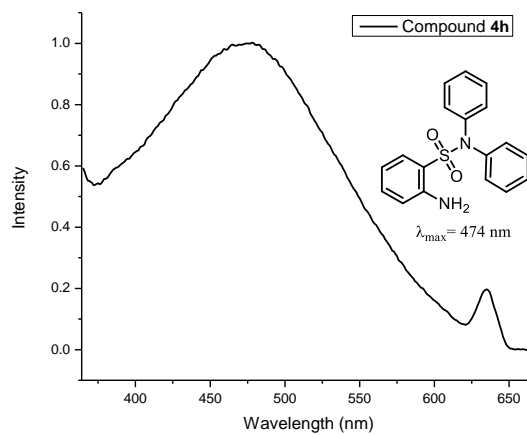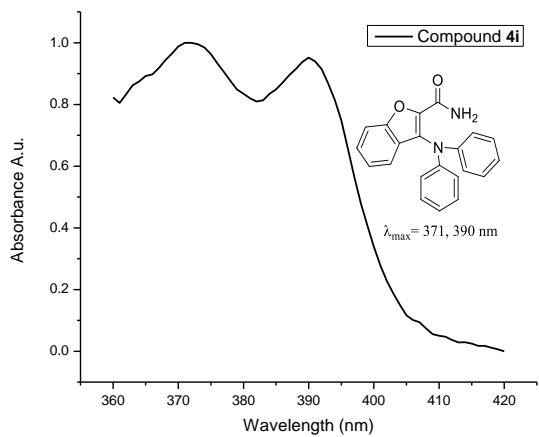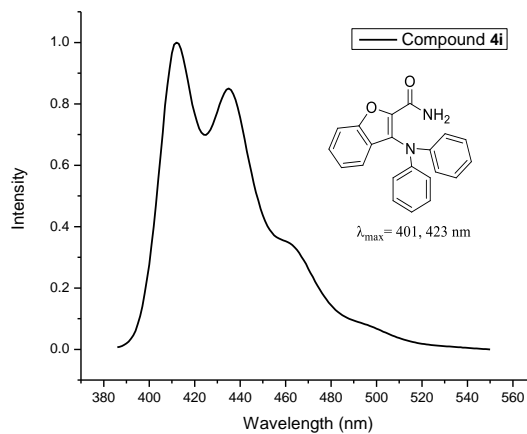



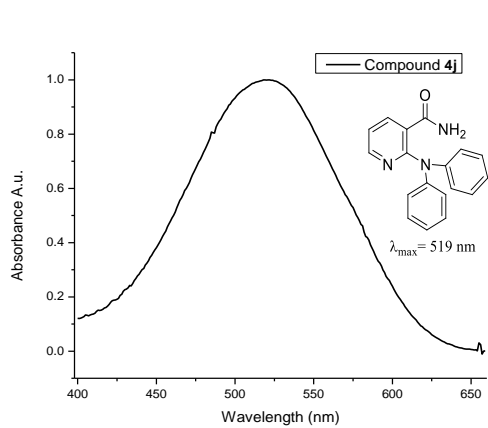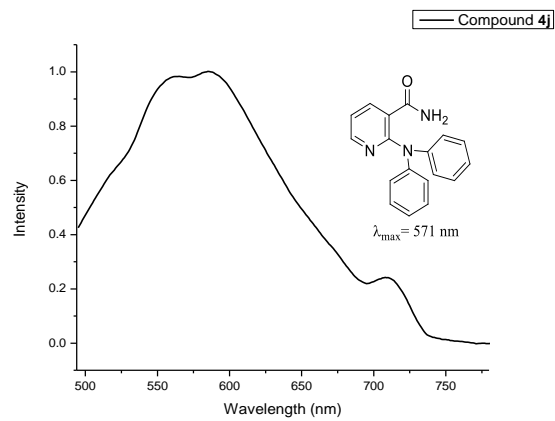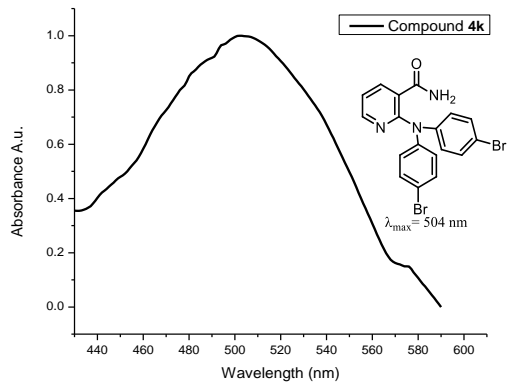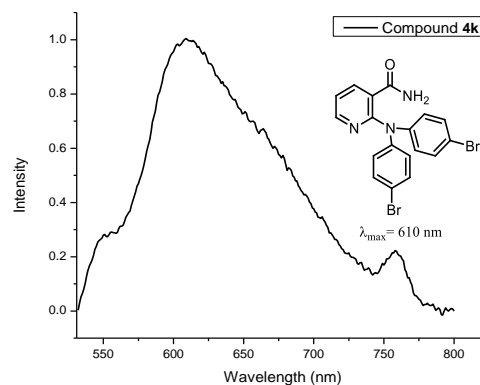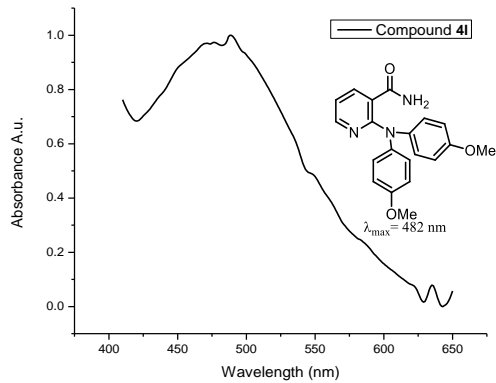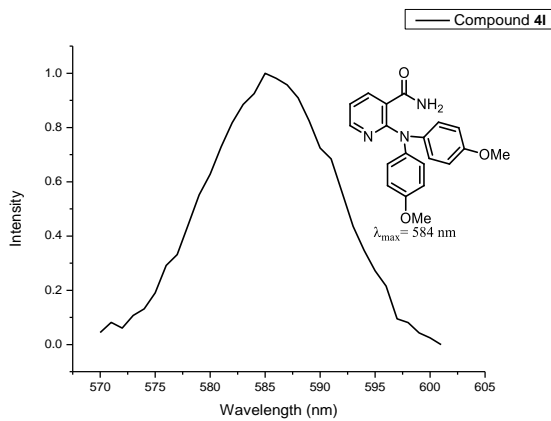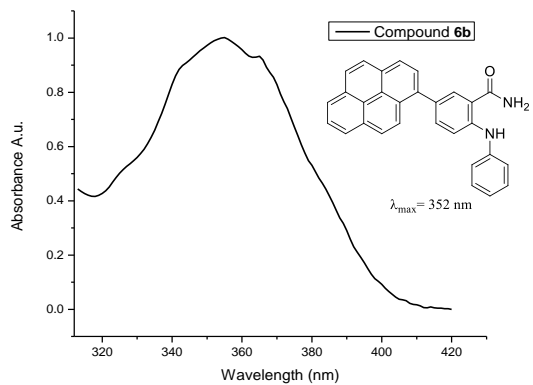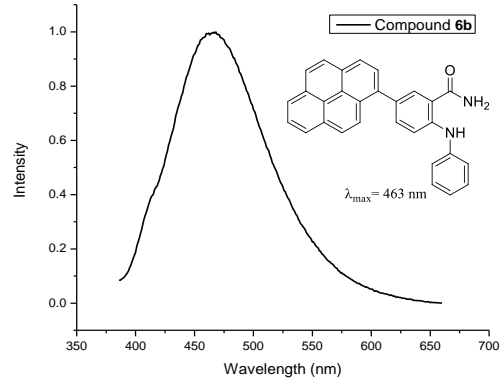

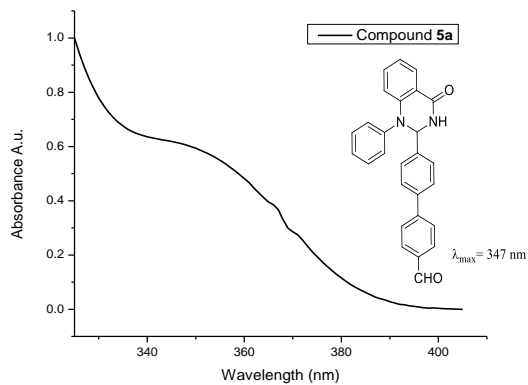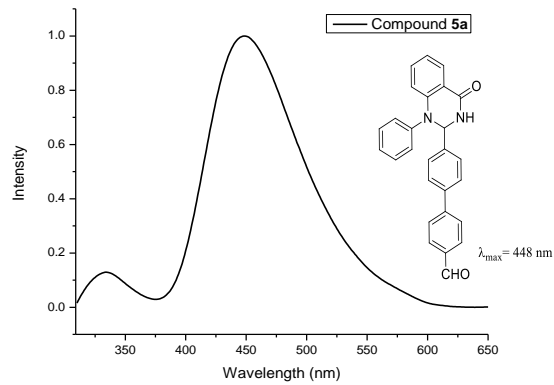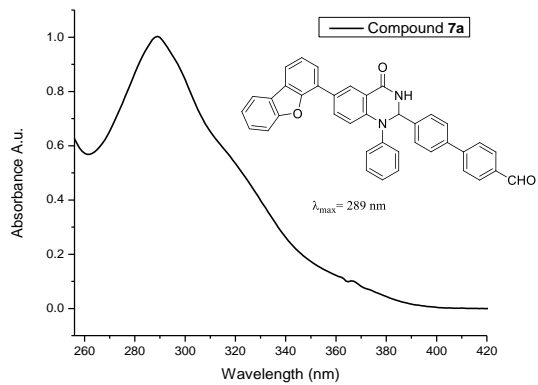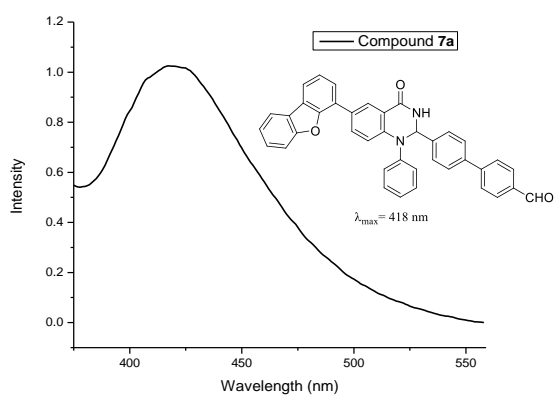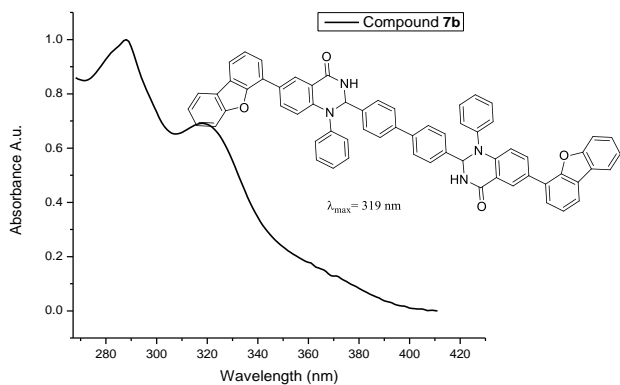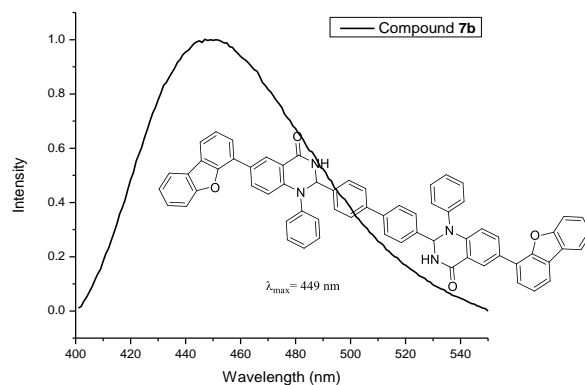

### 3. Crystallographic data of Compound 4a

Table 1. Crystal data and structure refinement for Compound 4a.

|                                   |                                                  |                 |
|-----------------------------------|--------------------------------------------------|-----------------|
| Identification code               | Compound 4a                                      |                 |
| Empirical formula                 | C <sub>19</sub> H <sub>16</sub> N <sub>2</sub> O |                 |
| Formula weight                    | 288.34                                           |                 |
| Temperature                       | 296(2) K                                         |                 |
| Wavelength                        | 0.71073 Å                                        |                 |
| Crystal system                    | Triclinic                                        |                 |
| Space group                       | P-1                                              |                 |
| Unit cell dimensions              | a = 9.1292(7) Å                                  | α = 84.328(3)°. |
|                                   | b = 9.3744(7) Å                                  | β = 88.471(3)°. |
|                                   | c = 10.0457(6) Å                                 | γ = 61.065(3)°. |
| Volume                            | 748.50(9) Å <sup>3</sup>                         |                 |
| Z                                 | 2                                                |                 |
| Density (calculated)              | 1.279 Mg/m <sup>3</sup>                          |                 |
| Absorption coefficient            | 0.080 mm <sup>-1</sup>                           |                 |
| F(000)                            | 304                                              |                 |
| Crystal size                      | 0.150 x 0.150 x 0.100 mm <sup>3</sup>            |                 |
| Theta range for data collection   | 2.495 to 25.999°.                                |                 |
| Index ranges                      | -11 ≤ h ≤ 11, -11 ≤ k ≤ 11, -12 ≤ l ≤ 12         |                 |
| Reflections collected             | 21188                                            |                 |
| Independent reflections           | 2919 [R(int) = 0.0351]                           |                 |
| Completeness to theta = 25.242°   | 99.2 %                                           |                 |
| Absorption correction             | Multi-scan                                       |                 |
| Max. and min. transmission        | 0.7462 and 0.7122                                |                 |
| Refinement method                 | Full-matrix least-squares on F <sup>2</sup>      |                 |
| Data / restraints / parameters    | 2919 / 0 / 208                                   |                 |
| Goodness-of-fit on F <sup>2</sup> | 1.044                                            |                 |
| Final R indices [I > 2σ(I)]       | R1 = 0.0394, wR2 = 0.0925                        |                 |
| R indices (all data)              | R1 = 0.0624, wR2 = 0.1126                        |                 |
| Extinction coefficient            | 0.034(4)                                         |                 |
| Largest diff. peak and hole       | 0.230 and -0.184 e.Å <sup>-3</sup>               |                 |

#### 4. Solvatochromic effect of compound 4j

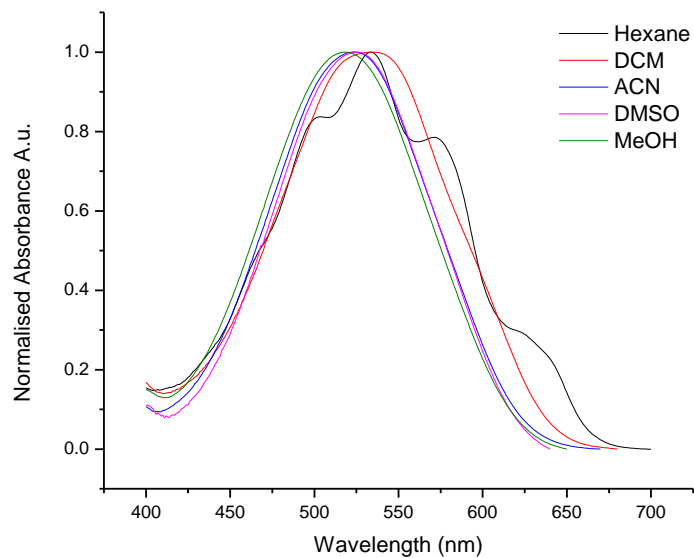

Solvatochromism of Compound 4j (Absorption)

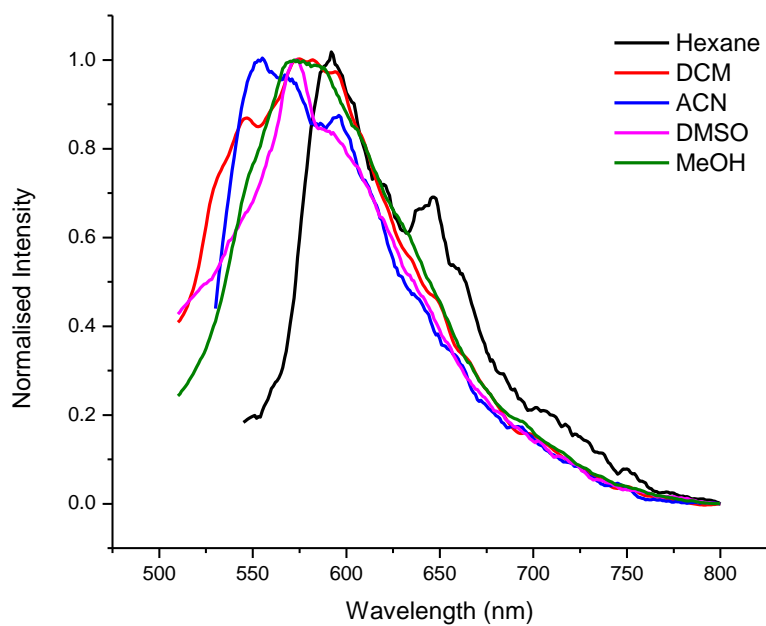

Solvatochromism of Compound 4j (Emission)
